# Supplementary material for: Construction of a HOXA11-AS-Interacted Network in Keloid Fibroblasts Using Integrated Bioinformatic Analysis and in Vitro Validation
Source: Front Genet. 2022 Mar 31;13:844198. doi: 10.3389/fgene.2022.844198 (PMC9010035; doi:10.3389/fgene.2022.844198)
Supplement: Supplementary file 5 [file DataSheet3.CSV]

SUID	EdgeBetweenness	interaction	name	selected	shared interaction	shared name
229362	355.6555233	interacts with	PSMD4 (interacts with) UBADC1	FALSE	interacts with	PSMD4 (interacts with) UBADC1
229361	161.398487	interacts with	PSMD4 (interacts with) PSMD5	FALSE	interacts with	PSMD4 (interacts with) PSMD5
278517	583.6120771	interacts with	MYC (interacts with) TUBA8	FALSE	interacts with	MYC (interacts with) TUBA8
229360	84.15499612	interacts with	PSMD4 (interacts with) SOD1	FALSE	interacts with	PSMD4 (interacts with) SOD1
229359	50.3213588	interacts with	PSMD4 (interacts with) USP14	FALSE	interacts with	PSMD4 (interacts with) USP14
262134	293.4619461	interacts with	MAPK3 (interacts with) TP53	FALSE	interacts with	MAPK3 (interacts with) TP53
229365	38.45374004	interacts with	PSMD4 (interacts with) p44S10	FALSE	interacts with	PSMD4 (interacts with) p44S10
229364	774.0151582	interacts with	PSMD4 (interacts with) UBC	FALSE	interacts with	PSMD4 (interacts with) UBC
229363	43.47236851	interacts with	PSMD4 (interacts with) PSMD8	FALSE	interacts with	PSMD4 (interacts with) PSMD8
262140	74.07727097	interacts with	MAPK3 (interacts with) PRKCD	FALSE	interacts with	MAPK3 (interacts with) PRKCD
229368	67.55805185	interacts with	PSMD4 (interacts with) UCHL5	FALSE	interacts with	PSMD4 (interacts with) UCHL5
262142	141.95623	interacts with	MAPK3 (interacts with) SQSTM1	FALSE	interacts with	MAPK3 (interacts with) SQSTM1
262135	94.3506844	interacts with	MAPK3 (interacts with) SP1	FALSE	interacts with	MAPK3 (interacts with) SP1
278520	160.1911066	interacts with	MYC (interacts with) SP1	FALSE	interacts with	MYC (interacts with) SP1
278522	205.7035441	interacts with	MYC (interacts with) UBB	FALSE	interacts with	MYC (interacts with) UBB
262138	72.62521186	interacts with	MAPK3 (interacts with) PPP2CA	FALSE	interacts with	MAPK3 (interacts with) PPP2CA
262143	53.36585009	interacts with	MAPK3 (interacts with) VDR	FALSE	interacts with	MAPK3 (interacts with) VDR
229382	181.1559659	interacts with	FNBP3 (interacts with) SF3A2	FALSE	interacts with	FNBP3 (interacts with) SF3A2
262144	714.336572	interacts with	MAPK3 (interacts with) PPP1CA	FALSE	interacts with	MAPK3 (interacts with) PPP1CA
262145	159.6924233	interacts with	MAPK3 (interacts with) SRC	FALSE	interacts with	MAPK3 (interacts with) SRC
229379	457.7551497	interacts with	FNBP3 (interacts with) HNRPU	FALSE	interacts with	FNBP3 (interacts with) HNRPU
278539	319.4386038	interacts with	MYC (interacts with) PFDN5	FALSE	interacts with	MYC (interacts with) PFDN5
229386	164.5140342	interacts with	FNBP3 (interacts with) PIAS4	FALSE	interacts with	FNBP3 (interacts with) PIAS4
262156	158.2849673	interacts with	MAPK3 (interacts with) MYC	FALSE	interacts with	MAPK3 (interacts with) MYC
278540	306.1936629	interacts with	MYC (interacts with) PIAS2	FALSE	interacts with	MYC (interacts with) PIAS2
262157	123.2948912	interacts with	MAPK3 (interacts with) TAL1	FALSE	interacts with	MAPK3 (interacts with) TAL1
262151	153.454167	interacts with	MAPK3 (interacts with) SMAD2	FALSE	interacts with	MAPK3 (interacts with) SMAD2
262153	119.7829325	interacts with	MAPK3 (interacts with) TCF3	FALSE	interacts with	MAPK3 (interacts with) TCF3
262163	96.46418898	interacts with	MAPK3 (interacts with) RAF1	FALSE	interacts with	MAPK3 (interacts with) RAF1
229391	148.0669711	interacts with	FNBP3 (interacts with) ZHX1	FALSE	interacts with	FNBP3 (interacts with) ZHX1
262160	140.3891306	interacts with	MAPK3 (interacts with) RET	FALSE	interacts with	MAPK3 (interacts with) RET
262175	190.0498293	interacts with	MAPK3 (interacts with) PEA15	FALSE	interacts with	MAPK3 (interacts with) PEA15
229412	380.1443069	interacts with	FNBP3 (interacts with) RPLP0	FALSE	interacts with	FNBP3 (interacts with) RPLP0
229423	250.0669071	interacts with	FNBP3 (interacts with) HD	FALSE	interacts with	FNBP3 (interacts with) HD
262203	103.3712182	interacts with	MAPK3 (interacts with) STAT3	FALSE	interacts with	MAPK3 (interacts with) STAT3
229438	187.0932705	interacts with	FNBP3 (interacts with) YLPM1	FALSE	interacts with	FNBP3 (interacts with) YLPM1
229497	192.5390029	interacts with	MST1R (interacts with) YWHAZ	FALSE	interacts with	MST1R (interacts with) YWHAZ
229501	111.9391163	interacts with	MST1R (interacts with) RELA	FALSE	interacts with	MST1R (interacts with) RELA
229499	658.5393737	interacts with	MST1R (interacts with) UBC	FALSE	interacts with	MST1R (interacts with) UBC
229507	139.2223663	interacts with	MST1R (interacts with) STUB1	FALSE	interacts with	MST1R (interacts with) STUB1
229512	157.8412178	interacts with	MST1R (interacts with) SRC	FALSE	interacts with	MST1R (interacts with) SRC
245910	1035.061324	interacts with	PSMD8 (interacts with) UBC	FALSE	interacts with	PSMD8 (interacts with) UBC
278683	2	interacts with	C20orf3 (interacts with) LOXL3	FALSE	interacts with	C20orf3 (interacts with) LOXL3
245914	21.36001737	interacts with	PSMD8 (interacts with) p44S10	FALSE	interacts with	PSMD8 (interacts with) p44S10
245912	274.7953975	interacts with	PSMD8 (interacts with) SMAD2	FALSE	interacts with	PSMD8 (interacts with) SMAD2
245911	348.181319	interacts with	PSMD8 (interacts with) TRAF6	FALSE	interacts with	PSMD8 (interacts with) TRAF6
245916	33.82091377	interacts with	PSMD8 (interacts with) UCHL5	FALSE	interacts with	PSMD8 (interacts with) UCHL5
245915	25.53413076	interacts with	PSMD8 (interacts with) USP14	FALSE	interacts with	PSMD8 (interacts with) USP14
229556	154.6106253	interacts with	PARK7 (interacts with) UBE2I	FALSE	interacts with	PARK7 (interacts with) UBE2I
229560	296.1522776	interacts with	PARK7 (interacts with) STUB1	FALSE	interacts with	PARK7 (interacts with) STUB1
229566	190.5290763	interacts with	PARK7 (interacts with) SUMO1	FALSE	interacts with	PARK7 (interacts with) SUMO1
229565	77.44487909	interacts with	PARK7 (interacts with) SOD1	FALSE	interacts with	PARK7 (interacts with) SOD1
229563	85.14096472	interacts with	PARK7 (interacts with) UBA2	FALSE	interacts with	PARK7 (interacts with) UBA2
229568	58.4409386	interacts with	PARK7 (interacts with) PIAS2	FALSE	interacts with	PARK7 (interacts with) PIAS2
229582	489.9709992	interacts with	ITSN2 (interacts with) PTN	FALSE	interacts with	ITSN2 (interacts with) PTN
229583	421.0013287	interacts with	ITSN2 (interacts with) RAD9A	FALSE	interacts with	ITSN2 (interacts with) RAD9A
229588	472.9031275	interacts with	ITSN2 (interacts with) MAP4K3	FALSE	interacts with	ITSN2 (interacts with) MAP4K3
278748	349.6973472	interacts with	AMPH (interacts with) CDK5R1	FALSE	interacts with	AMPH (interacts with) CDK5R1
245982	1844	interacts with	FLJ14668 (interacts with) LSM1	FALSE	interacts with	FLJ14668 (interacts with) LSM1
278746	607.1874348	interacts with	AMPH (interacts with) CDK1	FALSE	interacts with	AMPH (interacts with) CDK1
229602	161.5902237	interacts with	CALM3 (interacts with) ESR1	FALSE	interacts with	CALM3 (interacts with) ESR1
229601	144.618164	interacts with	CALM3 (interacts with) YWHAZ	FALSE	interacts with	CALM3 (interacts with) YWHAZ
278751	327.0972955	interacts with	AMPH (interacts with) VTN	FALSE	interacts with	AMPH (interacts with) VTN
229605	729.8182822	interacts with	CALM3 (interacts with) IKBKG	FALSE	interacts with	CALM3 (interacts with) IKBKG
229604	142.3156846	interacts with	CALM3 (interacts with) SMAD2	FALSE	interacts with	CALM3 (interacts with) SMAD2
229603	193.1005291	interacts with	CALM3 (interacts with) TRAF6	FALSE	interacts with	CALM3 (interacts with) TRAF6
229610	69.00496447	interacts with	CALM3 (interacts with) NFKB1	FALSE	interacts with	CALM3 (interacts with) NFKB1
229609	85.85253921	interacts with	CALM3 (interacts with) NFKBIA	FALSE	interacts with	CALM3 (interacts with) NFKBIA
229608	134.1148524	interacts with	CALM3 (interacts with) NR3C1	FALSE	interacts with	CALM3 (interacts with) NR3C1
229607	91.72250361	interacts with	CALM3 (interacts with) TRAF2	FALSE	interacts with	CALM3 (interacts with) TRAF2
278759	940.3011376	interacts with	AMPH (interacts with) CLTC	FALSE	interacts with	AMPH (interacts with) CLTC
229614	63.19152107	interacts with	CALM3 (interacts with) TNFRSF1A	FALSE	interacts with	CALM3 (interacts with) TNFRSF1A
229613	124.5370855	interacts with	CALM3 (interacts with) MAP3K3	FALSE	interacts with	CALM3 (interacts with) MAP3K3
229612	93.762173	interacts with	CALM3 (interacts with) IKBKB	FALSE	interacts with	CALM3 (interacts with) IKBKB
229611	63.1292205	interacts with	CALM3 (interacts with) CHUK	FALSE	interacts with	CALM3 (interacts with) CHUK
229616	57.21779304	interacts with	CALM3 (interacts with) MAP3K14	FALSE	interacts with	CALM3 (interacts with) MAP3K14
229615	85.04017019	interacts with	CALM3 (interacts with) PPP2R2B	FALSE	interacts with	CALM3 (interacts with) PPP2R2B
229622	199.8943518	interacts with	CALM3 (interacts with) EGFR	FALSE	interacts with	CALM3 (interacts with) EGFR
229620	58.84325093	interacts with	CALM3 (interacts with) TNFRSF1B	FALSE	interacts with	CALM3 (interacts with) TNFRSF1B
229619	47.26386147	interacts with	CALM3 (interacts with) NFKB2	FALSE	interacts with	CALM3 (interacts with) NFKB2
229628	35.43772234	interacts with	CALM3 (interacts with) TBK1	FALSE	interacts with	CALM3 (interacts with) TBK1
229632	49.22741831	interacts with	CALM3 (interacts with) NFKBIB	FALSE	interacts with	CALM3 (interacts with) NFKBIB
229631	201.1848564	interacts with	CALM3 (interacts with) TCF3	FALSE	interacts with	CALM3 (interacts with) TCF3
229638	46.23042157	interacts with	CALM3 (interacts with) RIPK2	FALSE	interacts with	CALM3 (interacts with) RIPK2
229637	122.8628459	interacts with	CALM3 (interacts with) EEF1D	FALSE	interacts with	CALM3 (interacts with) EEF1D
229635	41.33639409	interacts with	CALM3 (interacts with) TNF	FALSE	interacts with	CALM3 (interacts with) TNF
278795	319.9991085	interacts with	NQO1 (interacts with) STUB1	FALSE	interacts with	NQO1 (interacts with) STUB1
229641	36.45472847	interacts with	CALM3 (interacts with) NFKBIE	FALSE	interacts with	CALM3 (interacts with) NFKBIE
229646	245.6101246	interacts with	CALM3 (interacts with) RALA	FALSE	interacts with	CALM3 (interacts with) RALA
278794	790.340405	interacts with	NQO1 (interacts with) TP53	FALSE	interacts with	NQO1 (interacts with) TP53
229643	33.73188203	interacts with	CALM3 (interacts with) TANK	FALSE	interacts with	CALM3 (interacts with) TANK
229650	233.8795559	interacts with	CALM3 (interacts with) USP20	FALSE	interacts with	CALM3 (interacts with) USP20
229648	131.6828891	interacts with	CALM3 (interacts with) IKBKE	FALSE	interacts with	CALM3 (interacts with) IKBKE
229647	135.431703	interacts with	CALM3 (interacts with) NOS3	FALSE	interacts with	CALM3 (interacts with) NOS3
229657	44.10081546	interacts with	CALM3 (interacts with) MYO6	FALSE	interacts with	CALM3 (interacts with) MYO6
229656	92.16284804	interacts with	CALM3 (interacts with) RCHY1	FALSE	interacts with	CALM3 (interacts with) RCHY1
278822	855.3188241	interacts with	FADD (interacts with) UBC	FALSE	interacts with	FADD (interacts with) UBC
278827	79.85728937	interacts with	FADD (interacts with) TNFRSF1A	FALSE	interacts with	FADD (interacts with) TNFRSF1A
278828	112.3933167	interacts with	FADD (interacts with) PLK1	FALSE	interacts with	FADD (interacts with) PLK1
278830	61.03780642	interacts with	FADD (interacts with) XPO1	FALSE	interacts with	FADD (interacts with) XPO1
278823	722.5717324	interacts with	FADD (interacts with) IKBKG	FALSE	interacts with	FADD (interacts with) IKBKG
278824	134.3239602	interacts with	FADD (interacts with) TRAF2	FALSE	interacts with	FADD (interacts with) TRAF2
278825	155.1086525	interacts with	FADD (interacts with) SUMO1	FALSE	interacts with	FADD (interacts with) SUMO1
278837	56.40145673	interacts with	FADD (interacts with) RALBP1	FALSE	interacts with	FADD (interacts with) RALBP1
278831	64.57330146	interacts with	FADD (interacts with) IRAK1	FALSE	interacts with	FADD (interacts with) IRAK1
278844	44.08538908	interacts with	FADD (interacts with) XPO5	FALSE	interacts with	FADD (interacts with) XPO5
278853	105.4129381	interacts with	FADD (interacts with) FASLG	FALSE	interacts with	FADD (interacts with) FASLG
278847	288.1334238	interacts with	FADD (interacts with) NOL3	FALSE	interacts with	FADD (interacts with) NOL3
278855	212.9238528	interacts with	FADD (interacts with) PEA15	FALSE	interacts with	FADD (interacts with) PEA15
278856	122.4020312	interacts with	FADD (interacts with) LRDD	FALSE	interacts with	FADD (interacts with) LRDD
278857	49.36384539	interacts with	FADD (interacts with) RIPK1	FALSE	interacts with	FADD (interacts with) RIPK1
229738	1457.633042	interacts with	ARL5A (interacts with) KPNA2	FALSE	interacts with	ARL5A (interacts with) KPNA2
278892	70.90199783	interacts with	CAMK2D (interacts with) CYLD	FALSE	interacts with	CAMK2D (interacts with) CYLD
229740	421.3731163	interacts with	ARL5A (interacts with) NMT1	FALSE	interacts with	ARL5A (interacts with) NMT1
278889	1079.672324	interacts with	CAMK2D (interacts with) IKBKG	FALSE	interacts with	CAMK2D (interacts with) IKBKG
278890	366.7171788	interacts with	CAMK2D (interacts with) SMAD4	FALSE	interacts with	CAMK2D (interacts with) SMAD4
278895	409.8683175	interacts with	CAMK2D (interacts with) VIM	FALSE	interacts with	CAMK2D (interacts with) VIM
278897	114.4213609	interacts with	CAMK2D (interacts with) RPS18	FALSE	interacts with	CAMK2D (interacts with) RPS18
213408	1844	interacts with	KIAA1571 (interacts with) PPP1CA	FALSE	interacts with	KIAA1571 (interacts with) PPP1CA
229796	1844	interacts with	KANK1 (interacts with) PPP1CA	FALSE	interacts with	KANK1 (interacts with) PPP1CA
246180	263.9945616	interacts with	POLR2C (interacts with) RIF1	FALSE	interacts with	POLR2C (interacts with) RIF1
246179	1577.443626	interacts with	POLR2C (interacts with) UBC	FALSE	interacts with	POLR2C (interacts with) UBC
246185	241.6446685	interacts with	POLR2C (interacts with) TCEA1	FALSE	interacts with	POLR2C (interacts with) TCEA1
246184	136.3248478	interacts with	POLR2C (interacts with) SUPT5H	FALSE	interacts with	POLR2C (interacts with) SUPT5H
246196	100.230508	interacts with	POLR2C (interacts with) SUPT6H	FALSE	interacts with	POLR2C (interacts with) SUPT6H
246199	106.371912	interacts with	POLR2C (interacts with) POLR2D	FALSE	interacts with	POLR2C (interacts with) POLR2D
246203	114.552333	interacts with	POLR2C (interacts with) POLR2E	FALSE	interacts with	POLR2C (interacts with) POLR2E
278980	565.2535457	interacts with	KIAA1598 (interacts with) YWHAG	FALSE	interacts with	KIAA1598 (interacts with) YWHAG
278987	164.0068221	interacts with	EIF2AK2 (interacts with) RAC1	FALSE	interacts with	EIF2AK2 (interacts with) RAC1
278988	120.6406564	interacts with	EIF2AK2 (interacts with) IKBKB	FALSE	interacts with	EIF2AK2 (interacts with) IKBKB
278989	528.6602682	interacts with	EIF2AK2 (interacts with) PPP1CA	FALSE	interacts with	EIF2AK2 (interacts with) PPP1CA
278985	224.3510636	interacts with	EIF2AK2 (interacts with) HSPCA	FALSE	interacts with	EIF2AK2 (interacts with) HSPCA
278986	132.3125974	interacts with	EIF2AK2 (interacts with) STAT3	FALSE	interacts with	EIF2AK2 (interacts with) STAT3
246226	268.2899869	interacts with	FLJ21908 (interacts with) TGFBR1	FALSE	interacts with	FLJ21908 (interacts with) TGFBR1
278996	138.7446177	interacts with	EIF2AK2 (interacts with) MAP3K5	FALSE	interacts with	EIF2AK2 (interacts with) MAP3K5
246225	1335.167975	interacts with	FLJ21908 (interacts with) IKBKG	FALSE	interacts with	FLJ21908 (interacts with) IKBKG
278998	423.7434535	interacts with	EIF2AK2 (interacts with) TP53	FALSE	interacts with	EIF2AK2 (interacts with) TP53
278991	120.3769944	interacts with	EIF2AK2 (interacts with) MAP3K7	FALSE	interacts with	EIF2AK2 (interacts with) MAP3K7
246230	976.1520817	interacts with	FLJ21908 (interacts with) PPP1CA	FALSE	interacts with	FLJ21908 (interacts with) PPP1CA
278992	134.3133086	interacts with	EIF2AK2 (interacts with) HSPA1A	FALSE	interacts with	EIF2AK2 (interacts with) HSPA1A
246228	229.2923822	interacts with	FLJ21908 (interacts with) MAP3K3	FALSE	interacts with	FLJ21908 (interacts with) MAP3K3
278994	135.3993453	interacts with	EIF2AK2 (interacts with) HSP90AA1	FALSE	interacts with	EIF2AK2 (interacts with) HSP90AA1
246227	194.2398972	interacts with	FLJ21908 (interacts with) POLR2A	FALSE	interacts with	FLJ21908 (interacts with) POLR2A
246234	73.75512306	interacts with	FLJ21908 (interacts with) POLR2E	FALSE	interacts with	FLJ21908 (interacts with) POLR2E
246233	75.86988678	interacts with	FLJ21908 (interacts with) POLR2B	FALSE	interacts with	FLJ21908 (interacts with) POLR2B
246231	164.2279567	interacts with	FLJ21908 (interacts with) HSPCB	FALSE	interacts with	FLJ21908 (interacts with) HSPCB
278999	93.22832036	interacts with	EIF2AK2 (interacts with) PPP1CC	FALSE	interacts with	EIF2AK2 (interacts with) PPP1CC
246242	99.42824551	interacts with	FLJ21908 (interacts with) HSPA6	FALSE	interacts with	FLJ21908 (interacts with) HSPA6
279012	183.6573455	interacts with	EIF2AK2 (interacts with) NFKBIA	FALSE	interacts with	EIF2AK2 (interacts with) NFKBIA
246245	154.7384492	interacts with	FLJ21908 (interacts with) RUVBL2	FALSE	interacts with	FLJ21908 (interacts with) RUVBL2
246244	143.0919346	interacts with	FLJ21908 (interacts with) POLR3A	FALSE	interacts with	FLJ21908 (interacts with) POLR3A
246243	178.5040596	interacts with	FLJ21908 (interacts with) UXT	FALSE	interacts with	FLJ21908 (interacts with) UXT
229866	183.6952386	interacts with	GUCY1A2 (interacts with) STUB1	FALSE	interacts with	GUCY1A2 (interacts with) STUB1
229865	284.4820226	interacts with	GUCY1A2 (interacts with) HSPA4	FALSE	interacts with	GUCY1A2 (interacts with) HSPA4
246249	73.19897041	interacts with	FLJ21908 (interacts with) HSPCAL3	FALSE	interacts with	FLJ21908 (interacts with) HSPCAL3
229864	340.4908384	interacts with	GUCY1A2 (interacts with) HSPCA	FALSE	interacts with	GUCY1A2 (interacts with) HSPCA
229863	1031.381774	interacts with	GUCY1A2 (interacts with) UBC	FALSE	interacts with	GUCY1A2 (interacts with) UBC
279015	276.8316402	interacts with	EIF2AK2 (interacts with) TARBP2	FALSE	interacts with	EIF2AK2 (interacts with) TARBP2
229868	8.53551625	interacts with	GUCY1A2 (interacts with) GUCY1B3	FALSE	interacts with	GUCY1A2 (interacts with) GUCY1B3
262643	278.0210053	interacts with	ACTG1 (interacts with) TRAF6	FALSE	interacts with	ACTG1 (interacts with) TRAF6
262644	961.3095079	interacts with	ACTG1 (interacts with) IKBKG	FALSE	interacts with	ACTG1 (interacts with) IKBKG
262645	196.7673928	interacts with	ACTG1 (interacts with) IKBKE	FALSE	interacts with	ACTG1 (interacts with) IKBKE
262646	130.8467383	interacts with	ACTG1 (interacts with) TRAF2	FALSE	interacts with	ACTG1 (interacts with) TRAF2
262651	149.6072002	interacts with	ACTG1 (interacts with) MAP3K3	FALSE	interacts with	ACTG1 (interacts with) MAP3K3
262652	91.8006917	interacts with	ACTG1 (interacts with) TNFRSF1A	FALSE	interacts with	ACTG1 (interacts with) TNFRSF1A
262653	120.6082643	interacts with	ACTG1 (interacts with) CDH1	FALSE	interacts with	ACTG1 (interacts with) CDH1
262647	114.4473855	interacts with	ACTG1 (interacts with) NFKBIA	FALSE	interacts with	ACTG1 (interacts with) NFKBIA
262648	97.37992643	interacts with	ACTG1 (interacts with) NFKB1	FALSE	interacts with	ACTG1 (interacts with) NFKB1
262649	95.03240499	interacts with	ACTG1 (interacts with) CHUK	FALSE	interacts with	ACTG1 (interacts with) CHUK
262650	109.7559712	interacts with	ACTG1 (interacts with) IKBKB	FALSE	interacts with	ACTG1 (interacts with) IKBKB
262659	179.2037672	interacts with	ACTG1 (interacts with) HTATIP	FALSE	interacts with	ACTG1 (interacts with) HTATIP
262660	78.27344367	interacts with	ACTG1 (interacts with) TNFRSF1B	FALSE	interacts with	ACTG1 (interacts with) TNFRSF1B
262655	83.6935293	interacts with	ACTG1 (interacts with) MAP3K14	FALSE	interacts with	ACTG1 (interacts with) MAP3K14
262656	129.3461782	interacts with	ACTG1 (interacts with) RUVBL2	FALSE	interacts with	ACTG1 (interacts with) RUVBL2
262657	122.4266533	interacts with	ACTG1 (interacts with) MLH1	FALSE	interacts with	ACTG1 (interacts with) MLH1
262658	60.69341545	interacts with	ACTG1 (interacts with) RIPK1	FALSE	interacts with	ACTG1 (interacts with) RIPK1
262669	51.48080689	interacts with	ACTG1 (interacts with) NFKBIB	FALSE	interacts with	ACTG1 (interacts with) NFKBIB
262663	69.38903461	interacts with	ACTG1 (interacts with) HSPCB	FALSE	interacts with	ACTG1 (interacts with) HSPCB
262678	108.6102678	interacts with	ACTG1 (interacts with) TRAF3IP1	FALSE	interacts with	ACTG1 (interacts with) TRAF3IP1
262672	124.3684804	interacts with	ACTG1 (interacts with) SUMO4	FALSE	interacts with	ACTG1 (interacts with) SUMO4
262673	68.27781612	interacts with	ACTG1 (interacts with) RIPK2	FALSE	interacts with	ACTG1 (interacts with) RIPK2
213529	1844	interacts with	ATCAY (interacts with) STUB1	FALSE	interacts with	ATCAY (interacts with) STUB1
262687	359.9753603	interacts with	ACTG1 (interacts with) ITGB3BP	FALSE	interacts with	ACTG1 (interacts with) ITGB3BP
229927	1844	interacts with	RPIP8 (interacts with) TFPT	FALSE	interacts with	RPIP8 (interacts with) TFPT
262723	725.6500964	interacts with	ACTG1 (interacts with) PPP1R9A	FALSE	interacts with	ACTG1 (interacts with) PPP1R9A
279107	1844	interacts with	RAB1A (interacts with) TBC1D17	FALSE	interacts with	RAB1A (interacts with) TBC1D17
279108	1842	interacts with	RAB1A (interacts with) RABGGTB	FALSE	interacts with	RAB1A (interacts with) RABGGTB
279109	681.4608473	interacts with	RAB1A (interacts with) RABIF	FALSE	interacts with	RAB1A (interacts with) RABIF
279110	377.5793923	interacts with	RAB1A (interacts with) RUSC2	FALSE	interacts with	RAB1A (interacts with) RUSC2
279104	1844	interacts with	RAB1A (interacts with) SYT5	FALSE	interacts with	RAB1A (interacts with) SYT5
279105	463.9632421	interacts with	RAB1A (interacts with) RABEP1	FALSE	interacts with	RAB1A (interacts with) RABEP1
279106	2438.459374	interacts with	RAB1A (interacts with) VDP	FALSE	interacts with	RAB1A (interacts with) VDP
213578	435.2543595	interacts with	HSPH1 (interacts with) YWHAZ	FALSE	interacts with	HSPH1 (interacts with) YWHAZ
279115	1844	interacts with	RAB1A (interacts with) ZNF593	FALSE	interacts with	RAB1A (interacts with) ZNF593
279116	1844	interacts with	RAB1A (interacts with) RABGGTA	FALSE	interacts with	RAB1A (interacts with) RABGGTA
279117	534.4541606	interacts with	GOLGA5 (interacts with) OCRL	FALSE	interacts with	GOLGA5 (interacts with) OCRL
279118	1309.545839	interacts with	GOLGA5 (interacts with) RAB1A	FALSE	interacts with	GOLGA5 (interacts with) RAB1A
279111	383.2681912	interacts with	RAB1A (interacts with) RABAC1	FALSE	interacts with	RAB1A (interacts with) RABAC1
279112	347.1060321	interacts with	RAB1A (interacts with) USO1	FALSE	interacts with	RAB1A (interacts with) USO1
213580	143.4704783	interacts with	HSPH1 (interacts with) TERF1	FALSE	interacts with	HSPH1 (interacts with) TERF1
279113	1844	interacts with	RAB1A (interacts with) SLC16A8	FALSE	interacts with	RAB1A (interacts with) SLC16A8
213579	100.1791159	interacts with	HSPH1 (interacts with) TERF2	FALSE	interacts with	HSPH1 (interacts with) TERF2
279114	1844	interacts with	RAB1A (interacts with) RFK	FALSE	interacts with	RAB1A (interacts with) RFK
213586	98.48097495	interacts with	HSPH1 (interacts with) UBE1	FALSE	interacts with	HSPH1 (interacts with) UBE1
230010	288.3966214	interacts with	TP53I3 (interacts with) UNC119	FALSE	interacts with	TP53I3 (interacts with) UNC119
230014	607.0335111	interacts with	FUNDC2 (interacts with) SAT1	FALSE	interacts with	FUNDC2 (interacts with) SAT1
230013	539.9963908	interacts with	FUNDC2 (interacts with) SAT	FALSE	interacts with	FUNDC2 (interacts with) SAT
230011	87.88873038	interacts with	TP53I3 (interacts with) UBR1	FALSE	interacts with	TP53I3 (interacts with) UBR1
246402	79.51153682	interacts with	CYLD (interacts with) RIPK1	FALSE	interacts with	CYLD (interacts with) RIPK1
246401	132.9505773	interacts with	CYLD (interacts with) PLK1	FALSE	interacts with	CYLD (interacts with) PLK1
230016	617.7467991	interacts with	FUNDC2 (interacts with) ITGB3BP	FALSE	interacts with	FUNDC2 (interacts with) ITGB3BP
246400	168.1581893	interacts with	CYLD (interacts with) TRAF2	FALSE	interacts with	CYLD (interacts with) TRAF2
246399	223.1425322	interacts with	CYLD (interacts with) IKBKE	FALSE	interacts with	CYLD (interacts with) IKBKE
246405	99.65878621	interacts with	CYLD (interacts with) TUBA3	FALSE	interacts with	CYLD (interacts with) TUBA3
230020	162.9746751	interacts with	FUNDC2 (interacts with) TP53I3	FALSE	interacts with	FUNDC2 (interacts with) TP53I3
246404	67.56227089	interacts with	CYLD (interacts with) TBK1	FALSE	interacts with	CYLD (interacts with) TBK1
246403	92.10735436	interacts with	CYLD (interacts with) MAP3K7	FALSE	interacts with	CYLD (interacts with) MAP3K7
246409	320.0575523	interacts with	CYLD (interacts with) TRAF6	FALSE	interacts with	CYLD (interacts with) TRAF6
246412	47.82911148	interacts with	CYLD (interacts with) MYO6	FALSE	interacts with	CYLD (interacts with) MYO6
246422	681.6675852	interacts with	CYLD (interacts with) IKBKG	FALSE	interacts with	CYLD (interacts with) IKBKG
246442	280.9126994	interacts with	H1F0 (interacts with) KPNA2	FALSE	interacts with	H1F0 (interacts with) KPNA2
246441	353.7810234	interacts with	H1F0 (interacts with) KPNB1	FALSE	interacts with	H1F0 (interacts with) KPNB1
246440	1324.294516	interacts with	H1F0 (interacts with) IKBKG	FALSE	interacts with	H1F0 (interacts with) IKBKG
246443	77.47784255	interacts with	H1F0 (interacts with) IPO7	FALSE	interacts with	H1F0 (interacts with) IPO7
230105	131.0049082	interacts with	POLR2B (interacts with) RUVBL2	FALSE	interacts with	POLR2B (interacts with) RUVBL2
230104	1089.672677	interacts with	POLR2B (interacts with) UBC	FALSE	interacts with	POLR2B (interacts with) UBC
230108	538.1127979	interacts with	POLR2B (interacts with) TCEA1	FALSE	interacts with	POLR2B (interacts with) TCEA1
230107	57.61319407	interacts with	POLR2B (interacts with) POLR2E	FALSE	interacts with	POLR2B (interacts with) POLR2E
230113	153.2402158	interacts with	POLR2B (interacts with) PRO2730	FALSE	interacts with	POLR2B (interacts with) PRO2730
262881	1362.515201	interacts with	GOLGA3 (interacts with) IKBKG	FALSE	interacts with	GOLGA3 (interacts with) IKBKG
262882	481.4847991	interacts with	GOLGA3 (interacts with) TRAF2	FALSE	interacts with	GOLGA3 (interacts with) TRAF2
230115	58.40546997	interacts with	POLR2B (interacts with) POLR2D	FALSE	interacts with	POLR2B (interacts with) POLR2D
230119	75.1324901	interacts with	POLR2B (interacts with) POLR2C	FALSE	interacts with	POLR2B (interacts with) POLR2C
230126	250.2962177	interacts with	TP73 (interacts with) TPM3	FALSE	interacts with	TP73 (interacts with) TPM3
230125	1161.436421	interacts with	TP73 (interacts with) UBC	FALSE	interacts with	TP73 (interacts with) UBC
230124	115.6377132	interacts with	TP73 (interacts with) UBE2I	FALSE	interacts with	TP73 (interacts with) UBE2I
279316	3006.726353	interacts with	F8 (interacts with) HSPA5	FALSE	interacts with	F8 (interacts with) HSPA5
262939	220.2884215	interacts with	IPO7 (interacts with) TRAF6	FALSE	interacts with	IPO7 (interacts with) TRAF6
262940	65.78149849	interacts with	IPO7 (interacts with) TNFRSF1B	FALSE	interacts with	IPO7 (interacts with) TNFRSF1B
279320	1735.711996	interacts with	F8 (interacts with) LMAN1	FALSE	interacts with	F8 (interacts with) LMAN1
279321	519.803022	interacts with	F8 (interacts with) MCFD2	FALSE	interacts with	F8 (interacts with) MCFD2
262937	773.9078193	interacts with	IPO7 (interacts with) UBC	FALSE	interacts with	IPO7 (interacts with) UBC
262938	199.8728923	interacts with	IPO7 (interacts with) YWHAZ	FALSE	interacts with	IPO7 (interacts with) YWHAZ
262946	167.3338505	interacts with	IPO7 (interacts with) KPNB1	FALSE	interacts with	IPO7 (interacts with) KPNB1
246598	1844	interacts with	ITFG2 (interacts with) TNK2	FALSE	interacts with	ITFG2 (interacts with) TNK2
213866	480.4247524	interacts with	N4BP1 (interacts with) SUMO1	FALSE	interacts with	N4BP1 (interacts with) SUMO1
213865	1779.154709	interacts with	N4BP1 (interacts with) UBC	FALSE	interacts with	N4BP1 (interacts with) UBC
263025	164.5116269	interacts with	PRO2730 (interacts with) WDR5	FALSE	interacts with	PRO2730 (interacts with) WDR5
263044	350.838574	interacts with	OCRL (interacts with) RAB1A	FALSE	interacts with	OCRL (interacts with) RAB1A
279429	139.0208576	interacts with	BRCA1 (interacts with) HDAC1	FALSE	interacts with	BRCA1 (interacts with) HDAC1
263042	887.0370983	interacts with	OCRL (interacts with) RAC1	FALSE	interacts with	OCRL (interacts with) RAC1
279435	131.4258226	interacts with	BRCA1 (interacts with) HDAC2	FALSE	interacts with	BRCA1 (interacts with) HDAC2
279437	149.0353549	interacts with	BRCA1 (interacts with) SMAD4	FALSE	interacts with	BRCA1 (interacts with) SMAD4
279438	147.0266677	interacts with	BRCA1 (interacts with) RELA	FALSE	interacts with	BRCA1 (interacts with) RELA
279431	268.6991504	interacts with	BRCA1 (interacts with) SRC	FALSE	interacts with	BRCA1 (interacts with) SRC
279432	142.475126	interacts with	BRCA1 (interacts with) SMAD2	FALSE	interacts with	BRCA1 (interacts with) SMAD2
279433	139.719128	interacts with	BRCA1 (interacts with) SMAD3	FALSE	interacts with	BRCA1 (interacts with) SMAD3
279434	840.6814896	interacts with	BRCA1 (interacts with) UBC	FALSE	interacts with	BRCA1 (interacts with) UBC
279445	136.6205441	interacts with	BRCA1 (interacts with) NFKB1	FALSE	interacts with	BRCA1 (interacts with) NFKB1
279439	204.5941399	interacts with	BRCA1 (interacts with) UBE2I	FALSE	interacts with	BRCA1 (interacts with) UBE2I
279441	302.4271619	interacts with	BRCA1 (interacts with) CSNK2A1	FALSE	interacts with	BRCA1 (interacts with) CSNK2A1
279442	145.9740889	interacts with	BRCA1 (interacts with) STAT3	FALSE	interacts with	BRCA1 (interacts with) STAT3
279452	265.9018905	interacts with	BRCA1 (interacts with) MAP3K3	FALSE	interacts with	BRCA1 (interacts with) MAP3K3
279454	193.5114608	interacts with	BRCA1 (interacts with) SUMO2	FALSE	interacts with	BRCA1 (interacts with) SUMO2
279448	280.2970867	interacts with	BRCA1 (interacts with) TERF2	FALSE	interacts with	BRCA1 (interacts with) TERF2
279449	162.5482876	interacts with	BRCA1 (interacts with) JAK2	FALSE	interacts with	BRCA1 (interacts with) JAK2
279450	133.2237551	interacts with	BRCA1 (interacts with) HSPA8	FALSE	interacts with	BRCA1 (interacts with) HSPA8
279459	100.0552465	interacts with	BRCA1 (interacts with) CDC2	FALSE	interacts with	BRCA1 (interacts with) CDC2
279460	184.6811176	interacts with	BRCA1 (interacts with) TERF1	FALSE	interacts with	BRCA1 (interacts with) TERF1
279461	136.6797405	interacts with	BRCA1 (interacts with) TUBB	FALSE	interacts with	BRCA1 (interacts with) TUBB
279462	221.1276571	interacts with	BRCA1 (interacts with) CREB1	FALSE	interacts with	BRCA1 (interacts with) CREB1
197542	487.2277077	interacts with	H2-ALPHA (interacts with) IKBKG	FALSE	interacts with	H2-ALPHA (interacts with) IKBKG
197540	206.298241	interacts with	H2-ALPHA (interacts with) TRAF6	FALSE	interacts with	H2-ALPHA (interacts with) TRAF6
279457	129.7216937	interacts with	BRCA1 (interacts with) PRKDC	FALSE	interacts with	BRCA1 (interacts with) PRKDC
279458	185.4929417	interacts with	BRCA1 (interacts with) CDK1	FALSE	interacts with	BRCA1 (interacts with) CDK1
197546	87.27314815	interacts with	H2-ALPHA (interacts with) TRAF2	FALSE	interacts with	H2-ALPHA (interacts with) TRAF2
279468	188.0923067	interacts with	BRCA1 (interacts with) VCP	FALSE	interacts with	BRCA1 (interacts with) VCP
197544	131.9082786	interacts with	H2-ALPHA (interacts with) IKBKE	FALSE	interacts with	H2-ALPHA (interacts with) IKBKE
279470	220.1055946	interacts with	BRCA1 (interacts with) TAF9	FALSE	interacts with	BRCA1 (interacts with) TAF9
197550	114.8283736	interacts with	H2-ALPHA (interacts with) NFKB1	FALSE	interacts with	H2-ALPHA (interacts with) NFKB1
197548	111.0453624	interacts with	H2-ALPHA (interacts with) NFKBIA	FALSE	interacts with	H2-ALPHA (interacts with) NFKBIA
279466	232.6419003	interacts with	BRCA1 (interacts with) UBB	FALSE	interacts with	BRCA1 (interacts with) UBB
197554	121.853014	interacts with	H2-ALPHA (interacts with) IKBKB	FALSE	interacts with	H2-ALPHA (interacts with) IKBKB
197552	149.7927496	interacts with	H2-ALPHA (interacts with) MAP3K3	FALSE	interacts with	H2-ALPHA (interacts with) MAP3K3
279472	178.4745083	interacts with	BRCA1 (interacts with) SMARCA2	FALSE	interacts with	BRCA1 (interacts with) SMARCA2
197557	62.94591581	interacts with	H2-ALPHA (interacts with) TNFRSF1A	FALSE	interacts with	H2-ALPHA (interacts with) TNFRSF1A
279474	140.9076195	interacts with	BRCA1 (interacts with) CCNE1	FALSE	interacts with	BRCA1 (interacts with) CCNE1
279483	160.2083485	interacts with	BRCA1 (interacts with) JUN	FALSE	interacts with	BRCA1 (interacts with) JUN
197561	40.51241068	interacts with	H2-ALPHA (interacts with) RIPK1	FALSE	interacts with	H2-ALPHA (interacts with) RIPK1
279485	310.7455248	interacts with	BRCA1 (interacts with) RPA1	FALSE	interacts with	BRCA1 (interacts with) RPA1
197559	57.51409981	interacts with	H2-ALPHA (interacts with) MAP3K14	FALSE	interacts with	H2-ALPHA (interacts with) MAP3K14
197565	59.81915998	interacts with	H2-ALPHA (interacts with) TNFRSF1B	FALSE	interacts with	H2-ALPHA (interacts with) TNFRSF1B
197563	55.15518972	interacts with	H2-ALPHA (interacts with) NFKB2	FALSE	interacts with	H2-ALPHA (interacts with) NFKB2
279491	215.1546018	interacts with	BRCA1 (interacts with) PIAS4	FALSE	interacts with	BRCA1 (interacts with) PIAS4
197569	29.4155195	interacts with	H2-ALPHA (interacts with) TBK1	FALSE	interacts with	H2-ALPHA (interacts with) TBK1
279492	405.1821899	interacts with	BRCA1 (interacts with) WDR48	FALSE	interacts with	BRCA1 (interacts with) WDR48
279494	152.7945112	interacts with	BRCA1 (interacts with) RBL2	FALSE	interacts with	BRCA1 (interacts with) RBL2
279499	157.4278084	interacts with	BRCA1 (interacts with) SUMO1	FALSE	interacts with	BRCA1 (interacts with) SUMO1
197577	31.46585498	interacts with	H2-ALPHA (interacts with) NFKBIB	FALSE	interacts with	H2-ALPHA (interacts with) NFKBIB
197579	48.23540538	interacts with	H2-ALPHA (interacts with) RIPK2	FALSE	interacts with	H2-ALPHA (interacts with) RIPK2
197589	24.56088089	interacts with	H2-ALPHA (interacts with) TANK	FALSE	interacts with	H2-ALPHA (interacts with) TANK
197587	23.10600745	interacts with	H2-ALPHA (interacts with) NFKBIE	FALSE	interacts with	H2-ALPHA (interacts with) NFKBIE
279518	190.3116041	interacts with	BRCA1 (interacts with) STK6	FALSE	interacts with	BRCA1 (interacts with) STK6
197598	65.37530201	interacts with	RPS16 (interacts with) TNFRSF1A	FALSE	interacts with	RPS16 (interacts with) TNFRSF1A
197595	668.1286543	interacts with	RPS16 (interacts with) UBC	FALSE	interacts with	RPS16 (interacts with) UBC
197601	59.76977582	interacts with	RPS16 (interacts with) TNFRSF1B	FALSE	interacts with	RPS16 (interacts with) TNFRSF1B
197600	112.7115599	interacts with	RPS16 (interacts with) TERF1	FALSE	interacts with	RPS16 (interacts with) TERF1
279520	101.9778488	interacts with	BRCA1 (interacts with) NCOA3	FALSE	interacts with	BRCA1 (interacts with) NCOA3
279521	183.2656291	interacts with	BRCA1 (interacts with) PPP1CB	FALSE	interacts with	BRCA1 (interacts with) PPP1CB
279522	154.8260533	interacts with	BRCA1 (interacts with) PPP1CC	FALSE	interacts with	BRCA1 (interacts with) PPP1CC
279532	129.5766556	interacts with	BRCA1 (interacts with) FOXO3A	FALSE	interacts with	BRCA1 (interacts with) FOXO3A
279542	1645.085115	interacts with	BRCA1 (interacts with) PPP1CA	FALSE	interacts with	BRCA1 (interacts with) PPP1CA
214006	614.567602	interacts with	HDAC2 (interacts with) IKBKE	FALSE	interacts with	HDAC2 (interacts with) IKBKE
214005	198.7951685	interacts with	HDAC2 (interacts with) MYC	FALSE	interacts with	HDAC2 (interacts with) MYC
214004	204.5402785	interacts with	HDAC2 (interacts with) SMAD2	FALSE	interacts with	HDAC2 (interacts with) SMAD2
214010	278.518118	interacts with	HDAC2 (interacts with) NFKBIA	FALSE	interacts with	HDAC2 (interacts with) NFKBIA
214009	138.1869559	interacts with	HDAC2 (interacts with) NR3C1	FALSE	interacts with	HDAC2 (interacts with) NR3C1
279548	244.2006927	interacts with	BRCA1 (interacts with) UBE2D3	FALSE	interacts with	BRCA1 (interacts with) UBE2D3
214008	166.7484637	interacts with	HDAC2 (interacts with) STAT3	FALSE	interacts with	HDAC2 (interacts with) STAT3
279549	121.4401371	interacts with	BRCA1 (interacts with) CDK2	FALSE	interacts with	BRCA1 (interacts with) CDK2
279543	631.1073127	interacts with	BRCA1 (interacts with) CLSPN	FALSE	interacts with	BRCA1 (interacts with) CLSPN
214014	131.5960236	interacts with	HDAC2 (interacts with) SUMO2	FALSE	interacts with	HDAC2 (interacts with) SUMO2
230398	19.4796721	interacts with	MTA1 (interacts with) MTA2	FALSE	interacts with	MTA1 (interacts with) MTA2
214013	113.4703627	interacts with	HDAC2 (interacts with) HIST1H3A	FALSE	interacts with	HDAC2 (interacts with) HIST1H3A
230397	97.28895607	interacts with	MTA1 (interacts with) SUMO2	FALSE	interacts with	MTA1 (interacts with) SUMO2
279545	170.7615705	interacts with	BRCA1 (interacts with) TP53	FALSE	interacts with	BRCA1 (interacts with) TP53
230396	85.45044246	interacts with	MTA1 (interacts with) SIN3A	FALSE	interacts with	MTA1 (interacts with) SIN3A
214011	181.2629263	interacts with	HDAC2 (interacts with) NFKB1	FALSE	interacts with	HDAC2 (interacts with) NFKB1
279546	105.0152819	interacts with	BRCA1 (interacts with) SP1	FALSE	interacts with	BRCA1 (interacts with) SP1
214018	239.6431133	interacts with	HDAC2 (interacts with) HSPA4	FALSE	interacts with	HDAC2 (interacts with) HSPA4
214017	143.5815494	interacts with	HDAC2 (interacts with) VDR	FALSE	interacts with	HDAC2 (interacts with) VDR
230400	585.3794346	interacts with	MTA1 (interacts with) TP53	FALSE	interacts with	MTA1 (interacts with) TP53
214015	258.550224	interacts with	HDAC2 (interacts with) RUVBL2	FALSE	interacts with	HDAC2 (interacts with) RUVBL2
263167	697.9860593	interacts with	PRKCB1 (interacts with) UBC	FALSE	interacts with	PRKCB1 (interacts with) UBC
263168	166.1255088	interacts with	PRKCB1 (interacts with) YWHAG	FALSE	interacts with	PRKCB1 (interacts with) YWHAG
263169	112.2265926	interacts with	PRKCB1 (interacts with) STAT3	FALSE	interacts with	PRKCB1 (interacts with) STAT3
230408	70.29417566	interacts with	MTA1 (interacts with) PARK7	FALSE	interacts with	MTA1 (interacts with) PARK7
214023	100.4148741	interacts with	HDAC2 (interacts with) TP73	FALSE	interacts with	HDAC2 (interacts with) TP73
214028	626.2758468	interacts with	HDAC2 (interacts with) SMN1	FALSE	interacts with	HDAC2 (interacts with) SMN1
279561	172.508009	interacts with	BRCA1 (interacts with) CCNB1	FALSE	interacts with	BRCA1 (interacts with) CCNB1
214033	118.5262924	interacts with	HDAC2 (interacts with) PIAS4	FALSE	interacts with	HDAC2 (interacts with) PIAS4
214031	84.44940534	interacts with	HDAC2 (interacts with) RUNX1	FALSE	interacts with	HDAC2 (interacts with) RUNX1
279569	260.2879902	interacts with	BRCA1 (interacts with) KPNA2	FALSE	interacts with	BRCA1 (interacts with) KPNA2
214035	66.84469049	interacts with	HDAC2 (interacts with) MEN1	FALSE	interacts with	HDAC2 (interacts with) MEN1
279580	211.5293332	interacts with	BRCA1 (interacts with) MLH1	FALSE	interacts with	BRCA1 (interacts with) MLH1
214040	121.6111255	interacts with	HDAC2 (interacts with) TAF6	FALSE	interacts with	HDAC2 (interacts with) TAF6
214044	151.0077722	interacts with	HDAC2 (interacts with) SKIIP	FALSE	interacts with	HDAC2 (interacts with) SKIIP
279587	105.3474268	interacts with	BRCA1 (interacts with) CREBBP	FALSE	interacts with	BRCA1 (interacts with) CREBBP
214049	586.4173074	interacts with	HDAC2 (interacts with) UBE2E2	FALSE	interacts with	HDAC2 (interacts with) UBE2E2
214047	180.2578358	interacts with	HDAC2 (interacts with) STK6	FALSE	interacts with	HDAC2 (interacts with) STK6
214054	221.9596005	interacts with	HDAC2 (interacts with) PA2G4	FALSE	interacts with	HDAC2 (interacts with) PA2G4
279585	97.41192922	interacts with	BRCA1 (interacts with) RB1	FALSE	interacts with	BRCA1 (interacts with) RB1
279586	135.7328761	interacts with	BRCA1 (interacts with) MYC	FALSE	interacts with	BRCA1 (interacts with) MYC
279595	204.3144728	interacts with	BRCA1 (interacts with) CHEK2	FALSE	interacts with	BRCA1 (interacts with) CHEK2
279591	720.1659926	interacts with	BRCA1 (interacts with) CSTF2	FALSE	interacts with	BRCA1 (interacts with) CSTF2
279593	161.1814488	interacts with	BRCA1 (interacts with) TUBG1	FALSE	interacts with	BRCA1 (interacts with) TUBG1
214059	293.2330306	interacts with	HDAC2 (interacts with) PPP1R8	FALSE	interacts with	HDAC2 (interacts with) PPP1R8
279603	245.9080999	interacts with	BRCA1 (interacts with) POLR2A	FALSE	interacts with	BRCA1 (interacts with) POLR2A
214064	158.7769404	interacts with	HDAC2 (interacts with) PARK7	FALSE	interacts with	HDAC2 (interacts with) PARK7
279599	130.9643512	interacts with	BRCA1 (interacts with) H2AFX	FALSE	interacts with	BRCA1 (interacts with) H2AFX
279600	149.017688	interacts with	BRCA1 (interacts with) ESR1	FALSE	interacts with	BRCA1 (interacts with) ESR1
279601	129.5883905	interacts with	BRCA1 (interacts with) FANCD2	FALSE	interacts with	BRCA1 (interacts with) FANCD2
214067	123.7592787	interacts with	HDAC2 (interacts with) PARP1	FALSE	interacts with	HDAC2 (interacts with) PARP1
279611	94.64556938	interacts with	BRCA1 (interacts with) MSH2	FALSE	interacts with	BRCA1 (interacts with) MSH2
279614	160.7754082	interacts with	BRCA1 (interacts with) CDK4	FALSE	interacts with	BRCA1 (interacts with) CDK4
279610	250.8986151	interacts with	BRCA1 (interacts with) UBE2D1	FALSE	interacts with	BRCA1 (interacts with) UBE2D1
279622	1148.314927	interacts with	BARD1 (interacts with) UBC	FALSE	interacts with	BARD1 (interacts with) UBC
279616	211.3952797	interacts with	BRCA1 (interacts with) UBE1	FALSE	interacts with	BRCA1 (interacts with) UBE1
279617	163.7578587	interacts with	BRCA1 (interacts with) RAD51	FALSE	interacts with	BRCA1 (interacts with) RAD51
279627	163.3904941	interacts with	BARD1 (interacts with) POLR2A	FALSE	interacts with	BARD1 (interacts with) POLR2A
263243	2252.491907	interacts with	CASP8 (interacts with) IKBKG	FALSE	interacts with	CASP8 (interacts with) IKBKG
214090	329.2694683	interacts with	HDAC2 (interacts with) IKZF1	FALSE	interacts with	HDAC2 (interacts with) IKZF1
263244	206.2239938	interacts with	CASP8 (interacts with) RB1	FALSE	interacts with	CASP8 (interacts with) RB1
279629	63.89869239	interacts with	BARD1 (interacts with) RAD51	FALSE	interacts with	BARD1 (interacts with) RAD51
263245	185.2224415	interacts with	CASP8 (interacts with) MAPK1	FALSE	interacts with	CASP8 (interacts with) MAPK1
279630	167.5689627	interacts with	BARD1 (interacts with) UBE2D2	FALSE	interacts with	BARD1 (interacts with) UBE2D2
263246	142.1278898	interacts with	CASP8 (interacts with) SUMO1	FALSE	interacts with	CASP8 (interacts with) SUMO1
279623	148.1471778	interacts with	BARD1 (interacts with) RELA	FALSE	interacts with	BARD1 (interacts with) RELA
279624	209.9827146	interacts with	BARD1 (interacts with) PCNA	FALSE	interacts with	BARD1 (interacts with) PCNA
279625	256.1629673	interacts with	BARD1 (interacts with) TP53	FALSE	interacts with	BARD1 (interacts with) TP53
279626	253.2468313	interacts with	BARD1 (interacts with) NFKBIA	FALSE	interacts with	BARD1 (interacts with) NFKBIA
263242	345.2463163	interacts with	CASP8 (interacts with) FYN	FALSE	interacts with	CASP8 (interacts with) FYN
279635	135.6376738	interacts with	BARD1 (interacts with) RIF1	FALSE	interacts with	BARD1 (interacts with) RIF1
263251	256.0429258	interacts with	CASP8 (interacts with) MAP3K14	FALSE	interacts with	CASP8 (interacts with) MAP3K14
263252	153.1370636	interacts with	CASP8 (interacts with) MAPT	FALSE	interacts with	CASP8 (interacts with) MAPT
279638	156.9568295	interacts with	BARD1 (interacts with) PTN	FALSE	interacts with	BARD1 (interacts with) PTN
263254	1958.682955	interacts with	CASP8 (interacts with) CHD3	FALSE	interacts with	CASP8 (interacts with) CHD3
263247	133.0610115	interacts with	CASP8 (interacts with) MAPK3	FALSE	interacts with	CASP8 (interacts with) MAPK3
279632	78.3527633	interacts with	BARD1 (interacts with) HTATIP	FALSE	interacts with	BARD1 (interacts with) HTATIP
214101	89.96407642	interacts with	HDAC2 (interacts with) SMARCA2	FALSE	interacts with	HDAC2 (interacts with) SMARCA2
263248	202.2378929	interacts with	CASP8 (interacts with) CHUK	FALSE	interacts with	CASP8 (interacts with) CHUK
214100	271.152612	interacts with	HDAC2 (interacts with) TP53	FALSE	interacts with	HDAC2 (interacts with) TP53
263249	217.8510744	interacts with	CASP8 (interacts with) IKBKB	FALSE	interacts with	CASP8 (interacts with) IKBKB
279634	614.3898008	interacts with	BARD1 (interacts with) CHD3	FALSE	interacts with	BARD1 (interacts with) CHD3
263250	147.7281469	interacts with	CASP8 (interacts with) CDH1	FALSE	interacts with	CASP8 (interacts with) CDH1
279643	191.9684762	interacts with	BARD1 (interacts with) GIT1	FALSE	interacts with	BARD1 (interacts with) GIT1
263259	333.9893899	interacts with	CASP8 (interacts with) ILK	FALSE	interacts with	CASP8 (interacts with) ILK
263260	226.9084616	interacts with	CASP8 (interacts with) SRF	FALSE	interacts with	CASP8 (interacts with) SRF
279645	69.7358792	interacts with	BARD1 (interacts with) PIAS4	FALSE	interacts with	BARD1 (interacts with) PIAS4
263262	179.1765465	interacts with	CASP8 (interacts with) HD	FALSE	interacts with	CASP8 (interacts with) HD
279646	107.6501717	interacts with	BARD1 (interacts with) TCERG1	FALSE	interacts with	BARD1 (interacts with) TCERG1
279641	90.94805372	interacts with	BARD1 (interacts with) KAT5	FALSE	interacts with	BARD1 (interacts with) KAT5
263257	220.0103346	interacts with	CASP8 (interacts with) PARK2	FALSE	interacts with	CASP8 (interacts with) PARK2
263258	104.1562744	interacts with	CASP8 (interacts with) TRIM28	FALSE	interacts with	CASP8 (interacts with) TRIM28
279651	110.6541159	interacts with	BARD1 (interacts with) MSH2	FALSE	interacts with	BARD1 (interacts with) MSH2
214113	374.1192109	interacts with	HDAC2 (interacts with) MBD3L1	FALSE	interacts with	HDAC2 (interacts with) MBD3L1
214112	231.0687791	interacts with	HDAC2 (interacts with) MTA3	FALSE	interacts with	HDAC2 (interacts with) MTA3
263269	187.9994929	interacts with	CASP8 (interacts with) TNFAIP3	FALSE	interacts with	CASP8 (interacts with) TNFAIP3
279648	130.7702685	interacts with	BARD1 (interacts with) MYST2	FALSE	interacts with	BARD1 (interacts with) MYST2
263264	130.2640757	interacts with	CASP8 (interacts with) RIPK2	FALSE	interacts with	CASP8 (interacts with) RIPK2
263265	183.0165776	interacts with	CASP8 (interacts with) EIF2AK2	FALSE	interacts with	CASP8 (interacts with) EIF2AK2
214116	79.59368038	interacts with	HDAC2 (interacts with) TAL1	FALSE	interacts with	HDAC2 (interacts with) TAL1
279661	191.7329042	interacts with	BARD1 (interacts with) ING5	FALSE	interacts with	BARD1 (interacts with) ING5
279655	97.61481651	interacts with	BARD1 (interacts with) ZHX1	FALSE	interacts with	BARD1 (interacts with) ZHX1
214126	90.61108635	interacts with	HDAC2 (interacts with) HSF1	FALSE	interacts with	HDAC2 (interacts with) HSF1
263285	368.9181939	interacts with	CASP8 (interacts with) DNAJC7	FALSE	interacts with	CASP8 (interacts with) DNAJC7
197750	1108.313751	interacts with	FLJ10781 (interacts with) UBC	FALSE	interacts with	FLJ10781 (interacts with) UBC
263279	1663.053348	interacts with	CASP8 (interacts with) USO1	FALSE	interacts with	CASP8 (interacts with) USO1
279664	125.6026191	interacts with	BARD1 (interacts with) H2AFX	FALSE	interacts with	BARD1 (interacts with) H2AFX
279675	90.60473279	interacts with	BARD1 (interacts with) UBE1	FALSE	interacts with	BARD1 (interacts with) UBE1
214138	125.7473709	interacts with	HDAC2 (interacts with) MXD1	FALSE	interacts with	HDAC2 (interacts with) MXD1
279676	113.4523918	interacts with	BARD1 (interacts with) BRCA1	FALSE	interacts with	BARD1 (interacts with) BRCA1
197753	643.4117438	interacts with	MBC2 (interacts with) YWHAZ	FALSE	interacts with	MBC2 (interacts with) YWHAZ
197751	735.6862493	interacts with	FLJ10781 (interacts with) IKBKG	FALSE	interacts with	FLJ10781 (interacts with) IKBKG
279671	196.1239257	interacts with	BARD1 (interacts with) CSTF2	FALSE	interacts with	BARD1 (interacts with) CSTF2
279672	149.3030022	interacts with	BARD1 (interacts with) UBE2D1	FALSE	interacts with	BARD1 (interacts with) UBE2D1
214139	112.5504685	interacts with	HDAC2 (interacts with) RB1	FALSE	interacts with	HDAC2 (interacts with) RB1
263301	300.8800728	interacts with	CASP8 (interacts with) TRAF2	FALSE	interacts with	CASP8 (interacts with) TRAF2
263302	167.3466732	interacts with	CASP8 (interacts with) RALBP1	FALSE	interacts with	CASP8 (interacts with) RALBP1
214147	207.3145502	interacts with	HDAC2 (interacts with) TCF3	FALSE	interacts with	HDAC2 (interacts with) TCF3
263298	430.7658507	interacts with	CASP8 (interacts with) VIM	FALSE	interacts with	CASP8 (interacts with) VIM
263308	292.855205	interacts with	CASP8 (interacts with) PEA15	FALSE	interacts with	CASP8 (interacts with) PEA15
197774	309.6737768	interacts with	APRT (interacts with) IKBKE	FALSE	interacts with	APRT (interacts with) IKBKE
197773	980.5062382	interacts with	APRT (interacts with) IKBKG	FALSE	interacts with	APRT (interacts with) IKBKG
263305	219.680061	interacts with	CASP8 (interacts with) FASLG	FALSE	interacts with	CASP8 (interacts with) FASLG
197772	461.7549418	interacts with	APRT (interacts with) TRAF6	FALSE	interacts with	APRT (interacts with) TRAF6
197778	160.9255085	interacts with	APRT (interacts with) MLH1	FALSE	interacts with	APRT (interacts with) MLH1
263316	178.0969367	interacts with	CASP8 (interacts with) RIPK1	FALSE	interacts with	CASP8 (interacts with) RIPK1
263318	130.216329	interacts with	CASP8 (interacts with) FADD	FALSE	interacts with	CASP8 (interacts with) FADD
214165	134.0134639	interacts with	HDAC2 (interacts with) RELA	FALSE	interacts with	HDAC2 (interacts with) RELA
263313	422.0347978	interacts with	CASP8 (interacts with) NOL3	FALSE	interacts with	CASP8 (interacts with) NOL3
246932	1598.11692	interacts with	NINL (interacts with) PLK1	FALSE	interacts with	NINL (interacts with) PLK1
246931	1844	interacts with	FLJ20254 (interacts with) LSM1	FALSE	interacts with	FLJ20254 (interacts with) LSM1
214167	82.01323362	interacts with	HDAC2 (interacts with) SP1	FALSE	interacts with	HDAC2 (interacts with) SP1
214178	105.3802168	interacts with	HDAC2 (interacts with) MTA2	FALSE	interacts with	HDAC2 (interacts with) MTA2
246949	765.3536358	interacts with	NINL (interacts with) ZFC3H1	FALSE	interacts with	NINL (interacts with) ZFC3H1
214181	40.79674529	interacts with	HDAC2 (interacts with) SIN3A	FALSE	interacts with	HDAC2 (interacts with) SIN3A
214180	120.4189984	interacts with	HDAC2 (interacts with) MTA1	FALSE	interacts with	HDAC2 (interacts with) MTA1
214179	203.7098698	interacts with	HDAC2 (interacts with) MBD2	FALSE	interacts with	HDAC2 (interacts with) MBD2
279749	1299.662195	interacts with	STAM (interacts with) UBC	FALSE	interacts with	STAM (interacts with) UBC
230599	1844	interacts with	FLJ30655 (interacts with) IKBKG	FALSE	interacts with	FLJ30655 (interacts with) IKBKG
197850	915.2183898	interacts with	RPS5 (interacts with) UBC	FALSE	interacts with	RPS5 (interacts with) UBC
197855	50.81759348	interacts with	RPS5 (interacts with) TBK1	FALSE	interacts with	RPS5 (interacts with) TBK1
197862	95.65234214	interacts with	HSPA1L (interacts with) YWHAZ	FALSE	interacts with	HSPA1L (interacts with) YWHAZ
197861	316.1438572	interacts with	HSPA1L (interacts with) TP53	FALSE	interacts with	HSPA1L (interacts with) TP53
197860	452.4084237	interacts with	HSPA1L (interacts with) UBC	FALSE	interacts with	HSPA1L (interacts with) UBC
214243	1844	interacts with	DNAJC13 (interacts with) STUB1	FALSE	interacts with	DNAJC13 (interacts with) STUB1
197866	53.01094836	interacts with	HSPA1L (interacts with) NFKBIA	FALSE	interacts with	HSPA1L (interacts with) NFKBIA
197865	58.12590567	interacts with	HSPA1L (interacts with) TRAF2	FALSE	interacts with	HSPA1L (interacts with) TRAF2
197864	438.9869371	interacts with	HSPA1L (interacts with) IKBKG	FALSE	interacts with	HSPA1L (interacts with) IKBKG
263405	1001.342922	interacts with	PLCL2 (interacts with) SUMO1	FALSE	interacts with	PLCL2 (interacts with) SUMO1
197863	125.2280036	interacts with	HSPA1L (interacts with) TRAF6	FALSE	interacts with	HSPA1L (interacts with) TRAF6
263406	882.2066034	interacts with	PLCL2 (interacts with) PPP1CA	FALSE	interacts with	PLCL2 (interacts with) PPP1CA
197870	38.98998797	interacts with	HSPA1L (interacts with) TNFRSF1A	FALSE	interacts with	HSPA1L (interacts with) TNFRSF1A
197869	84.4601619	interacts with	HSPA1L (interacts with) MAP3K3	FALSE	interacts with	HSPA1L (interacts with) MAP3K3
197868	63.78457309	interacts with	HSPA1L (interacts with) IKBKB	FALSE	interacts with	HSPA1L (interacts with) IKBKB
197867	58.2804094	interacts with	HSPA1L (interacts with) NFKB1	FALSE	interacts with	HSPA1L (interacts with) NFKB1
197874	28.21402897	interacts with	HSPA1L (interacts with) RIPK1	FALSE	interacts with	HSPA1L (interacts with) RIPK1
197873	88.93403532	interacts with	HSPA1L (interacts with) RUVBL2	FALSE	interacts with	HSPA1L (interacts with) RUVBL2
197871	40.48907971	interacts with	HSPA1L (interacts with) MAP3K14	FALSE	interacts with	HSPA1L (interacts with) MAP3K14
197876	38.61858561	interacts with	HSPA1L (interacts with) TNFRSF1B	FALSE	interacts with	HSPA1L (interacts with) TNFRSF1B
197875	31.77119539	interacts with	HSPA1L (interacts with) NFKB2	FALSE	interacts with	HSPA1L (interacts with) NFKB2
197886	32.22771974	interacts with	HSPA1L (interacts with) RIPK2	FALSE	interacts with	HSPA1L (interacts with) RIPK2
197884	34.84461267	interacts with	HSPA1L (interacts with) NFKBIB	FALSE	interacts with	HSPA1L (interacts with) NFKBIB
197889	93.71897773	interacts with	HSPA1L (interacts with) TRAF3IP1	FALSE	interacts with	HSPA1L (interacts with) TRAF3IP1
197892	21.47695633	interacts with	HSPA1L (interacts with) TANK	FALSE	interacts with	HSPA1L (interacts with) TANK
197891	28.37696444	interacts with	HSPA1L (interacts with) NFKBIE	FALSE	interacts with	HSPA1L (interacts with) NFKBIE
279854	1844	interacts with	TNFRSF11B (interacts with) VTN	FALSE	interacts with	TNFRSF11B (interacts with) VTN
263485	137.4927662	interacts with	PPP1R9B (interacts with) WDR48	FALSE	interacts with	PPP1R9B (interacts with) WDR48
263481	515.9499739	interacts with	PPP1R9B (interacts with) SMAD2	FALSE	interacts with	PPP1R9B (interacts with) SMAD2
263482	401.4647222	interacts with	PPP1R9B (interacts with) PRKACA	FALSE	interacts with	PPP1R9B (interacts with) PRKACA
263491	1637.372176	interacts with	DCX (interacts with) PPP1CA	FALSE	interacts with	DCX (interacts with) PPP1CA
197954	117.7111077	interacts with	HSPA6 (interacts with) NFKB1	FALSE	interacts with	HSPA6 (interacts with) NFKB1
197953	675.0551419	interacts with	HSPA6 (interacts with) UBC	FALSE	interacts with	HSPA6 (interacts with) UBC
197952	617.8064796	interacts with	HSPA6 (interacts with) IKBKG	FALSE	interacts with	HSPA6 (interacts with) IKBKG
197957	67.50125706	interacts with	HSPA6 (interacts with) MAP3K14	FALSE	interacts with	HSPA6 (interacts with) MAP3K14
197956	66.01669031	interacts with	HSPA6 (interacts with) TNFRSF1A	FALSE	interacts with	HSPA6 (interacts with) TNFRSF1A
197955	150.5112083	interacts with	HSPA6 (interacts with) MAP3K3	FALSE	interacts with	HSPA6 (interacts with) MAP3K3
197962	46.91501314	interacts with	HSPA6 (interacts with) RIPK2	FALSE	interacts with	HSPA6 (interacts with) RIPK2
197960	61.84222734	interacts with	HSPA6 (interacts with) TNFRSF1B	FALSE	interacts with	HSPA6 (interacts with) TNFRSF1B
230728	1844	interacts with	LACRT (interacts with) VTN	FALSE	interacts with	LACRT (interacts with) VTN
197959	242.7799144	interacts with	HSPA6 (interacts with) STUB1	FALSE	interacts with	HSPA6 (interacts with) STUB1
230734	364.3477154	interacts with	PSMC3 (interacts with) TRAF6	FALSE	interacts with	PSMC3 (interacts with) TRAF6
263496	206.6278236	interacts with	DCX (interacts with) PPP1R9B	FALSE	interacts with	DCX (interacts with) PPP1R9B
197963	91.22161222	interacts with	HSPA6 (interacts with) TRAF3IP1	FALSE	interacts with	HSPA6 (interacts with) TRAF3IP1
230738	24.74329915	interacts with	PSMC3 (interacts with) p44S10	FALSE	interacts with	PSMC3 (interacts with) p44S10
230737	45.52175824	interacts with	PSMC3 (interacts with) PSMD4	FALSE	interacts with	PSMC3 (interacts with) PSMD4
230736	1095.736743	interacts with	PSMC3 (interacts with) UBC	FALSE	interacts with	PSMC3 (interacts with) UBC
197967	77.86563613	interacts with	HSPA6 (interacts with) RFWD2	FALSE	interacts with	HSPA6 (interacts with) RFWD2
230742	29.01659753	interacts with	PSMC3 (interacts with) USP14	FALSE	interacts with	PSMC3 (interacts with) USP14
230741	22.7324831	interacts with	PSMC3 (interacts with) PSMC6	FALSE	interacts with	PSMC3 (interacts with) PSMC6
230740	71.58470005	interacts with	PSMC3 (interacts with) PSMD13	FALSE	interacts with	PSMC3 (interacts with) PSMD13
230739	87.16458324	interacts with	PSMC3 (interacts with) PSMD7	FALSE	interacts with	PSMC3 (interacts with) PSMD7
230746	67.18483655	interacts with	PSMC3 (interacts with) PSMC5	FALSE	interacts with	PSMC3 (interacts with) PSMC5
230743	56.12460542	interacts with	PSMC3 (interacts with) PSMD5	FALSE	interacts with	PSMC3 (interacts with) PSMD5
230750	46.48890071	interacts with	PSMC3 (interacts with) PSMD10	FALSE	interacts with	PSMC3 (interacts with) PSMD10
230747	47.44630291	interacts with	PSMC3 (interacts with) UCHL5	FALSE	interacts with	PSMC3 (interacts with) UCHL5
230751	21.47202058	interacts with	PSMC3 (interacts with) PSMC4	FALSE	interacts with	PSMC3 (interacts with) PSMC4
247142	317.7495569	interacts with	PRKACA (interacts with) SRC	FALSE	interacts with	PRKACA (interacts with) SRC
247143	385.5036057	interacts with	PRKACA (interacts with) YWHAG	FALSE	interacts with	PRKACA (interacts with) YWHAG
247150	186.0914971	interacts with	PRKACA (interacts with) TUBB4	FALSE	interacts with	PRKACA (interacts with) TUBB4
197998	891.0341132	interacts with	CAD (interacts with) IKBKG	FALSE	interacts with	CAD (interacts with) IKBKG
197997	102.9394211	interacts with	CAD (interacts with) SMAD2	FALSE	interacts with	CAD (interacts with) SMAD2
197996	109.6433589	interacts with	CAD (interacts with) YWHAZ	FALSE	interacts with	CAD (interacts with) YWHAZ
197995	149.0629397	interacts with	CAD (interacts with) YWHAG	FALSE	interacts with	CAD (interacts with) YWHAG
247147	269.8577714	interacts with	PRKACA (interacts with) TUBB	FALSE	interacts with	PRKACA (interacts with) TUBB
247154	156.1374087	interacts with	PRKACA (interacts with) TUBG1	FALSE	interacts with	PRKACA (interacts with) TUBG1
198002	73.17635153	interacts with	CAD (interacts with) NFKB1	FALSE	interacts with	CAD (interacts with) NFKB1
247153	410.7130012	interacts with	PRKACA (interacts with) TCF3	FALSE	interacts with	PRKACA (interacts with) TCF3
198001	569.3490224	interacts with	CAD (interacts with) UBC	FALSE	interacts with	CAD (interacts with) UBC
198000	74.58225181	interacts with	CAD (interacts with) MAPK1	FALSE	interacts with	CAD (interacts with) MAPK1
247151	228.9907409	interacts with	PRKACA (interacts with) TUBA3	FALSE	interacts with	PRKACA (interacts with) TUBA3
197999	104.2158516	interacts with	CAD (interacts with) TRAF2	FALSE	interacts with	CAD (interacts with) TRAF2
198006	92.7811485	interacts with	CAD (interacts with) PPP2CA	FALSE	interacts with	CAD (interacts with) PPP2CA
198005	70.17412905	interacts with	CAD (interacts with) MAP3K3	FALSE	interacts with	CAD (interacts with) MAP3K3
198010	68.70698467	interacts with	CAD (interacts with) PPP2R2B	FALSE	interacts with	CAD (interacts with) PPP2R2B
198008	163.1251626	interacts with	CAD (interacts with) SUMO2	FALSE	interacts with	CAD (interacts with) SUMO2
247159	311.0752481	interacts with	PRKACA (interacts with) RELA	FALSE	interacts with	PRKACA (interacts with) RELA
198007	66.71899938	interacts with	CAD (interacts with) TNFRSF1A	FALSE	interacts with	CAD (interacts with) TNFRSF1A
198011	74.02897653	interacts with	CAD (interacts with) MAP3K14	FALSE	interacts with	CAD (interacts with) MAP3K14
198018	66.79471411	interacts with	CAD (interacts with) TNFRSF1B	FALSE	interacts with	CAD (interacts with) TNFRSF1B
198017	69.81451981	interacts with	CAD (interacts with) NFKB2	FALSE	interacts with	CAD (interacts with) NFKB2
247168	3909.52975	interacts with	PRKACA (interacts with) VTN	FALSE	interacts with	PRKACA (interacts with) VTN
198016	66.45711311	interacts with	CAD (interacts with) RIPK1	FALSE	interacts with	CAD (interacts with) RIPK1
198015	1002.734071	interacts with	CAD (interacts with) PPP1CA	FALSE	interacts with	CAD (interacts with) PPP1CA
214405	1785.293916	interacts with	NARS (interacts with) UBC	FALSE	interacts with	NARS (interacts with) UBC
247171	1036.338	interacts with	PRKACA (interacts with) VIM	FALSE	interacts with	PRKACA (interacts with) VIM
247178	627.7436979	interacts with	PRKACA (interacts with) RAP1B	FALSE	interacts with	PRKACA (interacts with) RAP1B
198024	168.4829763	interacts with	CAD (interacts with) PRKACA	FALSE	interacts with	CAD (interacts with) PRKACA
198023	53.69236501	interacts with	CAD (interacts with) NFKBIE	FALSE	interacts with	CAD (interacts with) NFKBIE
247194	212.2931337	interacts with	PRKACA (interacts with) RAF1	FALSE	interacts with	PRKACA (interacts with) RAF1
279960	228.1288811	interacts with	VEGFA (interacts with) VTN	FALSE	interacts with	VEGFA (interacts with) VTN
247202	269.8299485	interacts with	PRKACA (interacts with) PRKAR1A	FALSE	interacts with	PRKACA (interacts with) PRKAR1A
198054	188.5420492	interacts with	DNCH1 (interacts with) EGFR	FALSE	interacts with	DNCH1 (interacts with) EGFR
198058	765.5375019	interacts with	DNCH1 (interacts with) IKBKG	FALSE	interacts with	DNCH1 (interacts with) IKBKG
198057	275.5287483	interacts with	DNCH1 (interacts with) TRAF6	FALSE	interacts with	DNCH1 (interacts with) TRAF6
198056	164.6164002	interacts with	DNCH1 (interacts with) YWHAZ	FALSE	interacts with	DNCH1 (interacts with) YWHAZ
198055	131.8618245	interacts with	DNCH1 (interacts with) YWHAG	FALSE	interacts with	DNCH1 (interacts with) YWHAG
198060	169.1841922	interacts with	DNCH1 (interacts with) PRKACA	FALSE	interacts with	DNCH1 (interacts with) PRKACA
198059	180.0553021	interacts with	DNCH1 (interacts with) HSPCA	FALSE	interacts with	DNCH1 (interacts with) HSPCA
198066	60.49413972	interacts with	DNCH1 (interacts with) TUBB	FALSE	interacts with	DNCH1 (interacts with) TUBB
198065	105.1007226	interacts with	DNCH1 (interacts with) MAX	FALSE	interacts with	DNCH1 (interacts with) MAX
198063	60.54837364	interacts with	DNCH1 (interacts with) PLK1	FALSE	interacts with	DNCH1 (interacts with) PLK1
198076	32.22284494	interacts with	DNCH1 (interacts with) TUBA3	FALSE	interacts with	DNCH1 (interacts with) TUBA3
198075	30.45961608	interacts with	DNCH1 (interacts with) TUBB4	FALSE	interacts with	DNCH1 (interacts with) TUBB4
198083	22.55868546	interacts with	DNCH1 (interacts with) TUBG1	FALSE	interacts with	DNCH1 (interacts with) TUBG1
280011	313.7694921	interacts with	RUNX1 (interacts with) TRAF6	FALSE	interacts with	RUNX1 (interacts with) TRAF6
280012	647.2698363	interacts with	RUNX1 (interacts with) UBC	FALSE	interacts with	RUNX1 (interacts with) UBC
280013	80.67988521	interacts with	RUNX1 (interacts with) SMAD2	FALSE	interacts with	RUNX1 (interacts with) SMAD2
198088	113.3647414	interacts with	DNCH1 (interacts with) EEF1D	FALSE	interacts with	DNCH1 (interacts with) EEF1D
280014	79.63739874	interacts with	RUNX1 (interacts with) SMAD3	FALSE	interacts with	RUNX1 (interacts with) SMAD3
198091	80.52102255	interacts with	DNCH1 (interacts with) NEK2	FALSE	interacts with	DNCH1 (interacts with) NEK2
280019	164.0882297	interacts with	RUNX1 (interacts with) STUB1	FALSE	interacts with	RUNX1 (interacts with) STUB1
280021	84.31501212	interacts with	RUNX1 (interacts with) TCF3	FALSE	interacts with	RUNX1 (interacts with) TCF3
198096	106.0751257	interacts with	DNCH1 (interacts with) PCNT2	FALSE	interacts with	DNCH1 (interacts with) PCNT2
280022	89.02103366	interacts with	RUNX1 (interacts with) SMARCB1	FALSE	interacts with	RUNX1 (interacts with) SMARCB1
280015	75.24800222	interacts with	RUNX1 (interacts with) SIN3A	FALSE	interacts with	RUNX1 (interacts with) SIN3A
280016	39.01410252	interacts with	RUNX1 (interacts with) SMAD1	FALSE	interacts with	RUNX1 (interacts with) SMAD1
280018	82.72458539	interacts with	RUNX1 (interacts with) VDR	FALSE	interacts with	RUNX1 (interacts with) VDR
280024	41.65249251	interacts with	RUNX1 (interacts with) TAL1	FALSE	interacts with	RUNX1 (interacts with) TAL1
280025	69.22321353	interacts with	RUNX1 (interacts with) SMAD5	FALSE	interacts with	RUNX1 (interacts with) SMAD5
198121	1108.313751	interacts with	TTYH2 (interacts with) UBC	FALSE	interacts with	TTYH2 (interacts with) UBC
230894	1420.949328	interacts with	CANX (interacts with) UBC	FALSE	interacts with	CANX (interacts with) UBC
230897	152.1707875	interacts with	CANX (interacts with) SMURF2	FALSE	interacts with	CANX (interacts with) SMURF2
230896	152.5897847	interacts with	CANX (interacts with) TNFRSF1A	FALSE	interacts with	CANX (interacts with) TNFRSF1A
230895	1236.068675	interacts with	CANX (interacts with) IKBKG	FALSE	interacts with	CANX (interacts with) IKBKG
230913	1078.157616	interacts with	CANX (interacts with) F8	FALSE	interacts with	CANX (interacts with) F8
230919	82.30466371	interacts with	CANX (interacts with) FSHR	FALSE	interacts with	CANX (interacts with) FSHR
230954	118.4230529	interacts with	CANX (interacts with) CFTR	FALSE	interacts with	CANX (interacts with) CFTR
214574	36.42668205	interacts with	RNF5 (interacts with) UBE2D1	FALSE	interacts with	RNF5 (interacts with) UBE2D1
214573	205.5513913	interacts with	RNF5 (interacts with) TGFBR1	FALSE	interacts with	RNF5 (interacts with) TGFBR1
214578	68.27949916	interacts with	RNF5 (interacts with) UBE2V1	FALSE	interacts with	RNF5 (interacts with) UBE2V1
214577	83.86889981	interacts with	RNF5 (interacts with) UBE2E2	FALSE	interacts with	RNF5 (interacts with) UBE2E2
214576	1133.389803	interacts with	RNF5 (interacts with) UBC	FALSE	interacts with	RNF5 (interacts with) UBC
214581	157.1482323	interacts with	RNF5 (interacts with) RPS27A	FALSE	interacts with	RNF5 (interacts with) RPS27A
214580	183.527417	interacts with	RNF5 (interacts with) UBB	FALSE	interacts with	RNF5 (interacts with) UBB
214579	101.967831	interacts with	RNF5 (interacts with) UBE2D3	FALSE	interacts with	RNF5 (interacts with) UBE2D3
214586	207.3577027	interacts with	NR3C1 (interacts with) SRC	FALSE	interacts with	NR3C1 (interacts with) SRC
214585	32.7063809	interacts with	RNF5 (interacts with) UBE2D2	FALSE	interacts with	RNF5 (interacts with) UBE2D2
214584	55.83315051	interacts with	RNF5 (interacts with) UBE2E3	FALSE	interacts with	RNF5 (interacts with) UBE2E3
214583	116.5941141	interacts with	RNF5 (interacts with) UBA52	FALSE	interacts with	RNF5 (interacts with) UBA52
263742	159.4359751	interacts with	RIPK2 (interacts with) TRAF6	FALSE	interacts with	RIPK2 (interacts with) TRAF6
214589	119.9417069	interacts with	NR3C1 (interacts with) RAF1	FALSE	interacts with	NR3C1 (interacts with) RAF1
214588	326.0176996	interacts with	NR3C1 (interacts with) PRKACA	FALSE	interacts with	NR3C1 (interacts with) PRKACA
214587	192.1831596	interacts with	NR3C1 (interacts with) UBE2I	FALSE	interacts with	NR3C1 (interacts with) UBE2I
214594	142.8761298	interacts with	NR3C1 (interacts with) PRKDC	FALSE	interacts with	NR3C1 (interacts with) PRKDC
263747	46.57727064	interacts with	RIPK2 (interacts with) TNFRSF1A	FALSE	interacts with	RIPK2 (interacts with) TNFRSF1A
263748	408.4363568	interacts with	RIPK2 (interacts with) VIM	FALSE	interacts with	RIPK2 (interacts with) VIM
214592	853.4895498	interacts with	NR3C1 (interacts with) UBC	FALSE	interacts with	NR3C1 (interacts with) UBC
263749	95.47049537	interacts with	RIPK2 (interacts with) SMURF1	FALSE	interacts with	RIPK2 (interacts with) SMURF1
263750	55.92726929	interacts with	RIPK2 (interacts with) TUBB	FALSE	interacts with	RIPK2 (interacts with) TUBB
263743	537.6477968	interacts with	RIPK2 (interacts with) UBC	FALSE	interacts with	RIPK2 (interacts with) UBC
214598	467.8118358	interacts with	NR3C1 (interacts with) STUB1	FALSE	interacts with	NR3C1 (interacts with) STUB1
263744	75.1299167	interacts with	RIPK2 (interacts with) TRAF2	FALSE	interacts with	RIPK2 (interacts with) TRAF2
214596	314.0470201	interacts with	NR3C1 (interacts with) TP53	FALSE	interacts with	NR3C1 (interacts with) TP53
263745	119.430992	interacts with	RIPK2 (interacts with) SMAD4	FALSE	interacts with	RIPK2 (interacts with) SMAD4
263746	227.2921885	interacts with	RIPK2 (interacts with) UBE2I	FALSE	interacts with	RIPK2 (interacts with) UBE2I
214601	250.012877	interacts with	NR3C1 (interacts with) UBB	FALSE	interacts with	NR3C1 (interacts with) UBB
214600	430.0215178	interacts with	NR3C1 (interacts with) RIF1	FALSE	interacts with	NR3C1 (interacts with) RIF1
263758	50.00333936	interacts with	RIPK2 (interacts with) TUBA2	FALSE	interacts with	RIPK2 (interacts with) TUBA2
263751	43.12377841	interacts with	RIPK2 (interacts with) TUBB4	FALSE	interacts with	RIPK2 (interacts with) TUBB4
214606	155.5998454	interacts with	NR3C1 (interacts with) SMARCB1	FALSE	interacts with	NR3C1 (interacts with) SMARCB1
214605	113.8838107	interacts with	NR3C1 (interacts with) TRIM28	FALSE	interacts with	NR3C1 (interacts with) TRIM28
230994	578.4167765	interacts with	PSMC5 (interacts with) TP53	FALSE	interacts with	PSMC5 (interacts with) TP53
230993	706.5399414	interacts with	PSMC5 (interacts with) UBC	FALSE	interacts with	PSMC5 (interacts with) UBC
280149	345.5937044	interacts with	TGFB1 (interacts with) VTN	FALSE	interacts with	TGFB1 (interacts with) VTN
214607	134.3650123	interacts with	NR3C1 (interacts with) SMAD3	FALSE	interacts with	NR3C1 (interacts with) SMAD3
230998	63.71939929	interacts with	PSMC5 (interacts with) PSMD4	FALSE	interacts with	PSMC5 (interacts with) PSMD4
263760	55.29263303	interacts with	RIPK2 (interacts with) RPS14	FALSE	interacts with	RIPK2 (interacts with) RPS14
214613	1219.111828	interacts with	NR3C1 (interacts with) RXRB	FALSE	interacts with	NR3C1 (interacts with) RXRB
214612	227.7856929	interacts with	NR3C1 (interacts with) SUMO4	FALSE	interacts with	NR3C1 (interacts with) SUMO4
230996	515.201667	interacts with	PSMC5 (interacts with) VIM	FALSE	interacts with	PSMC5 (interacts with) VIM
214611	171.6291676	interacts with	NR3C1 (interacts with) SET	FALSE	interacts with	NR3C1 (interacts with) SET
280155	6.20119389	interacts with	TGFB1 (interacts with) TGFB2	FALSE	interacts with	TGFB1 (interacts with) TGFB2
214618	285.4024119	interacts with	NR3C1 (interacts with) ZHX1	FALSE	interacts with	NR3C1 (interacts with) ZHX1
231002	74.7472647	interacts with	PSMC5 (interacts with) PSMD11	FALSE	interacts with	PSMC5 (interacts with) PSMD11
280156	441.1660336	interacts with	TGFB1 (interacts with) TGFBR2	FALSE	interacts with	TGFB1 (interacts with) TGFBR2
214617	192.5577382	interacts with	NR3C1 (interacts with) PIAS2	FALSE	interacts with	NR3C1 (interacts with) PIAS2
231001	62.24918428	interacts with	PSMC5 (interacts with) p44S10	FALSE	interacts with	PSMC5 (interacts with) p44S10
214616	213.3685427	interacts with	NR3C1 (interacts with) SYT1	FALSE	interacts with	NR3C1 (interacts with) SYT1
231000	255.3528411	interacts with	PSMC5 (interacts with) TRAF6	FALSE	interacts with	PSMC5 (interacts with) TRAF6
214622	109.3556622	interacts with	NR3C1 (interacts with) STAT3	FALSE	interacts with	NR3C1 (interacts with) STAT3
231006	202.2804726	interacts with	PSMC5 (interacts with) SP1	FALSE	interacts with	PSMC5 (interacts with) SP1
231004	70.24146504	interacts with	PSMC5 (interacts with) PSMD13	FALSE	interacts with	PSMC5 (interacts with) PSMD13
280153	1124.871647	interacts with	TGFB1 (interacts with) TGFBR1	FALSE	interacts with	TGFB1 (interacts with) TGFBR1
214619	706.5697535	interacts with	NR3C1 (interacts with) RAD9A	FALSE	interacts with	NR3C1 (interacts with) RAD9A
231003	45.36169867	interacts with	PSMC5 (interacts with) PSMD2	FALSE	interacts with	PSMC5 (interacts with) PSMD2
231010	66.00823087	interacts with	PSMC5 (interacts with) USP14	FALSE	interacts with	PSMC5 (interacts with) USP14
214623	142.0796903	interacts with	NR3C1 (interacts with) SUMO1	FALSE	interacts with	NR3C1 (interacts with) SUMO1
231012	256.6660597	interacts with	PSMC5 (interacts with) PSMD5	FALSE	interacts with	PSMC5 (interacts with) PSMD5
231011	71.06966315	interacts with	PSMC5 (interacts with) PSMD3	FALSE	interacts with	PSMC5 (interacts with) PSMD3
231016	220.3892859	interacts with	PSMC5 (interacts with) VDR	FALSE	interacts with	PSMC5 (interacts with) VDR
231022	27.28036959	interacts with	PSMC5 (interacts with) PSMD10	FALSE	interacts with	PSMC5 (interacts with) PSMD10
198254	62.88947726	interacts with	RPS27L (interacts with) TNFRSF1B	FALSE	interacts with	RPS27L (interacts with) TNFRSF1B
247405	357.9548928	interacts with	USP7 (interacts with) YLPM1	FALSE	interacts with	USP7 (interacts with) YLPM1
198253	718.4220554	interacts with	RPS27L (interacts with) UBC	FALSE	interacts with	RPS27L (interacts with) UBC
231020	72.90142692	interacts with	PSMC5 (interacts with) UCHL5	FALSE	interacts with	PSMC5 (interacts with) UCHL5
231026	67.11962252	interacts with	PSMC5 (interacts with) PSMC6	FALSE	interacts with	PSMC5 (interacts with) PSMC6
231024	52.86874158	interacts with	PSMC5 (interacts with) PSMD1	FALSE	interacts with	PSMC5 (interacts with) PSMD1
231023	99.21604411	interacts with	PSMC5 (interacts with) PSMD7	FALSE	interacts with	PSMC5 (interacts with) PSMD7
214643	368.1223323	interacts with	NR3C1 (interacts with) ZBTB3	FALSE	interacts with	NR3C1 (interacts with) ZBTB3
214650	116.6860344	interacts with	NR3C1 (interacts with) RELA	FALSE	interacts with	NR3C1 (interacts with) RELA
231054	386.7664758	interacts with	STAU1 (interacts with) TUBB	FALSE	interacts with	STAU1 (interacts with) TUBB
231055	290.7848912	interacts with	STAU1 (interacts with) TUBB4	FALSE	interacts with	STAU1 (interacts with) TUBB4
214671	159.4888339	interacts with	NR3C1 (interacts with) SMARCA2	FALSE	interacts with	NR3C1 (interacts with) SMARCA2
231060	265.552935	interacts with	POLR2E (interacts with) RUVBL2	FALSE	interacts with	POLR2E (interacts with) RUVBL2
231064	103.5146072	interacts with	POLR2E (interacts with) TRIM29	FALSE	interacts with	POLR2E (interacts with) TRIM29
280251	158.5209701	interacts with	MCL1 (interacts with) UBB	FALSE	interacts with	MCL1 (interacts with) UBB
280252	146.3473822	interacts with	MCL1 (interacts with) RPS27A	FALSE	interacts with	MCL1 (interacts with) RPS27A
280253	104.1674062	interacts with	MCL1 (interacts with) UBA52	FALSE	interacts with	MCL1 (interacts with) UBA52
280249	130.5521138	interacts with	MCL1 (interacts with) PCNA	FALSE	interacts with	MCL1 (interacts with) PCNA
280256	935.0597613	interacts with	MCL1 (interacts with) UBC	FALSE	interacts with	MCL1 (interacts with) UBC
280257	104.9762369	interacts with	MCL1 (interacts with) TPT1	FALSE	interacts with	MCL1 (interacts with) TPT1
247510	180.1978792	interacts with	ATXN3 (interacts with) NCOR1	FALSE	interacts with	ATXN3 (interacts with) NCOR1
280283	139.8125954	interacts with	MAP3K7 (interacts with) RELA	FALSE	interacts with	MAP3K7 (interacts with) RELA
280284	134.4435496	interacts with	MAP3K7 (interacts with) TGFBR1	FALSE	interacts with	MAP3K7 (interacts with) TGFBR1
280285	100.0136188	interacts with	MAP3K7 (interacts with) MAPK14	FALSE	interacts with	MAP3K7 (interacts with) MAPK14
280286	79.44702928	interacts with	MAP3K7 (interacts with) SMURF1	FALSE	interacts with	MAP3K7 (interacts with) SMURF1
247518	274.9515341	interacts with	ATXN3 (interacts with) CREBBP	FALSE	interacts with	ATXN3 (interacts with) CREBBP
280280	520.2861465	interacts with	MAP3K7 (interacts with) UBC	FALSE	interacts with	MAP3K7 (interacts with) UBC
280281	154.5024323	interacts with	MAP3K7 (interacts with) SMAD3	FALSE	interacts with	MAP3K7 (interacts with) SMAD3
280282	70.99793349	interacts with	MAP3K7 (interacts with) TRAF2	FALSE	interacts with	MAP3K7 (interacts with) TRAF2
247515	218.4755981	interacts with	ATXN3 (interacts with) UBB	FALSE	interacts with	ATXN3 (interacts with) UBB
280291	191.1703115	interacts with	MAP3K7 (interacts with) XIAP	FALSE	interacts with	MAP3K7 (interacts with) XIAP
280293	120.286256	interacts with	MAP3K7 (interacts with) STAT3	FALSE	interacts with	MAP3K7 (interacts with) STAT3
247519	140.4801143	interacts with	ATXN3 (interacts with) PSMD7	FALSE	interacts with	ATXN3 (interacts with) PSMD7
280289	46.69265183	interacts with	MAP3K7 (interacts with) TNF	FALSE	interacts with	MAP3K7 (interacts with) TNF
247524	963.0261081	interacts with	ATXN3 (interacts with) UBC	FALSE	interacts with	ATXN3 (interacts with) UBC
280300	42.95539588	interacts with	MAP3K7 (interacts with) RIPK1	FALSE	interacts with	MAP3K7 (interacts with) RIPK1
280301	84.52137507	interacts with	MAP3K7 (interacts with) TRAF3IP2	FALSE	interacts with	MAP3K7 (interacts with) TRAF3IP2
280296	105.1384936	interacts with	MAP3K7 (interacts with) PPM1B	FALSE	interacts with	MAP3K7 (interacts with) PPM1B
247533	100.5860188	interacts with	ATXN3 (interacts with) VCP	FALSE	interacts with	ATXN3 (interacts with) VCP
280308	153.1626099	interacts with	MAP3K7 (interacts with) TRAF6	FALSE	interacts with	MAP3K7 (interacts with) TRAF6
280315	55.11904136	interacts with	MAP3K7 (interacts with) TAB3	FALSE	interacts with	MAP3K7 (interacts with) TAB3
231166	115.2024475	interacts with	SMURF2 (interacts with) TNFRSF1B	FALSE	interacts with	SMURF2 (interacts with) TNFRSF1B
231165	92.57352433	interacts with	SMURF2 (interacts with) SQSTM1	FALSE	interacts with	SMURF2 (interacts with) SQSTM1
231164	225.4507297	interacts with	SMURF2 (interacts with) TRAF2	FALSE	interacts with	SMURF2 (interacts with) TRAF2
231168	110.9216345	interacts with	SMURF2 (interacts with) TGFBR2	FALSE	interacts with	SMURF2 (interacts with) TGFBR2
231167	929.3413342	interacts with	SMURF2 (interacts with) UBC	FALSE	interacts with	SMURF2 (interacts with) UBC
231171	177.6322843	interacts with	SMURF2 (interacts with) TGFBR1	FALSE	interacts with	SMURF2 (interacts with) TGFBR1
231179	259.2129922	interacts with	SMURF2 (interacts with) UXT	FALSE	interacts with	SMURF2 (interacts with) UXT
198469	242.1280392	interacts with	MBD3L1 (interacts with) SIN3A	FALSE	interacts with	MBD3L1 (interacts with) SIN3A
214851	1844	interacts with	LAP1B (interacts with) PPP1CA	FALSE	interacts with	LAP1B (interacts with) PPP1CA
198474	64.99638558	interacts with	MBD3L1 (interacts with) MTA1	FALSE	interacts with	MBD3L1 (interacts with) MTA1
198472	54.25650958	interacts with	MBD3L1 (interacts with) MTA2	FALSE	interacts with	MBD3L1 (interacts with) MTA2
231245	188.7677337	interacts with	NRBF2 (interacts with) PA2G4	FALSE	interacts with	NRBF2 (interacts with) PA2G4
280412	140.5257382	interacts with	MBD2 (interacts with) SIN3A	FALSE	interacts with	MBD2 (interacts with) SIN3A
280419	13.69075742	interacts with	MBD2 (interacts with) MBD3L1	FALSE	interacts with	MBD2 (interacts with) MBD3L1
264043	84.96180596	interacts with	HTT (interacts with) SIN3A	FALSE	interacts with	HTT (interacts with) SIN3A
264044	144.6739579	interacts with	HTT (interacts with) SUMO1	FALSE	interacts with	HTT (interacts with) SUMO1
264045	121.69128	interacts with	HTT (interacts with) NCOR1	FALSE	interacts with	HTT (interacts with) NCOR1
264040	1132.827232	interacts with	FRMD4A (interacts with) HNRPA1	FALSE	interacts with	FRMD4A (interacts with) HNRPA1
280424	33.56170865	interacts with	MBD2 (interacts with) MTA2	FALSE	interacts with	MBD2 (interacts with) MTA2
264041	717.3930505	interacts with	FRMD4A (interacts with) TRAF3IP1	FALSE	interacts with	FRMD4A (interacts with) TRAF3IP1
264042	419.7093994	interacts with	HTT (interacts with) TP53	FALSE	interacts with	HTT (interacts with) TP53
264053	59.41893978	interacts with	HTT (interacts with) PIAS4	FALSE	interacts with	HTT (interacts with) PIAS4
264054	68.85408211	interacts with	HTT (interacts with) TCERG1	FALSE	interacts with	HTT (interacts with) TCERG1
264048	272.4158049	interacts with	HTT (interacts with) TUBB	FALSE	interacts with	HTT (interacts with) TUBB
198522	268.7560669	interacts with	ARS2 (interacts with) SF3A2	FALSE	interacts with	ARS2 (interacts with) SF3A2
231289	140.7843849	interacts with	GPS2 (interacts with) SIN3A	FALSE	interacts with	GPS2 (interacts with) SIN3A
198521	814.3094082	interacts with	ARS2 (interacts with) VIM	FALSE	interacts with	ARS2 (interacts with) VIM
231288	356.2649815	interacts with	GPS2 (interacts with) HDAC1	FALSE	interacts with	GPS2 (interacts with) HDAC1
231287	789.6484304	interacts with	GPS2 (interacts with) TP53	FALSE	interacts with	GPS2 (interacts with) TP53
198519	283.3319052	interacts with	ARS2 (interacts with) SUMO2	FALSE	interacts with	ARS2 (interacts with) SUMO2
264055	81.01608604	interacts with	HTT (interacts with) PRPF40A	FALSE	interacts with	HTT (interacts with) PRPF40A
198526	97.5434505	interacts with	ARS2 (interacts with) GIT1	FALSE	interacts with	ARS2 (interacts with) GIT1
198524	451.1745657	interacts with	ARS2 (interacts with) CHD3	FALSE	interacts with	ARS2 (interacts with) CHD3
198530	62.71396107	interacts with	ARS2 (interacts with) IMMT	FALSE	interacts with	ARS2 (interacts with) IMMT
264063	120.4985564	interacts with	HTT (interacts with) SP1	FALSE	interacts with	HTT (interacts with) SP1
231301	216.3591422	interacts with	GPS2 (interacts with) NCOR1	FALSE	interacts with	GPS2 (interacts with) NCOR1
231300	399.5751379	interacts with	GPS2 (interacts with) MGC11271	FALSE	interacts with	GPS2 (interacts with) MGC11271
264093	198.9353808	interacts with	ORC1L (interacts with) RPS27A	FALSE	interacts with	ORC1L (interacts with) RPS27A
280478	206.5677236	interacts with	ILK (interacts with) ITGB3	FALSE	interacts with	ILK (interacts with) ITGB3
264090	944.3105917	interacts with	ORC1L (interacts with) UBC	FALSE	interacts with	ORC1L (interacts with) UBC
264095	98.43018368	interacts with	ORC1L (interacts with) XPO1	FALSE	interacts with	ORC1L (interacts with) XPO1
264096	134.5619105	interacts with	ORC1L (interacts with) UBA52	FALSE	interacts with	ORC1L (interacts with) UBA52
280481	193.6689199	interacts with	ILK (interacts with) SIAHBP1	FALSE	interacts with	ILK (interacts with) SIAHBP1
264097	128.2523692	interacts with	ORC1L (interacts with) RPA2	FALSE	interacts with	ORC1L (interacts with) RPA2
280482	129.4940691	interacts with	ILK (interacts with) ITGA5	FALSE	interacts with	ILK (interacts with) ITGA5
264098	105.8013276	interacts with	ORC1L (interacts with) TERF2	FALSE	interacts with	ORC1L (interacts with) TERF2
280490	146.3926484	interacts with	ILK (interacts with) MARS	FALSE	interacts with	ILK (interacts with) MARS
214962	281.3927432	interacts with	PTEN (interacts with) TP53	FALSE	interacts with	PTEN (interacts with) TP53
264115	207.5513377	interacts with	CDK1 (interacts with) PCNA	FALSE	interacts with	CDK1 (interacts with) PCNA
280500	120.5770379	interacts with	ILK (interacts with) MYO1D	FALSE	interacts with	ILK (interacts with) MYO1D
264118	177.9983502	interacts with	CDK1 (interacts with) CDKN1A	FALSE	interacts with	CDK1 (interacts with) CDKN1A
264111	493.2519672	interacts with	CDK1 (interacts with) TP53	FALSE	interacts with	CDK1 (interacts with) TP53
280496	136.7071593	interacts with	ILK (interacts with) XPO7	FALSE	interacts with	ILK (interacts with) XPO7
264112	235.085966	interacts with	CDK1 (interacts with) FYN	FALSE	interacts with	CDK1 (interacts with) FYN
214964	154.6777569	interacts with	PTEN (interacts with) UBE2I	FALSE	interacts with	PTEN (interacts with) UBE2I
264113	139.0973894	interacts with	CDK1 (interacts with) RB1	FALSE	interacts with	CDK1 (interacts with) RB1
214963	856.5680694	interacts with	PTEN (interacts with) UBC	FALSE	interacts with	PTEN (interacts with) UBC
264114	251.9183766	interacts with	CDK1 (interacts with) MYC	FALSE	interacts with	CDK1 (interacts with) MYC
264126	136.3457997	interacts with	CDK1 (interacts with) TP73	FALSE	interacts with	CDK1 (interacts with) TP73
264121	116.4476671	interacts with	CDK1 (interacts with) MAPT	FALSE	interacts with	CDK1 (interacts with) MAPT
264128	118.0023276	interacts with	CDK1 (interacts with) KHDRBS1	FALSE	interacts with	CDK1 (interacts with) KHDRBS1
264130	126.383826	interacts with	CDK1 (interacts with) KAT5	FALSE	interacts with	CDK1 (interacts with) KAT5
264139	100.0497746	interacts with	CDK1 (interacts with) RUNX2	FALSE	interacts with	CDK1 (interacts with) RUNX2
264141	144.9104029	interacts with	CDK1 (interacts with) GADD45G	FALSE	interacts with	CDK1 (interacts with) GADD45G
264136	192.9407261	interacts with	CDK1 (interacts with) TGFBR2	FALSE	interacts with	CDK1 (interacts with) TGFBR2
264150	128.5358967	interacts with	CDK1 (interacts with) UBE2A	FALSE	interacts with	CDK1 (interacts with) UBE2A
264143	262.1426171	interacts with	CDK1 (interacts with) FEN1	FALSE	interacts with	CDK1 (interacts with) FEN1
264145	278.1943849	interacts with	CDK1 (interacts with) CSNK2A1	FALSE	interacts with	CDK1 (interacts with) CSNK2A1
264156	557.2579037	interacts with	CDK1 (interacts with) VIM	FALSE	interacts with	CDK1 (interacts with) VIM
247773	612.4081691	interacts with	FBXO2 (interacts with) VCP	FALSE	interacts with	FBXO2 (interacts with) VCP
247772	1272.988243	interacts with	FBXO2 (interacts with) STUB1	FALSE	interacts with	FBXO2 (interacts with) STUB1
264154	239.3974655	interacts with	CDK1 (interacts with) CNOT7	FALSE	interacts with	CDK1 (interacts with) CNOT7
247775	246.7368488	interacts with	FBXO2 (interacts with) SKP1	FALSE	interacts with	FBXO2 (interacts with) SKP1
231406	225.4540312	interacts with	HIST1H3A (interacts with) PRKCA	FALSE	interacts with	HIST1H3A (interacts with) PRKCA
264169	138.9550696	interacts with	CDK1 (interacts with) FOXM1	FALSE	interacts with	CDK1 (interacts with) FOXM1
264179	153.7404626	interacts with	CDK1 (interacts with) RPA2	FALSE	interacts with	CDK1 (interacts with) RPA2
231410	86.04391789	interacts with	HIST1H3A (interacts with) HTATIP	FALSE	interacts with	HIST1H3A (interacts with) HTATIP
247792	488.051131	interacts with	SIP1 (interacts with) SMN1	FALSE	interacts with	SIP1 (interacts with) SMN1
231407	118.208531	interacts with	HIST1H3A (interacts with) NCOR1	FALSE	interacts with	HIST1H3A (interacts with) NCOR1
231413	43.9312796	interacts with	HIST1H3A (interacts with) SMARCA2	FALSE	interacts with	HIST1H3A (interacts with) SMARCA2
231418	110.7436643	interacts with	HIST1H3A (interacts with) MEN1	FALSE	interacts with	HIST1H3A (interacts with) MEN1
231415	52.48045938	interacts with	HIST1H3A (interacts with) MTA2	FALSE	interacts with	HIST1H3A (interacts with) MTA2
198654	630.0743656	interacts with	ACTR1B (interacts with) CHD3	FALSE	interacts with	ACTR1B (interacts with) CHD3
264183	197.448624	interacts with	CDK1 (interacts with) EEF1D	FALSE	interacts with	CDK1 (interacts with) EEF1D
231419	103.5516344	interacts with	HIST1H3A (interacts with) MYST2	FALSE	interacts with	HIST1H3A (interacts with) MYST2
264197	478.3401656	interacts with	CDK1 (interacts with) GOLGA2	FALSE	interacts with	CDK1 (interacts with) GOLGA2
215046	631.6834584	interacts with	EPPK1 (interacts with) IKBKG	FALSE	interacts with	EPPK1 (interacts with) IKBKG
215045	288.022696	interacts with	EPPK1 (interacts with) TRAF6	FALSE	interacts with	EPPK1 (interacts with) TRAF6
215050	86.31592963	interacts with	EPPK1 (interacts with) SQSTM1	FALSE	interacts with	EPPK1 (interacts with) SQSTM1
215049	106.7606511	interacts with	EPPK1 (interacts with) TNFRSF1A	FALSE	interacts with	EPPK1 (interacts with) TNFRSF1A
215048	239.2995757	interacts with	EPPK1 (interacts with) MAP3K3	FALSE	interacts with	EPPK1 (interacts with) MAP3K3
215047	243.3223439	interacts with	EPPK1 (interacts with) MYC	FALSE	interacts with	EPPK1 (interacts with) MYC
264200	144.8027381	interacts with	CDK1 (interacts with) LYN	FALSE	interacts with	CDK1 (interacts with) LYN
215051	88.42137727	interacts with	EPPK1 (interacts with) TNFRSF1B	FALSE	interacts with	EPPK1 (interacts with) TNFRSF1B
198678	169.3157328	interacts with	MRCL3 (interacts with) NFKB1	FALSE	interacts with	MRCL3 (interacts with) NFKB1
231446	159.1529567	interacts with	HIST1H3A (interacts with) PRKCB1	FALSE	interacts with	HIST1H3A (interacts with) PRKCB1
198676	279.6713152	interacts with	MRCL3 (interacts with) TRAF6	FALSE	interacts with	MRCL3 (interacts with) TRAF6
198680	104.8097861	interacts with	MRCL3 (interacts with) TNFRSF1A	FALSE	interacts with	MRCL3 (interacts with) TNFRSF1A
280611	1617.022983	interacts with	CARD10 (interacts with) IKBKG	FALSE	interacts with	CARD10 (interacts with) IKBKG
215074	1112.939497	interacts with	CHD3 (interacts with) SP1	FALSE	interacts with	CHD3 (interacts with) SP1
280612	644.7342773	interacts with	BCL10 (interacts with) UBC	FALSE	interacts with	BCL10 (interacts with) UBC
215073	1438.796739	interacts with	CHD3 (interacts with) JUN	FALSE	interacts with	CHD3 (interacts with) JUN
280613	90.52323507	interacts with	BCL10 (interacts with) TRAF2	FALSE	interacts with	BCL10 (interacts with) TRAF2
280614	109.2819987	interacts with	BCL10 (interacts with) NFKBIA	FALSE	interacts with	BCL10 (interacts with) NFKBIA
215078	2721.916858	interacts with	CHD3 (interacts with) CSNK2A1	FALSE	interacts with	CHD3 (interacts with) CSNK2A1
215077	626.0765653	interacts with	CHD3 (interacts with) SIN3A	FALSE	interacts with	CHD3 (interacts with) SIN3A
215076	4266.336418	interacts with	CHD3 (interacts with) TP53	FALSE	interacts with	CHD3 (interacts with) TP53
215075	1075.296458	interacts with	CHD3 (interacts with) UBE2I	FALSE	interacts with	CHD3 (interacts with) UBE2I
280619	56.24453951	interacts with	BCL10 (interacts with) BIRC4	FALSE	interacts with	BCL10 (interacts with) BIRC4
215082	907.6707194	interacts with	CHD3 (interacts with) RIF1	FALSE	interacts with	CHD3 (interacts with) RIF1
280620	184.7556192	interacts with	BCL10 (interacts with) RPS27A	FALSE	interacts with	BCL10 (interacts with) RPS27A
215081	1561.276581	interacts with	CHD3 (interacts with) CREB1	FALSE	interacts with	CHD3 (interacts with) CREB1
280621	56.59667741	interacts with	BCL10 (interacts with) UBE2N	FALSE	interacts with	BCL10 (interacts with) UBE2N
215080	398.5292039	interacts with	CHD3 (interacts with) RAD51	FALSE	interacts with	CHD3 (interacts with) RAD51
280622	122.6864087	interacts with	BCL10 (interacts with) UBA52	FALSE	interacts with	BCL10 (interacts with) UBA52
231463	199.7610031	interacts with	HIST1H3A (interacts with) SET	FALSE	interacts with	HIST1H3A (interacts with) SET
215079	1340.496504	interacts with	CHD3 (interacts with) VIM	FALSE	interacts with	CHD3 (interacts with) VIM
280615	99.2838445	interacts with	BCL10 (interacts with) CHUK	FALSE	interacts with	BCL10 (interacts with) CHUK
215086	1434.708519	interacts with	CHD3 (interacts with) TRIM28	FALSE	interacts with	CHD3 (interacts with) TRIM28
215085	1026.342411	interacts with	CHD3 (interacts with) SKIL	FALSE	interacts with	CHD3 (interacts with) SKIL
280616	62.5267054	interacts with	BCL10 (interacts with) TNFRSF1A	FALSE	interacts with	BCL10 (interacts with) TNFRSF1A
280617	38.07303484	interacts with	BCL10 (interacts with) MAP3K7	FALSE	interacts with	BCL10 (interacts with) MAP3K7
215084	888.9476	interacts with	CHD3 (interacts with) TP73	FALSE	interacts with	CHD3 (interacts with) TP73
280618	86.87077092	interacts with	BCL10 (interacts with) UBB	FALSE	interacts with	BCL10 (interacts with) UBB
215083	1101.778582	interacts with	CHD3 (interacts with) KPNB1	FALSE	interacts with	CHD3 (interacts with) KPNB1
215090	358.5945791	interacts with	CHD3 (interacts with) GIT1	FALSE	interacts with	CHD3 (interacts with) GIT1
215089	538.417263	interacts with	CHD3 (interacts with) FNBP3	FALSE	interacts with	CHD3 (interacts with) FNBP3
215088	492.5954827	interacts with	CHD3 (interacts with) HD	FALSE	interacts with	CHD3 (interacts with) HD
231472	129.3001992	interacts with	HIST1H3A (interacts with) WDR5	FALSE	interacts with	HIST1H3A (interacts with) WDR5
215087	477.6433574	interacts with	CHD3 (interacts with) SMARCA2	FALSE	interacts with	CHD3 (interacts with) SMARCA2
280623	48.21485056	interacts with	BCL10 (interacts with) IRAK1	FALSE	interacts with	BCL10 (interacts with) IRAK1
215094	554.4529166	interacts with	CHD3 (interacts with) TNFRSF14	FALSE	interacts with	CHD3 (interacts with) TNFRSF14
215093	270.8103375	interacts with	CHD3 (interacts with) PIAS4	FALSE	interacts with	CHD3 (interacts with) PIAS4
215092	1046.803606	interacts with	CHD3 (interacts with) KPNA2	FALSE	interacts with	CHD3 (interacts with) KPNA2
280626	43.99785957	interacts with	BCL10 (interacts with) RIPK2	FALSE	interacts with	BCL10 (interacts with) RIPK2
215091	729.6041228	interacts with	CHD3 (interacts with) MYB	FALSE	interacts with	CHD3 (interacts with) MYB
215098	469.2266901	interacts with	CHD3 (interacts with) PRPF40A	FALSE	interacts with	CHD3 (interacts with) PRPF40A
215097	731.8021438	interacts with	CHD3 (interacts with) PCNT2	FALSE	interacts with	CHD3 (interacts with) PCNT2
215096	349.0877333	interacts with	CHD3 (interacts with) HTT	FALSE	interacts with	CHD3 (interacts with) HTT
215095	543.8369802	interacts with	CHD3 (interacts with) TCERG1	FALSE	interacts with	CHD3 (interacts with) TCERG1
280631	66.62017032	interacts with	BCL10 (interacts with) PRKCQ	FALSE	interacts with	BCL10 (interacts with) PRKCQ
215102	418.9643885	interacts with	CHD3 (interacts with) TAF6	FALSE	interacts with	CHD3 (interacts with) TAF6
215101	462.444642	interacts with	CHD3 (interacts with) SAT	FALSE	interacts with	CHD3 (interacts with) SAT
215100	683.8816158	interacts with	CHD3 (interacts with) DDX5	FALSE	interacts with	CHD3 (interacts with) DDX5
215099	695.3022423	interacts with	CHD3 (interacts with) HSF1	FALSE	interacts with	CHD3 (interacts with) HSF1
280643	29.27542755	interacts with	BCL10 (interacts with) BIRC2	FALSE	interacts with	BCL10 (interacts with) BIRC2
215106	616.5617334	interacts with	CHD3 (interacts with) CTTN	FALSE	interacts with	CHD3 (interacts with) CTTN
280644	602.9629624	interacts with	BCL10 (interacts with) IKBKG	FALSE	interacts with	BCL10 (interacts with) IKBKG
215105	670.9309835	interacts with	CHD3 (interacts with) SIAHBP1	FALSE	interacts with	CHD3 (interacts with) SIAHBP1
215104	549.6981662	interacts with	CHD3 (interacts with) SAT1	FALSE	interacts with	CHD3 (interacts with) SAT1
280646	59.98631602	interacts with	BCL10 (interacts with) BIRC3	FALSE	interacts with	BCL10 (interacts with) BIRC3
215103	387.9671543	interacts with	CHD3 (interacts with) ZHX1	FALSE	interacts with	CHD3 (interacts with) ZHX1
215110	1411.634479	interacts with	CHD3 (interacts with) SUMO1	FALSE	interacts with	CHD3 (interacts with) SUMO1
215109	290.9711776	interacts with	CHD3 (interacts with) SATB1	FALSE	interacts with	CHD3 (interacts with) SATB1
215108	466.9664349	interacts with	CHD3 (interacts with) XRCC4	FALSE	interacts with	CHD3 (interacts with) XRCC4
215107	974.0246947	interacts with	CHD3 (interacts with) LUC7L2	FALSE	interacts with	CHD3 (interacts with) LUC7L2
280651	19.65964646	interacts with	BCL10 (interacts with) MALT1	FALSE	interacts with	BCL10 (interacts with) MALT1
280652	226.9770173	interacts with	BCL10 (interacts with) CARD10	FALSE	interacts with	BCL10 (interacts with) CARD10
215113	452.5073731	interacts with	CHD3 (interacts with) GPS2	FALSE	interacts with	CHD3 (interacts with) GPS2
215111	406.3429046	interacts with	CHD3 (interacts with) MAFG	FALSE	interacts with	CHD3 (interacts with) MAFG
280654	975.6717131	interacts with	C20orf18 (interacts with) UBC	FALSE	interacts with	C20orf18 (interacts with) UBC
215117	949.7074175	interacts with	CHD3 (interacts with) SLC25A6	FALSE	interacts with	CHD3 (interacts with) SLC25A6
215115	413.1225852	interacts with	CHD3 (interacts with) CSTF2	FALSE	interacts with	CHD3 (interacts with) CSTF2
280650	18.9887691	interacts with	BCL10 (interacts with) CARD11	FALSE	interacts with	BCL10 (interacts with) CARD11
280659	33.43167421	interacts with	C20orf18 (interacts with) TNF	FALSE	interacts with	C20orf18 (interacts with) TNF
215122	575.3650627	interacts with	CHD3 (interacts with) TTR	FALSE	interacts with	CHD3 (interacts with) TTR
215121	660.2197854	interacts with	CHD3 (interacts with) SAFB	FALSE	interacts with	CHD3 (interacts with) SAFB
215120	680.9608791	interacts with	CHD3 (interacts with) PAICS	FALSE	interacts with	CHD3 (interacts with) PAICS
264277	187.7487113	interacts with	ERBB2 (interacts with) ESR1	FALSE	interacts with	ERBB2 (interacts with) ESR1
215119	570.0189936	interacts with	CHD3 (interacts with) PTPRS	FALSE	interacts with	CHD3 (interacts with) PTPRS
280655	736.8285747	interacts with	C20orf18 (interacts with) IKBKG	FALSE	interacts with	C20orf18 (interacts with) IKBKG
215126	1417.155229	interacts with	CHD3 (interacts with) CPE	FALSE	interacts with	CHD3 (interacts with) CPE
215125	593.6141293	interacts with	CHD3 (interacts with) PRG2	FALSE	interacts with	CHD3 (interacts with) PRG2
280656	38.79244159	interacts with	C20orf18 (interacts with) UBE2D3	FALSE	interacts with	C20orf18 (interacts with) UBE2D3
215124	438.5136241	interacts with	CHD3 (interacts with) HSPH1	FALSE	interacts with	CHD3 (interacts with) HSPH1
280657	76.45239138	interacts with	C20orf18 (interacts with) UBE2N	FALSE	interacts with	C20orf18 (interacts with) UBE2N
215123	517.5868307	interacts with	CHD3 (interacts with) HIST1H3A	FALSE	interacts with	CHD3 (interacts with) HIST1H3A
215129	439.2824975	interacts with	CHD3 (interacts with) HIC1	FALSE	interacts with	CHD3 (interacts with) HIC1
264286	165.4903004	interacts with	ERBB2 (interacts with) KPNB1	FALSE	interacts with	ERBB2 (interacts with) KPNB1
215127	699.2831158	interacts with	CHD3 (interacts with) SUMO2	FALSE	interacts with	CHD3 (interacts with) SUMO2
264279	58.79846717	interacts with	ERBB2 (interacts with) JAK2	FALSE	interacts with	ERBB2 (interacts with) JAK2
280664	88.51175412	interacts with	C20orf18 (interacts with) UBE1	FALSE	interacts with	C20orf18 (interacts with) UBE1
264280	156.0419371	interacts with	ERBB2 (interacts with) HSPA8	FALSE	interacts with	ERBB2 (interacts with) HSPA8
215133	443.511474	interacts with	CHD3 (interacts with) FUBP1	FALSE	interacts with	CHD3 (interacts with) FUBP1
280665	30.53577725	interacts with	C20orf18 (interacts with) PRKCB1	FALSE	interacts with	C20orf18 (interacts with) PRKCB1
215132	355.5008096	interacts with	CHD3 (interacts with) IKZF1	FALSE	interacts with	CHD3 (interacts with) IKZF1
215131	436.6612486	interacts with	CHD3 (interacts with) NEFL	FALSE	interacts with	CHD3 (interacts with) NEFL
215137	660.8894585	interacts with	CHD3 (interacts with) PSME1	FALSE	interacts with	CHD3 (interacts with) PSME1
264292	80.87238772	interacts with	ERBB2 (interacts with) XPO1	FALSE	interacts with	ERBB2 (interacts with) XPO1
264293	99.0709332	interacts with	ERBB2 (interacts with) UBA52	FALSE	interacts with	ERBB2 (interacts with) UBA52
215135	1844	interacts with	CHD3 (interacts with) UBE1C	FALSE	interacts with	CHD3 (interacts with) UBE1C
264287	167.7765854	interacts with	ERBB2 (interacts with) RPS27A	FALSE	interacts with	ERBB2 (interacts with) RPS27A
215142	458.7947477	interacts with	CHD3 (interacts with) RPL29	FALSE	interacts with	CHD3 (interacts with) RPL29
215141	864.445685	interacts with	CHD3 (interacts with) RUTBC1	FALSE	interacts with	CHD3 (interacts with) RUTBC1
264288	130.8013561	interacts with	ERBB2 (interacts with) HSP90AA1	FALSE	interacts with	ERBB2 (interacts with) HSP90AA1
215139	864.445685	interacts with	CHD3 (interacts with) SGSM2	FALSE	interacts with	CHD3 (interacts with) SGSM2
215146	307.6721635	interacts with	CHD3 (interacts with) MTA3	FALSE	interacts with	CHD3 (interacts with) MTA3
215145	1437.044364	interacts with	CHD3 (interacts with) HDAC1	FALSE	interacts with	CHD3 (interacts with) HDAC1
264301	577.9935471	interacts with	ERBB2 (interacts with) UBC	FALSE	interacts with	ERBB2 (interacts with) UBC
215144	911.3910008	interacts with	CHD3 (interacts with) HDAC2	FALSE	interacts with	CHD3 (interacts with) HDAC2
215143	452.9711205	interacts with	CHD3 (interacts with) PUF60	FALSE	interacts with	CHD3 (interacts with) PUF60
215150	394.2995847	interacts with	CHD3 (interacts with) MBD3L1	FALSE	interacts with	CHD3 (interacts with) MBD3L1
215149	569.6890406	interacts with	CHD3 (interacts with) TALDO1	FALSE	interacts with	CHD3 (interacts with) TALDO1
215148	986.1463015	interacts with	CHD3 (interacts with) HYPK	FALSE	interacts with	CHD3 (interacts with) HYPK
215147	442.2761748	interacts with	CHD3 (interacts with) SERBP1	FALSE	interacts with	CHD3 (interacts with) SERBP1
215153	448.1071755	interacts with	CHD3 (interacts with) PCMT1	FALSE	interacts with	CHD3 (interacts with) PCMT1
280692	89.96105493	interacts with	UBE2N (interacts with) UBE2V1	FALSE	interacts with	UBE2N (interacts with) UBE2V1
215152	464.2072594	interacts with	CHD3 (interacts with) CRCT1	FALSE	interacts with	CHD3 (interacts with) CRCT1
264309	152.8428474	interacts with	ERBB2 (interacts with) TEC	FALSE	interacts with	ERBB2 (interacts with) TEC
264310	105.2127319	interacts with	ERBB2 (interacts with) STAT3	FALSE	interacts with	ERBB2 (interacts with) STAT3
215151	709.3477042	interacts with	CHD3 (interacts with) PTN	FALSE	interacts with	CHD3 (interacts with) PTN
215158	393.5029434	interacts with	CHD3 (interacts with) SIRT6	FALSE	interacts with	CHD3 (interacts with) SIRT6
264305	107.4751627	interacts with	ERBB2 (interacts with) ITK	FALSE	interacts with	ERBB2 (interacts with) ITK
215156	1844	interacts with	CHD3 (interacts with) SERF2	FALSE	interacts with	CHD3 (interacts with) SERF2
215155	1844	interacts with	CHD3 (interacts with) NIF3L1BP1	FALSE	interacts with	CHD3 (interacts with) NIF3L1BP1
215162	714.3736859	interacts with	CHD3 (interacts with) IKZF3	FALSE	interacts with	CHD3 (interacts with) IKZF3
264315	189.299727	interacts with	ERBB2 (interacts with) FGR	FALSE	interacts with	ERBB2 (interacts with) FGR
215160	1121.261955	interacts with	CHD3 (interacts with) TXNDC9	FALSE	interacts with	CHD3 (interacts with) TXNDC9
264318	141.6575293	interacts with	ERBB2 (interacts with) SRC	FALSE	interacts with	ERBB2 (interacts with) SRC
280695	642.9703947	interacts with	Kua-UEV (interacts with) STUB1	FALSE	interacts with	Kua-UEV (interacts with) STUB1
215165	805.432059	interacts with	CHD3 (interacts with) IK	FALSE	interacts with	CHD3 (interacts with) IK
215164	535.0116885	interacts with	CHD3 (interacts with) TAL1	FALSE	interacts with	CHD3 (interacts with) TAL1
264313	172.669779	interacts with	ERBB2 (interacts with) ITGA5	FALSE	interacts with	ERBB2 (interacts with) ITGA5
215163	270.4599388	interacts with	CHD3 (interacts with) MTA2	FALSE	interacts with	CHD3 (interacts with) MTA2
280698	96.42071945	interacts with	Kua-UEV (interacts with) RNF5	FALSE	interacts with	Kua-UEV (interacts with) RNF5
215169	516.0156494	interacts with	CHD3 (interacts with) SLC27A6	FALSE	interacts with	CHD3 (interacts with) SLC27A6
215167	597.1720997	interacts with	CHD3 (interacts with) IVNS1ABP	FALSE	interacts with	CHD3 (interacts with) IVNS1ABP
215174	618.2258868	interacts with	CHD3 (interacts with) SRRT	FALSE	interacts with	CHD3 (interacts with) SRRT
215173	494.3029446	interacts with	CHD3 (interacts with) IMMT	FALSE	interacts with	CHD3 (interacts with) IMMT
215172	376.745134	interacts with	CHD3 (interacts with) MTA1	FALSE	interacts with	CHD3 (interacts with) MTA1
215171	1844	interacts with	CHD3 (interacts with) UBA3	FALSE	interacts with	CHD3 (interacts with) UBA3
215177	588.6053349	interacts with	CHD3 (interacts with) MAN2A2	FALSE	interacts with	CHD3 (interacts with) MAN2A2
264333	133.2621423	interacts with	ERBB2 (interacts with) HSPA4	FALSE	interacts with	ERBB2 (interacts with) HSPA4
215176	646.4134622	interacts with	CHD3 (interacts with) SDCCAG3	FALSE	interacts with	CHD3 (interacts with) SDCCAG3
215182	308.1729511	interacts with	CHD3 (interacts with) MBD2	FALSE	interacts with	CHD3 (interacts with) MBD2
280711	191.527914	interacts with	Kua-UEV (interacts with) UBE2N	FALSE	interacts with	Kua-UEV (interacts with) UBE2N
215181	693.1942362	interacts with	CHD3 (interacts with) KIF15	FALSE	interacts with	CHD3 (interacts with) KIF15
215179	1844	interacts with	CHD3 (interacts with) THOC7	FALSE	interacts with	CHD3 (interacts with) THOC7
247954	124.1135453	interacts with	PPP1R8 (interacts with) SF3A2	FALSE	interacts with	PPP1R8 (interacts with) SF3A2
215186	1235.602547	interacts with	CHD3 (interacts with) TM4SF6	FALSE	interacts with	CHD3 (interacts with) TM4SF6
215185	1538.366101	interacts with	CHD3 (interacts with) TSPAN6	FALSE	interacts with	CHD3 (interacts with) TSPAN6
247952	277.9416476	interacts with	PPP1R8 (interacts with) PRKACA	FALSE	interacts with	PPP1R8 (interacts with) PRKACA
215184	1844	interacts with	CHD3 (interacts with) FAM134A	FALSE	interacts with	CHD3 (interacts with) FAM134A
215183	1844	interacts with	CHD3 (interacts with) NAB2	FALSE	interacts with	CHD3 (interacts with) NAB2
215189	1844	interacts with	CHD3 (interacts with) FBP2	FALSE	interacts with	CHD3 (interacts with) FBP2
264337	111.017363	interacts with	ERBB2 (interacts with) UBB	FALSE	interacts with	ERBB2 (interacts with) UBB
215187	531.7925723	interacts with	CHD3 (interacts with) PAI-RBP1	FALSE	interacts with	CHD3 (interacts with) PAI-RBP1
247962	162.3140056	interacts with	PPP1CC (interacts with) RAF1	FALSE	interacts with	PPP1CC (interacts with) RAF1
215194	208.7231926	interacts with	PA2G4 (interacts with) SIN3A	FALSE	interacts with	PA2G4 (interacts with) SIN3A
264348	85.5316781	interacts with	ERBB2 (interacts with) LRIG1	FALSE	interacts with	ERBB2 (interacts with) LRIG1
247961	126.818918	interacts with	PPP1CC (interacts with) RB1	FALSE	interacts with	PPP1CC (interacts with) RB1
215193	221.1194207	interacts with	PA2G4 (interacts with) RB1	FALSE	interacts with	PA2G4 (interacts with) RB1
215192	366.010998	interacts with	PA2G4 (interacts with) TRAF6	FALSE	interacts with	PA2G4 (interacts with) TRAF6
247960	298.253988	interacts with	PPP1CC (interacts with) YWHAZ	FALSE	interacts with	PPP1CC (interacts with) YWHAZ
215191	576.4212409	interacts with	CHD3 (interacts with) HABP4	FALSE	interacts with	CHD3 (interacts with) HABP4
247959	427.4558305	interacts with	PPP1CC (interacts with) TP53	FALSE	interacts with	PPP1CC (interacts with) TP53
247966	73.65253294	interacts with	PPP1CC (interacts with) SMARCB1	FALSE	interacts with	PPP1CC (interacts with) SMARCB1
264344	272.5852554	interacts with	ERBB2 (interacts with) SUPT6H	FALSE	interacts with	ERBB2 (interacts with) SUPT6H
247964	96.05852334	interacts with	PPP1CC (interacts with) TRIM28	FALSE	interacts with	PPP1CC (interacts with) TRIM28
247963	117.3978426	interacts with	PPP1CC (interacts with) VDR	FALSE	interacts with	PPP1CC (interacts with) VDR
215195	163.5531867	interacts with	PA2G4 (interacts with) PRKCA	FALSE	interacts with	PA2G4 (interacts with) PRKCA
215202	509.946387	interacts with	PA2G4 (interacts with) PRKCG	FALSE	interacts with	PA2G4 (interacts with) PRKCG
247970	125.4565721	interacts with	PPP1CC (interacts with) PRO2730	FALSE	interacts with	PPP1CC (interacts with) PRO2730
280739	366.8721715	interacts with	GNB2 (interacts with) RAF1	FALSE	interacts with	GNB2 (interacts with) RAF1
247969	145.0805638	interacts with	PPP1CC (interacts with) TP53BP2	FALSE	interacts with	PPP1CC (interacts with) TP53BP2
280740	346.1859471	interacts with	GNB2 (interacts with) TGFBR1	FALSE	interacts with	GNB2 (interacts with) TGFBR1
215201	122.9487606	interacts with	PA2G4 (interacts with) SUMO4	FALSE	interacts with	PA2G4 (interacts with) SUMO4
215200	156.5741984	interacts with	PA2G4 (interacts with) PRKCB	FALSE	interacts with	PA2G4 (interacts with) PRKCB
264358	250.9638156	interacts with	ERBB2 (interacts with) STUB1	FALSE	interacts with	ERBB2 (interacts with) STUB1
247967	167.4456458	interacts with	PPP1CC (interacts with) ZFYVE9	FALSE	interacts with	PPP1CC (interacts with) ZFYVE9
280742	616.9479052	interacts with	GNB2 (interacts with) MAP3K3	FALSE	interacts with	GNB2 (interacts with) MAP3K3
280735	403.6698448	interacts with	GNB2 (interacts with) GNGT1	FALSE	interacts with	GNB2 (interacts with) GNGT1
280736	2739.55096	interacts with	GNB2 (interacts with) UBC	FALSE	interacts with	GNB2 (interacts with) UBC
247973	126.5201244	interacts with	PPP1CC (interacts with) PPP1R10	FALSE	interacts with	PPP1CC (interacts with) PPP1R10
280737	788.3496404	interacts with	GNB2 (interacts with) TRAF6	FALSE	interacts with	GNB2 (interacts with) TRAF6
247972	180.7787925	interacts with	PPP1CC (interacts with) PPP1R2	FALSE	interacts with	PPP1CC (interacts with) PPP1R2
215203	82.28472397	interacts with	PA2G4 (interacts with) SGK	FALSE	interacts with	PA2G4 (interacts with) SGK
280738	525.2818071	interacts with	GNB2 (interacts with) IKBKE	FALSE	interacts with	GNB2 (interacts with) IKBKE
247978	209.7979652	interacts with	PPP1CC (interacts with) PPP1R8	FALSE	interacts with	PPP1CC (interacts with) PPP1R8
247977	105.7372545	interacts with	PPP1CC (interacts with) PPP1R15A	FALSE	interacts with	PPP1CC (interacts with) PPP1R15A
247976	228.9873359	interacts with	PPP1CC (interacts with) PPP1R9B	FALSE	interacts with	PPP1CC (interacts with) PPP1R9B
280749	3051.198612	interacts with	GNB2 (interacts with) GNG5	FALSE	interacts with	GNB2 (interacts with) GNG5
280745	246.0152699	interacts with	GNB2 (interacts with) ID3	FALSE	interacts with	GNB2 (interacts with) ID3
264369	65.80643582	interacts with	ERBB2 (interacts with) ERBB4	FALSE	interacts with	ERBB2 (interacts with) ERBB4
264370	176.8870503	interacts with	ERBB2 (interacts with) HSPCA	FALSE	interacts with	ERBB2 (interacts with) HSPCA
264375	58.85303657	interacts with	ERBB2 (interacts with) ERBB3	FALSE	interacts with	ERBB2 (interacts with) ERBB3
280782	230.5047291	interacts with	IRAK1 (interacts with) JUN	FALSE	interacts with	IRAK1 (interacts with) JUN
248018	418.1787355	interacts with	FLJ10006 (interacts with) WDR48	FALSE	interacts with	FLJ10006 (interacts with) WDR48
280787	52.28875596	interacts with	IRAK1 (interacts with) MAP3K7	FALSE	interacts with	IRAK1 (interacts with) MAP3K7
248017	1190.392304	interacts with	FLJ10006 (interacts with) POLR2A	FALSE	interacts with	FLJ10006 (interacts with) POLR2A
280789	65.47494589	interacts with	IRAK1 (interacts with) RIPK2	FALSE	interacts with	IRAK1 (interacts with) RIPK2
264399	1844	interacts with	HPCA (interacts with) NMT1	FALSE	interacts with	HPCA (interacts with) NMT1
280783	141.4985347	interacts with	IRAK1 (interacts with) STAT3	FALSE	interacts with	IRAK1 (interacts with) STAT3
280784	176.3581151	interacts with	IRAK1 (interacts with) SUMO1	FALSE	interacts with	IRAK1 (interacts with) SUMO1
280785	115.9258124	interacts with	IRAK1 (interacts with) MAPK14	FALSE	interacts with	IRAK1 (interacts with) MAPK14
248019	243.1595605	interacts with	FLJ10006 (interacts with) SUPT6H	FALSE	interacts with	FLJ10006 (interacts with) SUPT6H
280786	204.4616852	interacts with	IRAK1 (interacts with) PPP2CA	FALSE	interacts with	IRAK1 (interacts with) PPP2CA
280798	1435.034473	interacts with	IRAK1 (interacts with) ITGAM	FALSE	interacts with	IRAK1 (interacts with) ITGAM
280792	911.5655095	interacts with	IRAK1 (interacts with) UBC	FALSE	interacts with	IRAK1 (interacts with) UBC
280812	331.0908972	interacts with	IRAK1 (interacts with) TRAF6	FALSE	interacts with	IRAK1 (interacts with) TRAF6
231661	1844	interacts with	RUNDC3A (interacts with) TFPT	FALSE	interacts with	RUNDC3A (interacts with) TFPT
280809	71.68415157	interacts with	IRAK1 (interacts with) SQSTM1	FALSE	interacts with	IRAK1 (interacts with) SQSTM1
248065	1844	interacts with	ADCK1 (interacts with) RAB1A	FALSE	interacts with	ADCK1 (interacts with) RAB1A
198953	442.9739	interacts with	BAIAP2L1 (interacts with) TERF1	FALSE	interacts with	BAIAP2L1 (interacts with) TERF1
198952	230.0316688	interacts with	BAIAP2L1 (interacts with) TERF2	FALSE	interacts with	BAIAP2L1 (interacts with) TERF2
198951	998.9386391	interacts with	BAIAP2L1 (interacts with) YWHAG	FALSE	interacts with	BAIAP2L1 (interacts with) YWHAG
248110	314.8229493	interacts with	GGA3 (interacts with) RPS27A	FALSE	interacts with	GGA3 (interacts with) RPS27A
198957	129.4765782	interacts with	BAIAP2L1 (interacts with) PRKAA2	FALSE	interacts with	BAIAP2L1 (interacts with) PRKAA2
198955	341.4700363	interacts with	BAIAP2L1 (interacts with) FASLG	FALSE	interacts with	BAIAP2L1 (interacts with) FASLG
248114	247.314538	interacts with	GGA3 (interacts with) RABEP1	FALSE	interacts with	GGA3 (interacts with) RABEP1
248112	1657.11127	interacts with	GGA3 (interacts with) UBC	FALSE	interacts with	GGA3 (interacts with) UBC
198959	87.04170718	interacts with	BAIAP2L1 (interacts with) PRKAB2	FALSE	interacts with	BAIAP2L1 (interacts with) PRKAB2
248111	170.4076878	interacts with	GGA3 (interacts with) RNF11	FALSE	interacts with	GGA3 (interacts with) RNF11
248116	530.9538632	interacts with	GGA3 (interacts with) VPS11	FALSE	interacts with	GGA3 (interacts with) VPS11
264507	669.950592	interacts with	MYST2 (interacts with) TP53	FALSE	interacts with	MYST2 (interacts with) TP53
231738	218.6499222	interacts with	CSNK2A1 (interacts with) SP1	FALSE	interacts with	CSNK2A1 (interacts with) SP1
231737	273.5719022	interacts with	CSNK2A1 (interacts with) RELA	FALSE	interacts with	CSNK2A1 (interacts with) RELA
264508	238.0321453	interacts with	MYST2 (interacts with) PLK1	FALSE	interacts with	MYST2 (interacts with) PLK1
231736	391.8830039	interacts with	CSNK2A1 (interacts with) SRC	FALSE	interacts with	CSNK2A1 (interacts with) SRC
264509	234.3727451	interacts with	MYST2 (interacts with) RIF1	FALSE	interacts with	MYST2 (interacts with) RIF1
231735	2731.911023	interacts with	CSNK2A1 (interacts with) UBC	FALSE	interacts with	CSNK2A1 (interacts with) UBC
248126	224.8917725	interacts with	PRKAR1A (interacts with) UBE2I	FALSE	interacts with	PRKAR1A (interacts with) UBE2I
248125	224.1278972	interacts with	PRKAR1A (interacts with) SMAD2	FALSE	interacts with	PRKAR1A (interacts with) SMAD2
248124	1282.938396	interacts with	PRKAR1A (interacts with) UBC	FALSE	interacts with	PRKAR1A (interacts with) UBC
231740	269.3625127	interacts with	CSNK2A1 (interacts with) SIN3A	FALSE	interacts with	CSNK2A1 (interacts with) SIN3A
231739	507.0987226	interacts with	CSNK2A1 (interacts with) HSPCA	FALSE	interacts with	CSNK2A1 (interacts with) HSPCA
248129	167.6212766	interacts with	PRKAR1A (interacts with) PRPF40A	FALSE	interacts with	PRKAR1A (interacts with) PRPF40A
264516	608.5067952	interacts with	MYST2 (interacts with) NINL	FALSE	interacts with	MYST2 (interacts with) NINL
231745	314.7539715	interacts with	CSNK2A1 (interacts with) FOS	FALSE	interacts with	CSNK2A1 (interacts with) FOS
248127	183.6900096	interacts with	PRKAR1A (interacts with) SET	FALSE	interacts with	PRKAR1A (interacts with) SET
231743	274.3228201	interacts with	CSNK2A1 (interacts with) MAPK14	FALSE	interacts with	CSNK2A1 (interacts with) MAPK14
264511	93.10610297	interacts with	MYST2 (interacts with) SAT	FALSE	interacts with	MYST2 (interacts with) SAT
231750	273.2610464	interacts with	CSNK2A1 (interacts with) VDR	FALSE	interacts with	CSNK2A1 (interacts with) VDR
264512	144.4303559	interacts with	MYST2 (interacts with) ORC1L	FALSE	interacts with	MYST2 (interacts with) ORC1L
248133	123.2067675	interacts with	PRKAR1A (interacts with) SLC2A4	FALSE	interacts with	PRKAR1A (interacts with) SLC2A4
264513	103.9235511	interacts with	MYST2 (interacts with) SAT1	FALSE	interacts with	MYST2 (interacts with) SAT1
264523	198.3295166	interacts with	MYST2 (interacts with) RPS10	FALSE	interacts with	MYST2 (interacts with) RPS10
248146	338.2375452	interacts with	PRKCB (interacts with) RB1	FALSE	interacts with	PRKCB (interacts with) RB1
231762	441.2860797	interacts with	CSNK2A1 (interacts with) MYC	FALSE	interacts with	CSNK2A1 (interacts with) MYC
248145	356.7218359	interacts with	PRKCB (interacts with) YWHAG	FALSE	interacts with	PRKCB (interacts with) YWHAG
264532	299.8960216	interacts with	KIF5B (interacts with) SMAD2	FALSE	interacts with	KIF5B (interacts with) SMAD2
248150	731.5630558	interacts with	PRKCB (interacts with) VTN	FALSE	interacts with	PRKCB (interacts with) VTN
264527	214.7628042	interacts with	MYST2 (interacts with) RGL2	FALSE	interacts with	MYST2 (interacts with) RGL2
215381	27.60092944	interacts with	USP14 (interacts with) p44S10	FALSE	interacts with	USP14 (interacts with) p44S10
215380	148.9641163	interacts with	USP14 (interacts with) USP7	FALSE	interacts with	USP14 (interacts with) USP7
264529	498.6178473	interacts with	MYST2 (interacts with) VIM	FALSE	interacts with	MYST2 (interacts with) VIM
231769	363.5758907	interacts with	CSNK2A1 (interacts with) EEF1D	FALSE	interacts with	CSNK2A1 (interacts with) EEF1D
231767	218.4454299	interacts with	CSNK2A1 (interacts with) MYB	FALSE	interacts with	CSNK2A1 (interacts with) MYB
231774	390.0118433	interacts with	CSNK2A1 (interacts with) HDAC1	FALSE	interacts with	CSNK2A1 (interacts with) HDAC1
231773	720.9760009	interacts with	CSNK2A1 (interacts with) PTPRC	FALSE	interacts with	CSNK2A1 (interacts with) PTPRC
248162	250.6267047	interacts with	MARCKS (interacts with) NMT1	FALSE	interacts with	MARCKS (interacts with) NMT1
231777	185.7843393	interacts with	CSNK2A1 (interacts with) HSF1	FALSE	interacts with	CSNK2A1 (interacts with) HSF1
248160	1065.740282	interacts with	MARCKS (interacts with) TRAF6	FALSE	interacts with	MARCKS (interacts with) TRAF6
264549	257.0112352	interacts with	KIF5B (interacts with) YWHAZ	FALSE	interacts with	KIF5B (interacts with) YWHAZ
231776	544.6480979	interacts with	CSNK2A1 (interacts with) WDR48	FALSE	interacts with	CSNK2A1 (interacts with) WDR48
264550	173.6743552	interacts with	KIF5B (interacts with) KTN1	FALSE	interacts with	KIF5B (interacts with) KTN1
231775	238.7921398	interacts with	CSNK2A1 (interacts with) JUN	FALSE	interacts with	CSNK2A1 (interacts with) JUN
264543	241.5313881	interacts with	KIF5B (interacts with) YWHAG	FALSE	interacts with	KIF5B (interacts with) YWHAG
248165	136.3611953	interacts with	MARCKS (interacts with) PRKCB	FALSE	interacts with	MARCKS (interacts with) PRKCB
264546	87.4538393	interacts with	KIF5B (interacts with) MARK2	FALSE	interacts with	KIF5B (interacts with) MARK2
248163	331.8717834	interacts with	MARCKS (interacts with) PRKCA	FALSE	interacts with	MARCKS (interacts with) PRKCA
231786	484.7043629	interacts with	CSNK2A1 (interacts with) SAT1	FALSE	interacts with	CSNK2A1 (interacts with) SAT1
231785	334.241036	interacts with	CSNK2A1 (interacts with) ZHX1	FALSE	interacts with	CSNK2A1 (interacts with) ZHX1
231789	1680.725283	interacts with	CSNK2A1 (interacts with) FGF2	FALSE	interacts with	CSNK2A1 (interacts with) FGF2
231794	253.3653537	interacts with	CSNK2A1 (interacts with) XRCC4	FALSE	interacts with	CSNK2A1 (interacts with) XRCC4
231791	303.5953672	interacts with	CSNK2A1 (interacts with) PSMA3	FALSE	interacts with	CSNK2A1 (interacts with) PSMA3
231798	181.9746412	interacts with	CSNK2A1 (interacts with) PTEN	FALSE	interacts with	CSNK2A1 (interacts with) PTEN
231803	419.8640594	interacts with	CSNK2A1 (interacts with) NFKBIA	FALSE	interacts with	CSNK2A1 (interacts with) NFKBIA
280963	680.0349852	interacts with	PCNA (interacts with) TRAF6	FALSE	interacts with	PCNA (interacts with) TRAF6
280964	244.5740818	interacts with	PCNA (interacts with) PRKDC	FALSE	interacts with	PCNA (interacts with) PRKDC
280965	270.2395798	interacts with	PCNA (interacts with) RUVBL2	FALSE	interacts with	PCNA (interacts with) RUVBL2
231807	511.610912	interacts with	CSNK2A1 (interacts with) GMNN	FALSE	interacts with	CSNK2A1 (interacts with) GMNN
280966	1900.267829	interacts with	PCNA (interacts with) PPP1CA	FALSE	interacts with	PCNA (interacts with) PPP1CA
231813	391.8372208	interacts with	CSNK2A1 (interacts with) PPP1R8	FALSE	interacts with	CSNK2A1 (interacts with) PPP1R8
231811	5708.292448	interacts with	CSNK2A1 (interacts with) VTN	FALSE	interacts with	CSNK2A1 (interacts with) VTN
280971	354.1916698	interacts with	PCNA (interacts with) WDR48	FALSE	interacts with	PCNA (interacts with) WDR48
231818	273.7994612	interacts with	CSNK2A1 (interacts with) PSMA4	FALSE	interacts with	CSNK2A1 (interacts with) PSMA4
280973	1224.322226	interacts with	PCNA (interacts with) UBC	FALSE	interacts with	PCNA (interacts with) UBC
280974	469.2673062	interacts with	PCNA (interacts with) RAD9A	FALSE	interacts with	PCNA (interacts with) RAD9A
280970	236.1781544	interacts with	PCNA (interacts with) RPA1	FALSE	interacts with	PCNA (interacts with) RPA1
231824	688.956866	interacts with	CSNK2A1 (interacts with) RNF7	FALSE	interacts with	CSNK2A1 (interacts with) RNF7
231823	469.0545243	interacts with	CSNK2A1 (interacts with) ERH	FALSE	interacts with	CSNK2A1 (interacts with) ERH
280988	250.9539048	interacts with	PCNA (interacts with) UBA52	FALSE	interacts with	PCNA (interacts with) UBA52
280985	389.5595874	interacts with	PCNA (interacts with) RPS27A	FALSE	interacts with	PCNA (interacts with) RPS27A
231836	241.0557226	interacts with	CSNK2A1 (interacts with) MAX	FALSE	interacts with	CSNK2A1 (interacts with) MAX
280998	1103.256284	interacts with	PCNA (interacts with) SETMAR	FALSE	interacts with	PCNA (interacts with) SETMAR
231843	500.8717997	interacts with	CSNK2A1 (interacts with) NOL3	FALSE	interacts with	CSNK2A1 (interacts with) NOL3
281003	189.1843354	interacts with	PCNA (interacts with) RAD18	FALSE	interacts with	PCNA (interacts with) RAD18
231854	369.1587498	interacts with	CSNK2A1 (interacts with) HSP90AA1	FALSE	interacts with	CSNK2A1 (interacts with) HSP90AA1
281000	1759.16687	interacts with	PCNA (interacts with) POLK	FALSE	interacts with	PCNA (interacts with) POLK
281002	266.4759527	interacts with	PCNA (interacts with) UBB	FALSE	interacts with	PCNA (interacts with) UBB
231857	537.0682531	interacts with	CSNK2A1 (interacts with) PPP1R2	FALSE	interacts with	CSNK2A1 (interacts with) PPP1R2
231865	270.9467362	interacts with	CSNK2A1 (interacts with) SRF	FALSE	interacts with	CSNK2A1 (interacts with) SRF
281022	292.0697855	interacts with	FEN1 (interacts with) HNRPA1	FALSE	interacts with	FEN1 (interacts with) HNRPA1
281017	468.227103	interacts with	PCNA (interacts with) POLH	FALSE	interacts with	PCNA (interacts with) POLH
281029	374.7742237	interacts with	FEN1 (interacts with) PCNA	FALSE	interacts with	FEN1 (interacts with) PCNA
281023	129.5846638	interacts with	FEN1 (interacts with) RAD9A	FALSE	interacts with	FEN1 (interacts with) RAD9A
281024	117.9397982	interacts with	FEN1 (interacts with) HUS1	FALSE	interacts with	FEN1 (interacts with) HUS1
281025	105.1865726	interacts with	FEN1 (interacts with) RAD1	FALSE	interacts with	FEN1 (interacts with) RAD1
231883	794.5055525	interacts with	CSNK2A1 (interacts with) PPP1R1B	FALSE	interacts with	CSNK2A1 (interacts with) PPP1R1B
231890	265.3363508	interacts with	CSNK2A1 (interacts with) HDAC2	FALSE	interacts with	CSNK2A1 (interacts with) HDAC2
231898	585.7584751	interacts with	CSNK2A1 (interacts with) TP53	FALSE	interacts with	CSNK2A1 (interacts with) TP53
248290	166.5407071	interacts with	UBE1 (interacts with) UBE2I	FALSE	interacts with	UBE1 (interacts with) UBE2I
248289	232.1603586	interacts with	UBE1 (interacts with) YWHAZ	FALSE	interacts with	UBE1 (interacts with) YWHAZ
248291	47.40813976	interacts with	UBE1 (interacts with) UBE2D2	FALSE	interacts with	UBE1 (interacts with) UBE2D2
231915	499.1050091	interacts with	CSNK2A1 (interacts with) HCLS1	FALSE	interacts with	CSNK2A1 (interacts with) HCLS1
215538	137.0260556	interacts with	TRIM31 (interacts with) UBE2D1	FALSE	interacts with	TRIM31 (interacts with) UBE2D1
231921	277.9390826	interacts with	CSNK2A1 (interacts with) HSPH1	FALSE	interacts with	CSNK2A1 (interacts with) HSPH1
215540	105.7774087	interacts with	TRIM31 (interacts with) UBE2D3	FALSE	interacts with	TRIM31 (interacts with) UBE2D3
215539	167.6251992	interacts with	TRIM31 (interacts with) UBE2D2	FALSE	interacts with	TRIM31 (interacts with) UBE2D2
199190	136.0126659	interacts with	BHLHB2 (interacts with) UBE2I	FALSE	interacts with	BHLHB2 (interacts with) UBE2I
199189	225.1257894	interacts with	BHLHB2 (interacts with) MDM2	FALSE	interacts with	BHLHB2 (interacts with) MDM2
199188	579.7311037	interacts with	BHLHB2 (interacts with) TP53	FALSE	interacts with	BHLHB2 (interacts with) TP53
199194	221.259302	interacts with	BHLHB2 (interacts with) CHD3	FALSE	interacts with	BHLHB2 (interacts with) CHD3
199193	285.3881958	interacts with	BHLHB2 (interacts with) VIM	FALSE	interacts with	BHLHB2 (interacts with) VIM
199192	207.9262728	interacts with	BHLHB2 (interacts with) SUMO1	FALSE	interacts with	BHLHB2 (interacts with) SUMO1
199191	222.0954851	interacts with	BHLHB2 (interacts with) STAT3	FALSE	interacts with	BHLHB2 (interacts with) STAT3
199200	51.47371063	interacts with	BHLHB2 (interacts with) ZHX1	FALSE	interacts with	BHLHB2 (interacts with) ZHX1
264735	754.762375	interacts with	SMC4L1 (interacts with) UBC	FALSE	interacts with	SMC4L1 (interacts with) UBC
264737	99.71634308	interacts with	SMC4L1 (interacts with) TRAF3IP1	FALSE	interacts with	SMC4L1 (interacts with) TRAF3IP1
199228	1844	interacts with	APIN (interacts with) IKBKG	FALSE	interacts with	APIN (interacts with) IKBKG
199234	1844	interacts with	ACBD6 (interacts with) IKBKG	FALSE	interacts with	ACBD6 (interacts with) IKBKG
232000	746.2081833	interacts with	SRC (interacts with) TRAF6	FALSE	interacts with	SRC (interacts with) TRAF6
231999	384.0044233	interacts with	SRC (interacts with) YWHAG	FALSE	interacts with	SRC (interacts with) YWHAG
199238	719.155812	interacts with	HNRPU (interacts with) UBC	FALSE	interacts with	HNRPU (interacts with) UBC
232006	318.3239383	interacts with	SRC (interacts with) SRF	FALSE	interacts with	SRC (interacts with) SRF
199237	735.6862493	interacts with	GART (interacts with) IKBKG	FALSE	interacts with	GART (interacts with) IKBKG
199236	1108.313751	interacts with	GART (interacts with) UBC	FALSE	interacts with	GART (interacts with) UBC
199241	139.1622542	interacts with	HNRPU (interacts with) MYC	FALSE	interacts with	HNRPU (interacts with) MYC
199240	1104.155909	interacts with	HNRPU (interacts with) IKBKG	FALSE	interacts with	HNRPU (interacts with) IKBKG
199239	162.9298635	interacts with	HNRPU (interacts with) YWHAZ	FALSE	interacts with	HNRPU (interacts with) YWHAZ
199246	135.2962274	interacts with	HNRPU (interacts with) IKBKB	FALSE	interacts with	HNRPU (interacts with) IKBKB
199245	129.6361455	interacts with	HNRPU (interacts with) POLR2A	FALSE	interacts with	HNRPU (interacts with) POLR2A
199243	154.3676958	interacts with	HNRPU (interacts with) NR3C1	FALSE	interacts with	HNRPU (interacts with) NR3C1
199249	91.19050794	interacts with	HNRPU (interacts with) PPP2R2B	FALSE	interacts with	HNRPU (interacts with) PPP2R2B
199254	142.0816969	interacts with	HNRPU (interacts with) MAX	FALSE	interacts with	HNRPU (interacts with) MAX
199252	146.7720768	interacts with	HNRPU (interacts with) RUVBL2	FALSE	interacts with	HNRPU (interacts with) RUVBL2
199251	89.19954069	interacts with	HNRPU (interacts with) MAP3K14	FALSE	interacts with	HNRPU (interacts with) MAP3K14
199258	85.37117099	interacts with	HNRPU (interacts with) TNFRSF1B	FALSE	interacts with	HNRPU (interacts with) TNFRSF1B
199257	71.19048326	interacts with	HNRPU (interacts with) NFKB2	FALSE	interacts with	HNRPU (interacts with) NFKB2
199261	75.87079431	interacts with	HNRPU (interacts with) NFKBIB	FALSE	interacts with	HNRPU (interacts with) NFKBIB
264803	1315.519873	interacts with	RUVBL2 (interacts with) UBC	FALSE	interacts with	RUVBL2 (interacts with) UBC
199265	372.7247594	interacts with	HNRPU (interacts with) SMN1	FALSE	interacts with	HNRPU (interacts with) SMN1
264804	340.1960755	interacts with	RUVBL2 (interacts with) YWHAZ	FALSE	interacts with	RUVBL2 (interacts with) YWHAZ
264805	531.2921513	interacts with	RUVBL2 (interacts with) TRAF6	FALSE	interacts with	RUVBL2 (interacts with) TRAF6
264806	322.5669952	interacts with	RUVBL2 (interacts with) TRAF2	FALSE	interacts with	RUVBL2 (interacts with) TRAF2
199274	51.78839373	interacts with	HNRPU (interacts with) TANK	FALSE	interacts with	HNRPU (interacts with) TANK
264811	121.2983859	interacts with	RUVBL2 (interacts with) TRIM28	FALSE	interacts with	RUVBL2 (interacts with) TRIM28
232041	233.8041049	interacts with	SRC (interacts with) VDR	FALSE	interacts with	SRC (interacts with) VDR
264812	125.5212522	interacts with	RUVBL2 (interacts with) TBK1	FALSE	interacts with	RUVBL2 (interacts with) TBK1
232040	422.5829959	interacts with	SRC (interacts with) TYRO3	FALSE	interacts with	SRC (interacts with) TYRO3
264814	221.3688914	interacts with	RUVBL2 (interacts with) UCHL5	FALSE	interacts with	RUVBL2 (interacts with) UCHL5
199271	160.8090322	interacts with	HNRPU (interacts with) TCERG1	FALSE	interacts with	HNRPU (interacts with) TCERG1
264807	211.8780901	interacts with	RUVBL2 (interacts with) USP7	FALSE	interacts with	RUVBL2 (interacts with) USP7
232044	171.5325997	interacts with	SRC (interacts with) STAT3	FALSE	interacts with	SRC (interacts with) STAT3
264810	209.7824182	interacts with	RUVBL2 (interacts with) TAF9	FALSE	interacts with	RUVBL2 (interacts with) TAF9
264822	296.3682589	interacts with	RUVBL2 (interacts with) UXT	FALSE	interacts with	RUVBL2 (interacts with) UXT
199286	396.3722908	interacts with	HNRPU (interacts with) NDN	FALSE	interacts with	HNRPU (interacts with) NDN
264816	265.3146938	interacts with	RUVBL2 (interacts with) TNFRSF14	FALSE	interacts with	RUVBL2 (interacts with) TNFRSF14
264825	2948.737084	interacts with	RUVBL2 (interacts with) TFPT	FALSE	interacts with	RUVBL2 (interacts with) TFPT
199326	583.6120771	interacts with	IPO9 (interacts with) MYC	FALSE	interacts with	IPO9 (interacts with) MYC
281262	344.171524	interacts with	MET (interacts with) SRC	FALSE	interacts with	MET (interacts with) SRC
215729	1409.478642	interacts with	CCDC85B (interacts with) CDKN1A	FALSE	interacts with	CCDC85B (interacts with) CDKN1A
264885	219.0070025	interacts with	ATM (interacts with) HDAC1	FALSE	interacts with	ATM (interacts with) HDAC1
281263	491.6285625	interacts with	MET (interacts with) YWHAZ	FALSE	interacts with	MET (interacts with) YWHAZ
281264	202.5654667	interacts with	MET (interacts with) STAT3	FALSE	interacts with	MET (interacts with) STAT3
264891	179.6148697	interacts with	ATM (interacts with) TERF2	FALSE	interacts with	ATM (interacts with) TERF2
264894	1219.433914	interacts with	ATM (interacts with) PPP1CA	FALSE	interacts with	ATM (interacts with) PPP1CA
281271	1730.558165	interacts with	MET (interacts with) UBC	FALSE	interacts with	MET (interacts with) UBC
264887	145.3590815	interacts with	ATM (interacts with) MDM2	FALSE	interacts with	ATM (interacts with) MDM2
264888	1937.598434	interacts with	ATM (interacts with) IKBKG	FALSE	interacts with	ATM (interacts with) IKBKG
215746	322.8186952	interacts with	CCDC85B (interacts with) MCM10	FALSE	interacts with	CCDC85B (interacts with) MCM10
199361	1844	interacts with	C19orf12 (interacts with) IKBKG	FALSE	interacts with	C19orf12 (interacts with) IKBKG
215743	447.7132543	interacts with	CCDC85B (interacts with) PSMC1	FALSE	interacts with	CCDC85B (interacts with) PSMC1
215750	467.4246682	interacts with	CCDC85B (interacts with) PSMC6	FALSE	interacts with	CCDC85B (interacts with) PSMC6
264897	89.85746696	interacts with	ATM (interacts with) SMARCB1	FALSE	interacts with	ATM (interacts with) SMARCB1
199363	1844	interacts with	FLJ11336 (interacts with) IKBKG	FALSE	interacts with	FLJ11336 (interacts with) IKBKG
264898	176.9326122	interacts with	ATM (interacts with) KAT5	FALSE	interacts with	ATM (interacts with) KAT5
264908	87.09280868	interacts with	ATM (interacts with) FOXO3A	FALSE	interacts with	ATM (interacts with) FOXO3A
264910	279.6624718	interacts with	ATM (interacts with) TOPBP1	FALSE	interacts with	ATM (interacts with) TOPBP1
264905	133.3049029	interacts with	ATM (interacts with) CDC6	FALSE	interacts with	ATM (interacts with) CDC6
264915	105.4082524	interacts with	ATM (interacts with) PRKDC	FALSE	interacts with	ATM (interacts with) PRKDC
264918	155.7771857	interacts with	ATM (interacts with) TERF1	FALSE	interacts with	ATM (interacts with) TERF1
264924	149.2179797	interacts with	ATM (interacts with) RRM2B	FALSE	interacts with	ATM (interacts with) RRM2B
264919	172.8465651	interacts with	ATM (interacts with) CREB1	FALSE	interacts with	ATM (interacts with) CREB1
264920	165.4585597	interacts with	ATM (interacts with) TREX1	FALSE	interacts with	ATM (interacts with) TREX1
199393	1844	interacts with	FLJ10154 (interacts with) IKBKG	FALSE	interacts with	FLJ10154 (interacts with) IKBKG
264928	49.14370697	interacts with	ATM (interacts with) ATR	FALSE	interacts with	ATM (interacts with) ATR
215779	370.151372	interacts with	CCDC85B (interacts with) LRDD	FALSE	interacts with	CCDC85B (interacts with) LRDD
264939	470.2752843	interacts with	ATM (interacts with) RAD9A	FALSE	interacts with	ATM (interacts with) RAD9A
264936	104.1273233	interacts with	ATM (interacts with) FANCD2	FALSE	interacts with	ATM (interacts with) FANCD2
199412	373.4073861	interacts with	TRAF3IP2 (interacts with) TRAF6	FALSE	interacts with	TRAF3IP2 (interacts with) TRAF6
199418	1844	interacts with	ARPP-19 (interacts with) IKBKG	FALSE	interacts with	ARPP-19 (interacts with) IKBKG
264956	324.2120701	interacts with	ATM (interacts with) TP53	FALSE	interacts with	ATM (interacts with) TP53
199416	1844	interacts with	AVPI1 (interacts with) IKBKG	FALSE	interacts with	AVPI1 (interacts with) IKBKG
264952	125.2830727	interacts with	ATM (interacts with) H2AFX	FALSE	interacts with	ATM (interacts with) H2AFX
264953	269.1708863	interacts with	ATM (interacts with) RAD17	FALSE	interacts with	ATM (interacts with) RAD17
264963	130.3097355	interacts with	ATM (interacts with) CDK4	FALSE	interacts with	ATM (interacts with) CDK4
281348	379.8053887	interacts with	GNAZ (interacts with) NMT1	FALSE	interacts with	GNAZ (interacts with) NMT1
264964	119.1698092	interacts with	ATM (interacts with) CHEK2	FALSE	interacts with	ATM (interacts with) CHEK2
248582	356.2380086	interacts with	TGFB2 (interacts with) VTN	FALSE	interacts with	TGFB2 (interacts with) VTN
248581	731.8819462	interacts with	TGFB2 (interacts with) TGFBR1	FALSE	interacts with	TGFB2 (interacts with) TGFBR1
264960	92.83462305	interacts with	ATM (interacts with) BRCA1	FALSE	interacts with	ATM (interacts with) BRCA1
264962	141.8148494	interacts with	ATM (interacts with) RAD51	FALSE	interacts with	ATM (interacts with) RAD51
248585	272.3429675	interacts with	TGFB2 (interacts with) TGFBR2	FALSE	interacts with	TGFB2 (interacts with) TGFBR2
281356	648.8123156	interacts with	9-Sep (interacts with) TRAF6	FALSE	interacts with	9-Sep (interacts with) TRAF6
281353	1474.745842	interacts with	GNAZ (interacts with) PRKCD	FALSE	interacts with	GNAZ (interacts with) PRKCD
199436	1844	interacts with	FKSG44 (interacts with) IKBKG	FALSE	interacts with	FKSG44 (interacts with) IKBKG
199441	1844	interacts with	FLJ00060 (interacts with) IKBKG	FALSE	interacts with	FLJ00060 (interacts with) IKBKG
248602	96.55238704	interacts with	CAV1 (interacts with) MAPK1	FALSE	interacts with	CAV1 (interacts with) MAPK1
248601	181.4008973	interacts with	CAV1 (interacts with) FYN	FALSE	interacts with	CAV1 (interacts with) FYN
248600	428.0840964	interacts with	CAV1 (interacts with) TRAF6	FALSE	interacts with	CAV1 (interacts with) TRAF6
248599	218.3660556	interacts with	CAV1 (interacts with) ESR1	FALSE	interacts with	CAV1 (interacts with) ESR1
248606	180.3522599	interacts with	CAV1 (interacts with) RAC1	FALSE	interacts with	CAV1 (interacts with) RAC1
248605	168.0663147	interacts with	CAV1 (interacts with) TGFBR1	FALSE	interacts with	CAV1 (interacts with) TGFBR1
248604	268.4935933	interacts with	CAV1 (interacts with) CSNK2A1	FALSE	interacts with	CAV1 (interacts with) CSNK2A1
248603	199.3141331	interacts with	CAV1 (interacts with) PRKACA	FALSE	interacts with	CAV1 (interacts with) PRKACA
248609	115.2333637	interacts with	CAV1 (interacts with) ERBB2	FALSE	interacts with	CAV1 (interacts with) ERBB2
248607	72.09088964	interacts with	CAV1 (interacts with) MAPK3	FALSE	interacts with	CAV1 (interacts with) MAPK3
248612	241.1510602	interacts with	CAV1 (interacts with) HRAS	FALSE	interacts with	CAV1 (interacts with) HRAS
248611	61.06168459	interacts with	CAV1 (interacts with) CDH1	FALSE	interacts with	CAV1 (interacts with) CDH1
265003	84.10637105	interacts with	FANCD2 (interacts with) PCNA	FALSE	interacts with	FANCD2 (interacts with) PCNA
281387	2	interacts with	VPS52 (interacts with) VPS53	FALSE	interacts with	VPS52 (interacts with) VPS53
265004	89.03347014	interacts with	FANCD2 (interacts with) H2AFX	FALSE	interacts with	FANCD2 (interacts with) H2AFX
248617	163.428678	interacts with	CAV1 (interacts with) TNFRSF1B	FALSE	interacts with	CAV1 (interacts with) TNFRSF1B
265005	136.8724535	interacts with	FANCD2 (interacts with) TNFRSF1A	FALSE	interacts with	FANCD2 (interacts with) TNFRSF1A
265006	135.0777496	interacts with	FANCD2 (interacts with) RAD51	FALSE	interacts with	FANCD2 (interacts with) RAD51
248615	1045.912858	interacts with	CAV1 (interacts with) PPP1CA	FALSE	interacts with	CAV1 (interacts with) PPP1CA
248621	194.9342887	interacts with	CAV1 (interacts with) FLNA	FALSE	interacts with	CAV1 (interacts with) FLNA
265001	665.9221327	interacts with	FANCD2 (interacts with) UBC	FALSE	interacts with	FANCD2 (interacts with) UBC
265002	267.1906358	interacts with	FANCD2 (interacts with) TRAF6	FALSE	interacts with	FANCD2 (interacts with) TRAF6
265011	125.7496971	interacts with	FANCD2 (interacts with) UBB	FALSE	interacts with	FANCD2 (interacts with) UBB
265012	155.131143	interacts with	FANCD2 (interacts with) WDR48	FALSE	interacts with	FANCD2 (interacts with) WDR48
265013	76.57190062	interacts with	FANCD2 (interacts with) MEN1	FALSE	interacts with	FANCD2 (interacts with) MEN1
248623	213.9662122	interacts with	CAV1 (interacts with) ILK	FALSE	interacts with	CAV1 (interacts with) ILK
265007	89.57020598	interacts with	FANCD2 (interacts with) TERF1	FALSE	interacts with	FANCD2 (interacts with) TERF1
265009	123.1550634	interacts with	FANCD2 (interacts with) HTATIP	FALSE	interacts with	FANCD2 (interacts with) HTATIP
265010	93.56946089	interacts with	FANCD2 (interacts with) TNFRSF1B	FALSE	interacts with	FANCD2 (interacts with) TNFRSF1B
265019	194.0286895	interacts with	FANCD2 (interacts with) FSCN1	FALSE	interacts with	FANCD2 (interacts with) FSCN1
265020	69.07658221	interacts with	FANCD2 (interacts with) RAD18	FALSE	interacts with	FANCD2 (interacts with) RAD18
248632	164.9996841	interacts with	CAV1 (interacts with) TNF	FALSE	interacts with	CAV1 (interacts with) TNF
265016	71.59831395	interacts with	FANCD2 (interacts with) FOXO3A	FALSE	interacts with	FANCD2 (interacts with) FOXO3A
215874	1085.397172	interacts with	CCDC85B (interacts with) ZFC3H1	FALSE	interacts with	CCDC85B (interacts with) ZFC3H1
248640	234.3321093	interacts with	CAV1 (interacts with) TRAF2	FALSE	interacts with	CAV1 (interacts with) TRAF2
248639	180.6198727	interacts with	CAV1 (interacts with) NOS3	FALSE	interacts with	CAV1 (interacts with) NOS3
265023	148.229713	interacts with	FANCD2 (interacts with) RPS27A	FALSE	interacts with	FANCD2 (interacts with) RPS27A
265024	102.7305018	interacts with	FANCD2 (interacts with) UBA52	FALSE	interacts with	FANCD2 (interacts with) UBA52
248643	66.84204292	interacts with	CAV1 (interacts with) PTEN	FALSE	interacts with	CAV1 (interacts with) PTEN
248648	332.4669302	interacts with	CAV1 (interacts with) ID1	FALSE	interacts with	CAV1 (interacts with) ID1
248651	207.5416896	interacts with	CAV1 (interacts with) EGFR	FALSE	interacts with	CAV1 (interacts with) EGFR
248657	170.4064205	interacts with	CAV1 (interacts with) SRC	FALSE	interacts with	CAV1 (interacts with) SRC
232282	654.4577223	interacts with	RXRB (interacts with) VCP	FALSE	interacts with	RXRB (interacts with) VCP
232281	612.5316472	interacts with	RXRB (interacts with) VDR	FALSE	interacts with	RXRB (interacts with) VDR
215954	646.5120227	interacts with	MARS (interacts with) UBC	FALSE	interacts with	MARS (interacts with) UBC
215957	126.7718494	interacts with	MARS (interacts with) MYC	FALSE	interacts with	MARS (interacts with) MYC
215956	144.7418952	interacts with	MARS (interacts with) MDM2	FALSE	interacts with	MARS (interacts with) MDM2
215955	192.6750801	interacts with	MARS (interacts with) TRAF6	FALSE	interacts with	MARS (interacts with) TRAF6
215960	71.43973877	interacts with	MARS (interacts with) NFKB2	FALSE	interacts with	MARS (interacts with) NFKB2
215974	569.2490105	interacts with	PSMA3 (interacts with) UBC	FALSE	interacts with	PSMA3 (interacts with) UBC
215978	127.8197816	interacts with	PSMA3 (interacts with) UCHL5	FALSE	interacts with	PSMA3 (interacts with) UCHL5
215977	71.05191747	interacts with	PSMA3 (interacts with) PSMD4	FALSE	interacts with	PSMA3 (interacts with) PSMD4
215976	304.1090804	interacts with	PSMA3 (interacts with) STUB1	FALSE	interacts with	PSMA3 (interacts with) STUB1
215975	179.0043348	interacts with	PSMA3 (interacts with) TRAF6	FALSE	interacts with	PSMA3 (interacts with) TRAF6
215981	80.93316736	interacts with	PSMA3 (interacts with) p44S10	FALSE	interacts with	PSMA3 (interacts with) p44S10
215979	188.7978944	interacts with	PSMA3 (interacts with) TNFRSF14	FALSE	interacts with	PSMA3 (interacts with) TNFRSF14
215986	107.1486028	interacts with	PSMA3 (interacts with) PSMB5	FALSE	interacts with	PSMA3 (interacts with) PSMB5
215983	40.03384984	interacts with	PSMA3 (interacts with) PSMD13	FALSE	interacts with	PSMA3 (interacts with) PSMD13
215987	93.8417039	interacts with	PSMA3 (interacts with) PSMD14	FALSE	interacts with	PSMA3 (interacts with) PSMD14
215994	55.20462373	interacts with	PSMA3 (interacts with) PSMA4	FALSE	interacts with	PSMA3 (interacts with) PSMA4
215992	53.09374211	interacts with	PSMA3 (interacts with) PSMA6	FALSE	interacts with	PSMA3 (interacts with) PSMA6
232382	193.5208897	interacts with	ASCC1 (interacts with) NCOA6	FALSE	interacts with	ASCC1 (interacts with) NCOA6
232381	684.8590568	interacts with	ASCC1 (interacts with) RELA	FALSE	interacts with	ASCC1 (interacts with) RELA
232380	823.076732	interacts with	ASCC1 (interacts with) JUN	FALSE	interacts with	ASCC1 (interacts with) JUN
232385	11.19158112	interacts with	ASCC1 (interacts with) ASCC3	FALSE	interacts with	ASCC1 (interacts with) ASCC3
232383	135.8492987	interacts with	ASCC1 (interacts with) SRF	FALSE	interacts with	ASCC1 (interacts with) SRF
232394	126.0963829	interacts with	NCOA6 (interacts with) RB1	FALSE	interacts with	NCOA6 (interacts with) RB1
232393	129.7150579	interacts with	NCOA6 (interacts with) SMAD3	FALSE	interacts with	NCOA6 (interacts with) SMAD3
248776	186.1893454	interacts with	SYNCRIP (interacts with) SYT1	FALSE	interacts with	SYNCRIP (interacts with) SYT1
232392	151.4408452	interacts with	NCOA6 (interacts with) SMAD2	FALSE	interacts with	NCOA6 (interacts with) SMAD2
248775	2144.042666	interacts with	SYNCRIP (interacts with) UBC	FALSE	interacts with	SYNCRIP (interacts with) UBC
232396	140.5967754	interacts with	NCOA6 (interacts with) NFKB1	FALSE	interacts with	NCOA6 (interacts with) NFKB1
232395	80.24657244	interacts with	NCOA6 (interacts with) RELA	FALSE	interacts with	NCOA6 (interacts with) RELA
281555	249.0767469	interacts with	ITGAV (interacts with) TGFB1	FALSE	interacts with	ITGAV (interacts with) TGFB1
232401	152.2285692	interacts with	NCOA6 (interacts with) TUBB	FALSE	interacts with	NCOA6 (interacts with) TUBB
232400	80.93568992	interacts with	NCOA6 (interacts with) VDR	FALSE	interacts with	NCOA6 (interacts with) VDR
232399	108.6372264	interacts with	NCOA6 (interacts with) PARP1	FALSE	interacts with	NCOA6 (interacts with) PARP1
281552	136.2903405	interacts with	ITGB6 (interacts with) TGFB1	FALSE	interacts with	ITGB6 (interacts with) TGFB1
281553	265.4093267	interacts with	ITGB6 (interacts with) VTN	FALSE	interacts with	ITGB6 (interacts with) VTN
232403	52.22569265	interacts with	NCOA6 (interacts with) SRF	FALSE	interacts with	NCOA6 (interacts with) SRF
232410	110.2841323	interacts with	NCOA6 (interacts with) NR3C1	FALSE	interacts with	NCOA6 (interacts with) NR3C1
216025	389.3461475	interacts with	HSF1 (interacts with) STUB1	FALSE	interacts with	HSF1 (interacts with) STUB1
216024	83.96189503	interacts with	HSF1 (interacts with) NCOA6	FALSE	interacts with	HSF1 (interacts with) NCOA6
216023	151.3376711	interacts with	HSF1 (interacts with) PRKDC	FALSE	interacts with	HSF1 (interacts with) PRKDC
281559	507.814776	interacts with	ITGAV (interacts with) VTN	FALSE	interacts with	ITGAV (interacts with) VTN
232414	124.8686716	interacts with	NCOA6 (interacts with) PRKDC	FALSE	interacts with	NCOA6 (interacts with) PRKDC
281572	106.6594302	interacts with	ITGAV (interacts with) ITGB8	FALSE	interacts with	ITGAV (interacts with) ITGB8
281573	192.4496996	interacts with	ITGAV (interacts with) ITGB5	FALSE	interacts with	ITGAV (interacts with) ITGB5
281574	328.7599137	interacts with	ITGAV (interacts with) ITGB3	FALSE	interacts with	ITGAV (interacts with) ITGB3
216031	77.39665392	interacts with	HSF1 (interacts with) MTA1	FALSE	interacts with	HSF1 (interacts with) MTA1
216038	261.762989	interacts with	HSF1 (interacts with) HSPCA	FALSE	interacts with	HSF1 (interacts with) HSPCA
216037	207.5281957	interacts with	HSF1 (interacts with) TAF7	FALSE	interacts with	HSF1 (interacts with) TAF7
232420	180.164742	interacts with	NCOA6 (interacts with) SRC	FALSE	interacts with	NCOA6 (interacts with) SRC
216035	167.3125073	interacts with	HSF1 (interacts with) RALBP1	FALSE	interacts with	HSF1 (interacts with) RALBP1
216041	196.8588473	interacts with	HSF1 (interacts with) HSPA8	FALSE	interacts with	HSF1 (interacts with) HSPA8
216040	112.1441997	interacts with	HSF1 (interacts with) MAPK3	FALSE	interacts with	HSF1 (interacts with) MAPK3
281575	79.91688496	interacts with	ITGAV (interacts with) ITGB6	FALSE	interacts with	ITGAV (interacts with) ITGB6
232428	88.13736017	interacts with	NCOA6 (interacts with) WDR5	FALSE	interacts with	NCOA6 (interacts with) WDR5
216043	173.3077197	interacts with	HSF1 (interacts with) HSPA4	FALSE	interacts with	HSF1 (interacts with) HSPA4
216047	88.29002535	interacts with	HSF1 (interacts with) TAF9	FALSE	interacts with	HSF1 (interacts with) TAF9
216054	117.1843496	interacts with	HSF1 (interacts with) HSPA1A	FALSE	interacts with	HSF1 (interacts with) HSPA1A
216052	111.210709	interacts with	HSF1 (interacts with) SUMO1	FALSE	interacts with	HSF1 (interacts with) SUMO1
199689	927.7150923	interacts with	DYX1C1 (interacts with) STUB1	FALSE	interacts with	DYX1C1 (interacts with) STUB1
199691	916.2849077	interacts with	DYX1C1 (interacts with) HSPA1A	FALSE	interacts with	DYX1C1 (interacts with) HSPA1A
281660	1287.756671	interacts with	NKD2 (interacts with) UBC	FALSE	interacts with	NKD2 (interacts with) UBC
281661	243.4214253	interacts with	NKD2 (interacts with) UBB	FALSE	interacts with	NKD2 (interacts with) UBB
281662	175.2522084	interacts with	NKD2 (interacts with) RPS27A	FALSE	interacts with	NKD2 (interacts with) RPS27A
281663	137.5696954	interacts with	NKD2 (interacts with) UBA52	FALSE	interacts with	NKD2 (interacts with) UBA52
232526	244.9066369	interacts with	GM632 (interacts with) SMAD1	FALSE	interacts with	GM632 (interacts with) SMAD1
199762	235.87433	interacts with	ATP5O (interacts with) TRAF6	FALSE	interacts with	ATP5O (interacts with) TRAF6
248914	440.5106719	interacts with	CPE (interacts with) RPA1	FALSE	interacts with	CPE (interacts with) RPA1
199761	905.7012762	interacts with	ATP5O (interacts with) UBC	FALSE	interacts with	ATP5O (interacts with) UBC
248912	657.6232465	interacts with	CPE (interacts with) RIF1	FALSE	interacts with	CPE (interacts with) RIF1
232528	291.04629	interacts with	GM632 (interacts with) PIAS4	FALSE	interacts with	GM632 (interacts with) PIAS4
232527	611.253972	interacts with	GM632 (interacts with) RPS27A	FALSE	interacts with	GM632 (interacts with) RPS27A
199764	165.8178999	interacts with	ATP5O (interacts with) IKBKE	FALSE	interacts with	ATP5O (interacts with) IKBKE
199763	697.1969601	interacts with	ATP5O (interacts with) IKBKG	FALSE	interacts with	ATP5O (interacts with) IKBKG
232531	181.4021563	interacts with	GM632 (interacts with) SUPT5H	FALSE	interacts with	GM632 (interacts with) SUPT5H
232538	237.7626877	interacts with	GM632 (interacts with) MYH10	FALSE	interacts with	GM632 (interacts with) MYH10
248919	823.5111671	interacts with	CPE (interacts with) PMCH	FALSE	interacts with	CPE (interacts with) PMCH
232539	139.2713953	interacts with	GM632 (interacts with) PPP1R15A	FALSE	interacts with	GM632 (interacts with) PPP1R15A
199771	172.2722904	interacts with	ATP5O (interacts with) MPG	FALSE	interacts with	ATP5O (interacts with) MPG
216162	233.0031508	interacts with	MAGEA6 (interacts with) XPO5	FALSE	interacts with	MAGEA6 (interacts with) XPO5
248930	168.6573589	interacts with	ITK (interacts with) SRC	FALSE	interacts with	ITK (interacts with) SRC
265315	49.78893906	interacts with	TIMM50 (interacts with) TNFRSF1A	FALSE	interacts with	TIMM50 (interacts with) TNFRSF1A
265316	46.15313307	interacts with	TIMM50 (interacts with) TNFRSF1B	FALSE	interacts with	TIMM50 (interacts with) TNFRSF1B
248933	222.7593535	interacts with	ITK (interacts with) KPNA2	FALSE	interacts with	ITK (interacts with) KPNA2
232549	119.4217546	interacts with	GM632 (interacts with) HEYL	FALSE	interacts with	GM632 (interacts with) HEYL
265313	607.8776713	interacts with	TIMM50 (interacts with) UBC	FALSE	interacts with	TIMM50 (interacts with) UBC
216164	193.9621986	interacts with	MAGEA6 (interacts with) PPM1B	FALSE	interacts with	MAGEA6 (interacts with) PPM1B
248932	268.8236614	interacts with	ITK (interacts with) TGFBR1	FALSE	interacts with	ITK (interacts with) TGFBR1
265314	137.308966	interacts with	TIMM50 (interacts with) YWHAZ	FALSE	interacts with	TIMM50 (interacts with) YWHAZ
248931	184.3842195	interacts with	ITK (interacts with) SMAD4	FALSE	interacts with	ITK (interacts with) SMAD4
248938	75.84774743	interacts with	ITK (interacts with) LCK	FALSE	interacts with	ITK (interacts with) LCK
248943	78.78259813	interacts with	ITK (interacts with) KHDRBS1	FALSE	interacts with	ITK (interacts with) KHDRBS1
232614	160.1997553	interacts with	EEF1A2 (interacts with) NFKB1	FALSE	interacts with	EEF1A2 (interacts with) NFKB1
232613	139.8944094	interacts with	EEF1A2 (interacts with) TRAF2	FALSE	interacts with	EEF1A2 (interacts with) TRAF2
232612	609.3264279	interacts with	EEF1A2 (interacts with) IKBKG	FALSE	interacts with	EEF1A2 (interacts with) IKBKG
232611	280.4928229	interacts with	EEF1A2 (interacts with) TRAF6	FALSE	interacts with	EEF1A2 (interacts with) TRAF6
232618	83.3942797	interacts with	EEF1A2 (interacts with) TNFRSF1B	FALSE	interacts with	EEF1A2 (interacts with) TNFRSF1B
232617	92.96812804	interacts with	EEF1A2 (interacts with) NFKB2	FALSE	interacts with	EEF1A2 (interacts with) NFKB2
232616	137.8959173	interacts with	EEF1A2 (interacts with) PPP2R2B	FALSE	interacts with	EEF1A2 (interacts with) PPP2R2B
232615	225.9075942	interacts with	EEF1A2 (interacts with) MAP3K3	FALSE	interacts with	EEF1A2 (interacts with) MAP3K3
232623	112.3235591	interacts with	EEF1A2 (interacts with) EEF1D	FALSE	interacts with	EEF1A2 (interacts with) EEF1D
232627	35.61847405	interacts with	EEF1A2 (interacts with) VARS2	FALSE	interacts with	EEF1A2 (interacts with) VARS2
281797	471.9617857	interacts with	MAFG (interacts with) VIM	FALSE	interacts with	MAFG (interacts with) VIM
232643	1346.081875	interacts with	ID3 (interacts with) IKBKG	FALSE	interacts with	ID3 (interacts with) IKBKG
281804	163.5379394	interacts with	MAFG (interacts with) NFE2L2	FALSE	interacts with	MAFG (interacts with) NFE2L2
281805	179.2453999	interacts with	MAFG (interacts with) NFE2	FALSE	interacts with	MAFG (interacts with) NFE2
232647	256.6812567	interacts with	ID3 (interacts with) SIAHBP1	FALSE	interacts with	ID3 (interacts with) SIAHBP1
281811	198.768894	interacts with	FSHR (interacts with) RPS27A	FALSE	interacts with	FSHR (interacts with) RPS27A
281812	154.8652502	interacts with	FSHR (interacts with) UBA52	FALSE	interacts with	FSHR (interacts with) UBA52
281807	1279.540738	interacts with	FSHR (interacts with) UBC	FALSE	interacts with	FSHR (interacts with) UBC
216278	203.1745568	interacts with	SET (interacts with) YWHAZ	FALSE	interacts with	SET (interacts with) YWHAZ
281810	216.3856075	interacts with	FSHR (interacts with) UBB	FALSE	interacts with	FSHR (interacts with) UBB
281819	642.483979	interacts with	CABP1 (interacts with) FOS	FALSE	interacts with	CABP1 (interacts with) FOS
232664	243.0422439	interacts with	ID3 (interacts with) TCF3	FALSE	interacts with	ID3 (interacts with) TCF3
216279	265.7723434	interacts with	SET (interacts with) TRAF6	FALSE	interacts with	SET (interacts with) TRAF6
281816	187.1877391	interacts with	FSHR (interacts with) GRK4	FALSE	interacts with	FSHR (interacts with) GRK4
216284	288.283567	interacts with	SET (interacts with) WDR48	FALSE	interacts with	SET (interacts with) WDR48
281818	1085.65119	interacts with	CABP1 (interacts with) SP1	FALSE	interacts with	CABP1 (interacts with) SP1
216283	79.13938745	interacts with	SET (interacts with) XPO1	FALSE	interacts with	SET (interacts with) XPO1
281824	176.9769323	interacts with	CABP1 (interacts with) NMT1	FALSE	interacts with	CABP1 (interacts with) NMT1
216291	136.8915747	interacts with	SET (interacts with) TREX1	FALSE	interacts with	SET (interacts with) TREX1
281860	1219.211533	interacts with	DAZAP2 (interacts with) UBC	FALSE	interacts with	DAZAP2 (interacts with) UBC
281862	91.22116666	interacts with	DAZAP2 (interacts with) SMURF2	FALSE	interacts with	DAZAP2 (interacts with) SMURF2
232708	1580.306831	interacts with	SPRED1 (interacts with) UBC	FALSE	interacts with	SPRED1 (interacts with) UBC
281865	226.2265648	interacts with	DAZAP2 (interacts with) UBB	FALSE	interacts with	DAZAP2 (interacts with) UBB
281866	207.2363128	interacts with	DAZAP2 (interacts with) RPS27A	FALSE	interacts with	DAZAP2 (interacts with) RPS27A
281871	167.5829332	interacts with	DAZAP2 (interacts with) ZFYVE9	FALSE	interacts with	DAZAP2 (interacts with) ZFYVE9
281873	99.25933108	interacts with	DAZAP2 (interacts with) WWP1	FALSE	interacts with	DAZAP2 (interacts with) WWP1
281881	173.9474799	interacts with	DAZAP2 (interacts with) UBADC1	FALSE	interacts with	DAZAP2 (interacts with) UBADC1
216366	119.79673	interacts with	CNTN2 (interacts with) SUMO2	FALSE	interacts with	CNTN2 (interacts with) SUMO2
216364	93.616921	interacts with	CNTN2 (interacts with) SUMO1	FALSE	interacts with	CNTN2 (interacts with) SUMO1
216363	151.4983206	interacts with	CNTN2 (interacts with) EGFR	FALSE	interacts with	CNTN2 (interacts with) EGFR
216369	66.25941427	interacts with	CNTN2 (interacts with) UBE2N	FALSE	interacts with	CNTN2 (interacts with) UBE2N
216368	45.88187002	interacts with	CNTN2 (interacts with) MAP3K7	FALSE	interacts with	CNTN2 (interacts with) MAP3K7
216372	195.972437	interacts with	CNTN2 (interacts with) HDAC1	FALSE	interacts with	CNTN2 (interacts with) HDAC1
216371	39.33176461	interacts with	CNTN2 (interacts with) TUBG1	FALSE	interacts with	CNTN2 (interacts with) TUBG1
216377	113.1175156	interacts with	CNTN2 (interacts with) IKBKB	FALSE	interacts with	CNTN2 (interacts with) IKBKB
216376	598.4250041	interacts with	CNTN2 (interacts with) UBC	FALSE	interacts with	CNTN2 (interacts with) UBC
281914	473.8335007	interacts with	HGF (interacts with) VTN	FALSE	interacts with	HGF (interacts with) VTN
216379	543.8321367	interacts with	CNTN2 (interacts with) IKBKG	FALSE	interacts with	CNTN2 (interacts with) IKBKG
281925	1438.586511	interacts with	HGF (interacts with) MET	FALSE	interacts with	HGF (interacts with) MET
281934	188.7313378	interacts with	CDK2 (interacts with) SMAD2	FALSE	interacts with	CDK2 (interacts with) SMAD2
200014	256.5500784	interacts with	DDX3X (interacts with) ESR1	FALSE	interacts with	DDX3X (interacts with) ESR1
200013	206.5121646	interacts with	DDX3X (interacts with) YWHAZ	FALSE	interacts with	DDX3X (interacts with) YWHAZ
281939	171.4458861	interacts with	CDK2 (interacts with) PCNA	FALSE	interacts with	CDK2 (interacts with) PCNA
200018	132.795558	interacts with	DDX3X (interacts with) TERF2	FALSE	interacts with	DDX3X (interacts with) TERF2
281940	126.3476613	interacts with	CDK2 (interacts with) PPP2CA	FALSE	interacts with	CDK2 (interacts with) PPP2CA
200017	192.6848772	interacts with	DDX3X (interacts with) IKBKE	FALSE	interacts with	DDX3X (interacts with) IKBKE
200016	798.5859712	interacts with	DDX3X (interacts with) IKBKG	FALSE	interacts with	DDX3X (interacts with) IKBKG
200015	287.1431978	interacts with	DDX3X (interacts with) TRAF6	FALSE	interacts with	DDX3X (interacts with) TRAF6
281942	242.4294676	interacts with	CDK2 (interacts with) PABPC1	FALSE	interacts with	CDK2 (interacts with) PABPC1
281935	201.4275795	interacts with	CDK2 (interacts with) SMAD3	FALSE	interacts with	CDK2 (interacts with) SMAD3
281936	2186.957156	interacts with	CDK2 (interacts with) IKBKG	FALSE	interacts with	CDK2 (interacts with) IKBKG
200021	100.7651806	interacts with	DDX3X (interacts with) MAP3K14	FALSE	interacts with	DDX3X (interacts with) MAP3K14
200020	105.386814	interacts with	DDX3X (interacts with) PPP2R2B	FALSE	interacts with	DDX3X (interacts with) PPP2R2B
200019	155.5264293	interacts with	DDX3X (interacts with) SUMO2	FALSE	interacts with	DDX3X (interacts with) SUMO2
281938	174.8073365	interacts with	CDK2 (interacts with) SP1	FALSE	interacts with	CDK2 (interacts with) SP1
281947	141.7926701	interacts with	CDK2 (interacts with) TP73	FALSE	interacts with	CDK2 (interacts with) TP73
200024	91.61413418	interacts with	DDX3X (interacts with) NFKB2	FALSE	interacts with	DDX3X (interacts with) NFKB2
200030	163.5760005	interacts with	DDX3X (interacts with) ILK	FALSE	interacts with	DDX3X (interacts with) ILK
281945	1261.137646	interacts with	CDK2 (interacts with) PPP1CA	FALSE	interacts with	CDK2 (interacts with) PPP1CA
200028	61.92968346	interacts with	DDX3X (interacts with) XPO1	FALSE	interacts with	DDX3X (interacts with) XPO1
216418	241.6627797	interacts with	ATP5I (interacts with) EIF2C4	FALSE	interacts with	ATP5I (interacts with) EIF2C4
216417	204.7945492	interacts with	ATP5I (interacts with) TAF9	FALSE	interacts with	ATP5I (interacts with) TAF9
216416	429.1639229	interacts with	ATP5I (interacts with) FOS	FALSE	interacts with	ATP5I (interacts with) FOS
216415	855.1954907	interacts with	ATP5I (interacts with) SMAD2	FALSE	interacts with	ATP5I (interacts with) SMAD2
281958	214.5348955	interacts with	CDK2 (interacts with) PRKAR1A	FALSE	interacts with	CDK2 (interacts with) PRKAR1A
216420	65.80032995	interacts with	ATP5I (interacts with) NR2F6	FALSE	interacts with	ATP5I (interacts with) NR2F6
200036	262.7131178	interacts with	DDX3X (interacts with) GM632	FALSE	interacts with	DDX3X (interacts with) GM632
216419	89.41625735	interacts with	ATP5I (interacts with) RXRB	FALSE	interacts with	ATP5I (interacts with) RXRB
200041	227.3471867	interacts with	DDX3X (interacts with) SIAHBP1	FALSE	interacts with	DDX3X (interacts with) SIAHBP1
281961	384.612172	interacts with	CDK2 (interacts with) TP53	FALSE	interacts with	CDK2 (interacts with) TP53
281962	168.2012487	interacts with	CDK2 (interacts with) ORC1L	FALSE	interacts with	CDK2 (interacts with) ORC1L
281967	326.9289462	interacts with	CDK2 (interacts with) ID2	FALSE	interacts with	CDK2 (interacts with) ID2
281968	437.605001	interacts with	CDK2 (interacts with) FEN1	FALSE	interacts with	CDK2 (interacts with) FEN1
281969	292.8350008	interacts with	CDK2 (interacts with) ID3	FALSE	interacts with	CDK2 (interacts with) ID3
281982	160.7927783	interacts with	CDK2 (interacts with) LYN	FALSE	interacts with	CDK2 (interacts with) LYN
281976	103.6277372	interacts with	CDK2 (interacts with) CNTN2	FALSE	interacts with	CDK2 (interacts with) CNTN2
281978	314.0511112	interacts with	CDK2 (interacts with) UBE2A	FALSE	interacts with	CDK2 (interacts with) UBE2A
281988	151.7487733	interacts with	CDK2 (interacts with) CNOT7	FALSE	interacts with	CDK2 (interacts with) CNOT7
281990	193.8089439	interacts with	CDK2 (interacts with) PPM1B	FALSE	interacts with	CDK2 (interacts with) PPM1B
249222	210.9599588	interacts with	ID2 (interacts with) SIN3A	FALSE	interacts with	ID2 (interacts with) SIN3A
249221	271.5044337	interacts with	ID2 (interacts with) MAPK1	FALSE	interacts with	ID2 (interacts with) MAPK1
249220	174.7787537	interacts with	ID2 (interacts with) RB1	FALSE	interacts with	ID2 (interacts with) RB1
281986	106.7163153	interacts with	CDK2 (interacts with) RPS16	FALSE	interacts with	CDK2 (interacts with) RPS16
232842	135.0389745	interacts with	JAK3 (interacts with) LCK	FALSE	interacts with	JAK3 (interacts with) LCK
249225	144.5041031	interacts with	ID2 (interacts with) RIF1	FALSE	interacts with	ID2 (interacts with) RIF1
232841	277.7022551	interacts with	JAK3 (interacts with) STAT3	FALSE	interacts with	JAK3 (interacts with) STAT3
249224	554.1514748	interacts with	ID2 (interacts with) PPP1CA	FALSE	interacts with	ID2 (interacts with) PPP1CA
249223	114.6472004	interacts with	ID2 (interacts with) MAPK3	FALSE	interacts with	ID2 (interacts with) MAPK3
232844	134.4811488	interacts with	JAK3 (interacts with) KHDRBS1	FALSE	interacts with	JAK3 (interacts with) KHDRBS1
249227	153.1765193	interacts with	ID2 (interacts with) UNC119	FALSE	interacts with	ID2 (interacts with) UNC119
232848	164.4188581	interacts with	JAK3 (interacts with) PTPRC	FALSE	interacts with	JAK3 (interacts with) PTPRC
249238	191.7933123	interacts with	ID2 (interacts with) RBL2	FALSE	interacts with	ID2 (interacts with) RBL2
249240	138.7658389	interacts with	ID2 (interacts with) TCF3	FALSE	interacts with	ID2 (interacts with) TCF3
232862	336.8621805	interacts with	SMAD3 (interacts with) TP53	FALSE	interacts with	SMAD3 (interacts with) TP53
282007	209.7064278	interacts with	CDK2 (interacts with) FOXM1	FALSE	interacts with	CDK2 (interacts with) FOXM1
249246	360.289296	interacts with	PSMD2 (interacts with) RIF1	FALSE	interacts with	PSMD2 (interacts with) RIF1
232861	193.2386645	interacts with	JAK3 (interacts with) STAM	FALSE	interacts with	JAK3 (interacts with) STAM
249244	789.8524996	interacts with	PSMD2 (interacts with) UBC	FALSE	interacts with	PSMD2 (interacts with) UBC
249243	304.7941532	interacts with	PSMD2 (interacts with) YWHAZ	FALSE	interacts with	PSMD2 (interacts with) YWHAZ
232866	647.5724335	interacts with	SMAD3 (interacts with) VIM	FALSE	interacts with	SMAD3 (interacts with) VIM
249250	47.08789833	interacts with	PSMD2 (interacts with) p44S10	FALSE	interacts with	PSMD2 (interacts with) p44S10
249249	64.60543034	interacts with	PSMD2 (interacts with) PSMD4	FALSE	interacts with	PSMD2 (interacts with) PSMD4
249248	231.1513977	interacts with	PSMD2 (interacts with) UNC119	FALSE	interacts with	PSMD2 (interacts with) UNC119
232863	302.1557718	interacts with	SMAD3 (interacts with) SRC	FALSE	interacts with	SMAD3 (interacts with) SRC
249247	271.3246743	interacts with	PSMD2 (interacts with) PTN	FALSE	interacts with	PSMD2 (interacts with) PTN
232870	491.181062	interacts with	SMAD3 (interacts with) STUB1	FALSE	interacts with	SMAD3 (interacts with) STUB1
232869	252.5550873	interacts with	SMAD3 (interacts with) USP7	FALSE	interacts with	SMAD3 (interacts with) USP7
282016	121.0366116	interacts with	CDK2 (interacts with) RBL2	FALSE	interacts with	CDK2 (interacts with) RBL2
249253	82.61843953	interacts with	PSMD2 (interacts with) PSMD7	FALSE	interacts with	PSMD2 (interacts with) PSMD7
249251	290.4995342	interacts with	PSMD2 (interacts with) TRAF6	FALSE	interacts with	PSMD2 (interacts with) TRAF6
232867	124.3371499	interacts with	SMAD3 (interacts with) SQSTM1	FALSE	interacts with	SMAD3 (interacts with) SQSTM1
249257	207.3472545	interacts with	PSMD2 (interacts with) TNFRSF1A	FALSE	interacts with	PSMD2 (interacts with) TNFRSF1A
232872	125.0164165	interacts with	SMAD3 (interacts with) TP73	FALSE	interacts with	SMAD3 (interacts with) TP73
249255	51.43391675	interacts with	PSMD2 (interacts with) USP14	FALSE	interacts with	PSMD2 (interacts with) USP14
249262	1242.539253	interacts with	PSMC1 (interacts with) UBC	FALSE	interacts with	PSMC1 (interacts with) UBC
249261	178.7462077	interacts with	PSMD2 (interacts with) PSMD5	FALSE	interacts with	PSMD2 (interacts with) PSMD5
232875	317.4608132	interacts with	SMAD3 (interacts with) UCHL5	FALSE	interacts with	SMAD3 (interacts with) UCHL5
249259	74.5147672	interacts with	PSMD2 (interacts with) UCHL5	FALSE	interacts with	PSMD2 (interacts with) UCHL5
249266	53.91105099	interacts with	PSMC1 (interacts with) PSMD4	FALSE	interacts with	PSMC1 (interacts with) PSMD4
232881	241.3431151	interacts with	SMAD3 (interacts with) TGFBR1	FALSE	interacts with	SMAD3 (interacts with) TGFBR1
282037	214.499988	interacts with	CDK2 (interacts with) CDKN1A	FALSE	interacts with	CDK2 (interacts with) CDKN1A
249264	156.9332731	interacts with	PSMC1 (interacts with) VCP	FALSE	interacts with	PSMC1 (interacts with) VCP
232879	178.1093286	interacts with	SMAD3 (interacts with) TGFBR2	FALSE	interacts with	SMAD3 (interacts with) TGFBR2
249270	69.24772509	interacts with	PSMC1 (interacts with) PSMD13	FALSE	interacts with	PSMC1 (interacts with) PSMD13
232886	177.0482783	interacts with	SMAD3 (interacts with) WWP1	FALSE	interacts with	SMAD3 (interacts with) WWP1
282032	99.9847773	interacts with	CDK2 (interacts with) RB1	FALSE	interacts with	CDK2 (interacts with) RB1
232884	380.412792	interacts with	SMAD3 (interacts with) TPM3	FALSE	interacts with	SMAD3 (interacts with) TPM3
249268	402.8300071	interacts with	PSMC1 (interacts with) TRAF6	FALSE	interacts with	PSMC1 (interacts with) TRAF6
249267	23.66584874	interacts with	PSMC1 (interacts with) p44S10	FALSE	interacts with	PSMC1 (interacts with) p44S10
249274	29.63574728	interacts with	PSMC1 (interacts with) USP14	FALSE	interacts with	PSMC1 (interacts with) USP14
249273	13.12885993	interacts with	PSMC1 (interacts with) PSMD14	FALSE	interacts with	PSMC1 (interacts with) PSMD14
249272	8.00911654	interacts with	PSMC1 (interacts with) PSMC6	FALSE	interacts with	PSMC1 (interacts with) PSMC6
249271	25.48917366	interacts with	PSMC1 (interacts with) PSMD1	FALSE	interacts with	PSMC1 (interacts with) PSMD1
249278	18.02398752	interacts with	PSMC1 (interacts with) PSMC4	FALSE	interacts with	PSMC1 (interacts with) PSMC4
249277	44.19424236	interacts with	PSMC1 (interacts with) PSMD10	FALSE	interacts with	PSMC1 (interacts with) PSMD10
249276	56.72894787	interacts with	PSMC1 (interacts with) UCHL5	FALSE	interacts with	PSMC1 (interacts with) UCHL5
249275	68.00372316	interacts with	PSMC1 (interacts with) PSMC5	FALSE	interacts with	PSMC1 (interacts with) PSMC5
232898	380.7068282	interacts with	SMAD3 (interacts with) ZBTB3	FALSE	interacts with	SMAD3 (interacts with) ZBTB3
249282	57.48194895	interacts with	PSMC1 (interacts with) PSMD2	FALSE	interacts with	PSMC1 (interacts with) PSMD2
249281	27.46501976	interacts with	PSMC1 (interacts with) PSMC2	FALSE	interacts with	PSMC1 (interacts with) PSMC2
249280	61.83438614	interacts with	PSMC1 (interacts with) PSMD5	FALSE	interacts with	PSMC1 (interacts with) PSMD5
232896	155.7961764	interacts with	SMAD3 (interacts with) VDR	FALSE	interacts with	SMAD3 (interacts with) VDR
249279	92.31332142	interacts with	PSMC1 (interacts with) PSMD7	FALSE	interacts with	PSMC1 (interacts with) PSMD7
200134	329.1409622	interacts with	HSPCAL3 (interacts with) MAP3K3	FALSE	interacts with	HSPCAL3 (interacts with) MAP3K3
200133	293.9760384	interacts with	HSPCAL3 (interacts with) IKBKE	FALSE	interacts with	HSPCAL3 (interacts with) IKBKE
200132	886.3558183	interacts with	HSPCAL3 (interacts with) IKBKG	FALSE	interacts with	HSPCAL3 (interacts with) IKBKG
232899	117.2086606	interacts with	SMAD3 (interacts with) SP1	FALSE	interacts with	SMAD3 (interacts with) SP1
200136	101.5148978	interacts with	HSPCAL3 (interacts with) TBK1	FALSE	interacts with	HSPCAL3 (interacts with) TBK1
200135	225.8260174	interacts with	HSPCAL3 (interacts with) RUVBL2	FALSE	interacts with	HSPCAL3 (interacts with) RUVBL2
249294	403.5365958	interacts with	HSP90AB1 (interacts with) TP53	FALSE	interacts with	HSP90AB1 (interacts with) TP53
232907	888.8595614	interacts with	SMAD3 (interacts with) UBC	FALSE	interacts with	SMAD3 (interacts with) UBC
249298	106.6288115	interacts with	HSP90AB1 (interacts with) STAT3	FALSE	interacts with	HSP90AB1 (interacts with) STAT3
249296	159.82689	interacts with	HSP90AB1 (interacts with) IKBKE	FALSE	interacts with	HSP90AB1 (interacts with) IKBKE
232911	108.619212	interacts with	SMAD3 (interacts with) SMURF1	FALSE	interacts with	SMAD3 (interacts with) SMURF1
249295	530.4039087	interacts with	HSP90AB1 (interacts with) IKBKG	FALSE	interacts with	HSP90AB1 (interacts with) IKBKG
249302	45.13297601	interacts with	HSP90AB1 (interacts with) TBK1	FALSE	interacts with	HSP90AB1 (interacts with) TBK1
249301	77.10782821	interacts with	HSP90AB1 (interacts with) MAP3K14	FALSE	interacts with	HSP90AB1 (interacts with) MAP3K14
249300	143.5317744	interacts with	HSP90AB1 (interacts with) MAP3K3	FALSE	interacts with	HSP90AB1 (interacts with) MAP3K3
249299	101.5215334	interacts with	HSP90AB1 (interacts with) IKBKB	FALSE	interacts with	HSP90AB1 (interacts with) IKBKB
265693	781.07744	interacts with	CDKN1A (interacts with) TP53	FALSE	interacts with	CDKN1A (interacts with) TP53
265699	568.4922631	interacts with	CDKN1A (interacts with) CSNK2A1	FALSE	interacts with	CDKN1A (interacts with) CSNK2A1
265700	252.3927826	interacts with	CDKN1A (interacts with) STAT3	FALSE	interacts with	CDKN1A (interacts with) STAT3
265701	394.9411213	interacts with	CDKN1A (interacts with) HDAC1	FALSE	interacts with	CDKN1A (interacts with) HDAC1
265695	240.2900602	interacts with	CDKN1A (interacts with) MDM2	FALSE	interacts with	CDKN1A (interacts with) MDM2
232934	327.2914341	interacts with	SMAD3 (interacts with) ZFYVE9	FALSE	interacts with	SMAD3 (interacts with) ZFYVE9
265696	212.0773075	interacts with	CDKN1A (interacts with) RB1	FALSE	interacts with	CDKN1A (interacts with) RB1
265697	295.0494177	interacts with	CDKN1A (interacts with) HDAC2	FALSE	interacts with	CDKN1A (interacts with) HDAC2
232932	179.9462654	interacts with	SMAD3 (interacts with) SMURF2	FALSE	interacts with	SMAD3 (interacts with) SMURF2
265698	253.6315485	interacts with	CDKN1A (interacts with) JUN	FALSE	interacts with	CDKN1A (interacts with) JUN
265707	447.3753705	interacts with	CDKN1A (interacts with) ESR1	FALSE	interacts with	CDKN1A (interacts with) ESR1
232935	80.51739739	interacts with	SMAD3 (interacts with) SMAD4	FALSE	interacts with	SMAD3 (interacts with) SMAD4
265703	171.67037	interacts with	CDKN1A (interacts with) SKP1A	FALSE	interacts with	CDKN1A (interacts with) SKP1A
265704	169.8446202	interacts with	CDKN1A (interacts with) MCM7	FALSE	interacts with	CDKN1A (interacts with) MCM7
265706	265.5352328	interacts with	CDKN1A (interacts with) CREBBP	FALSE	interacts with	CDKN1A (interacts with) CREBBP
265711	275.7648487	interacts with	CDKN1A (interacts with) GNB2L1	FALSE	interacts with	CDKN1A (interacts with) GNB2L1
249334	1846.364755	interacts with	LSM1 (interacts with) SMN1	FALSE	interacts with	LSM1 (interacts with) SMN1
265712	262.9842498	interacts with	CDKN1A (interacts with) MAP3K5	FALSE	interacts with	CDKN1A (interacts with) MAP3K5
265723	383.5914491	interacts with	CDKN1A (interacts with) MCM10	FALSE	interacts with	CDKN1A (interacts with) MCM10
249338	287.1495926	interacts with	LSM1 (interacts with) LSM7	FALSE	interacts with	LSM1 (interacts with) LSM7
265724	327.0734911	interacts with	CDKN1A (interacts with) GMNN	FALSE	interacts with	CDKN1A (interacts with) GMNN
249337	1198.908672	interacts with	LSM1 (interacts with) PSMB5	FALSE	interacts with	LSM1 (interacts with) PSMB5
265725	4390.359175	interacts with	CDKN1A (interacts with) RAB1A	FALSE	interacts with	CDKN1A (interacts with) RAB1A
249336	349.4410559	interacts with	LSM1 (interacts with) UPF2	FALSE	interacts with	LSM1 (interacts with) UPF2
249335	542.5578648	interacts with	LSM1 (interacts with) PTPRC	FALSE	interacts with	LSM1 (interacts with) PTPRC
200190	1248.275255	interacts with	PCMT1 (interacts with) UBC	FALSE	interacts with	PCMT1 (interacts with) UBC
249342	539.9853235	interacts with	LSM1 (interacts with) N4BP1	FALSE	interacts with	LSM1 (interacts with) N4BP1
265720	154.3920062	interacts with	CDKN1A (interacts with) PSMD2	FALSE	interacts with	CDKN1A (interacts with) PSMD2
249341	333.1406018	interacts with	LSM1 (interacts with) LSM5	FALSE	interacts with	LSM1 (interacts with) LSM5
249340	627.3586482	interacts with	LSM1 (interacts with) UXT	FALSE	interacts with	LSM1 (interacts with) UXT
265722	155.183816	interacts with	CDKN1A (interacts with) PSMA3	FALSE	interacts with	CDKN1A (interacts with) PSMA3
249339	444.2727869	interacts with	LSM1 (interacts with) VPS11	FALSE	interacts with	LSM1 (interacts with) VPS11
282115	604.8266977	interacts with	RAF1 (interacts with) UBC	FALSE	interacts with	RAF1 (interacts with) UBC
249346	221.9525858	interacts with	LSM1 (interacts with) LSM3	FALSE	interacts with	LSM1 (interacts with) LSM3
249345	1844	interacts with	LSM1 (interacts with) PSMB8	FALSE	interacts with	LSM1 (interacts with) PSMB8
200193	104.67533	interacts with	PCMT1 (interacts with) TERF1	FALSE	interacts with	PCMT1 (interacts with) TERF1
200192	99.7516859	interacts with	PCMT1 (interacts with) TERF2	FALSE	interacts with	PCMT1 (interacts with) TERF2
282117	125.9401514	interacts with	RAF1 (interacts with) UBE2D2	FALSE	interacts with	RAF1 (interacts with) UBE2D2
249344	334.4122156	interacts with	LSM1 (interacts with) LSM2	FALSE	interacts with	LSM1 (interacts with) LSM2
249343	661.9586707	interacts with	LSM1 (interacts with) NARS	FALSE	interacts with	LSM1 (interacts with) NARS
282118	329.7588783	interacts with	RAF1 (interacts with) STUB1	FALSE	interacts with	RAF1 (interacts with) STUB1
249349	300.4951502	interacts with	LSM1 (interacts with) LSM6	FALSE	interacts with	LSM1 (interacts with) LSM6
265730	196.92437	interacts with	CDKN1A (interacts with) DDB1	FALSE	interacts with	CDKN1A (interacts with) DDB1
249347	302.7754219	interacts with	LSM1 (interacts with) LSM4	FALSE	interacts with	LSM1 (interacts with) LSM4
282124	90.59231919	interacts with	RAF1 (interacts with) TIMM50	FALSE	interacts with	RAF1 (interacts with) TIMM50
249353	1844	interacts with	LSM1 (interacts with) TMEM214	FALSE	interacts with	LSM1 (interacts with) TMEM214
265742	198.8608154	interacts with	CDKN1A (interacts with) PARP1	FALSE	interacts with	CDKN1A (interacts with) PARP1
249351	1844	interacts with	LSM1 (interacts with) NDUFAF3	FALSE	interacts with	LSM1 (interacts with) NDUFAF3
282120	131.5031082	interacts with	RAF1 (interacts with) RBL2	FALSE	interacts with	RAF1 (interacts with) RBL2
265737	1724.817303	interacts with	CDKN1A (interacts with) UBC	FALSE	interacts with	CDKN1A (interacts with) UBC
265738	169.9153107	interacts with	CDKN1A (interacts with) SET	FALSE	interacts with	CDKN1A (interacts with) SET
282122	104.246449	interacts with	RAF1 (interacts with) SPRY2	FALSE	interacts with	RAF1 (interacts with) SPRY2
249355	1844	interacts with	LSM1 (interacts with) RRP1B	FALSE	interacts with	LSM1 (interacts with) RRP1B
282131	207.9511431	interacts with	RAF1 (interacts with) YWHAG	FALSE	interacts with	RAF1 (interacts with) YWHAG
265744	182.5084815	interacts with	CDKN1A (interacts with) GADD45G	FALSE	interacts with	CDKN1A (interacts with) GADD45G
282130	132.4199298	interacts with	RAF1 (interacts with) SRC	FALSE	interacts with	RAF1 (interacts with) SRC
265755	313.7006564	interacts with	CDKN1A (interacts with) PCNA	FALSE	interacts with	CDKN1A (interacts with) PCNA
282140	332.3751113	interacts with	RAF1 (interacts with) RRAS	FALSE	interacts with	RAF1 (interacts with) RRAS
200221	213.0859741	interacts with	RPS10 (interacts with) TRAF6	FALSE	interacts with	RPS10 (interacts with) TRAF6
200220	712.0571528	interacts with	RPS10 (interacts with) UBC	FALSE	interacts with	RPS10 (interacts with) UBC
282138	136.4566652	interacts with	RAF1 (interacts with) RB1	FALSE	interacts with	RAF1 (interacts with) RB1
249378	407.889488	interacts with	PCSK7 (interacts with) SYNCRIP	FALSE	interacts with	PCSK7 (interacts with) SYNCRIP
282147	495.9516691	interacts with	HRAS (interacts with) SRC	FALSE	interacts with	HRAS (interacts with) SRC
200224	1606.325826	interacts with	CENTA2 (interacts with) IKBKG	FALSE	interacts with	CENTA2 (interacts with) IKBKG
282150	312.6057314	interacts with	HRAS (interacts with) TP73	FALSE	interacts with	HRAS (interacts with) TP73
282143	144.0419375	interacts with	RAF1 (interacts with) YWHAZ	FALSE	interacts with	RAF1 (interacts with) YWHAZ
249381	809.6782336	interacts with	GEM (interacts with) VTN	FALSE	interacts with	GEM (interacts with) VTN
249379	1054.174147	interacts with	PCSK7 (interacts with) PMCH	FALSE	interacts with	PCSK7 (interacts with) PMCH
200227	344.7115533	interacts with	CENTA2 (interacts with) EEF1G	FALSE	interacts with	CENTA2 (interacts with) EEF1G
282156	317.543869	interacts with	HRAS (interacts with) RABAC1	FALSE	interacts with	HRAS (interacts with) RABAC1
249383	1293.587427	interacts with	GEM (interacts with) RNF7	FALSE	interacts with	GEM (interacts with) RNF7
282152	322.288911	interacts with	HRAS (interacts with) IRAK1	FALSE	interacts with	HRAS (interacts with) IRAK1
282179	217.6065253	interacts with	HRAS (interacts with) IKZF3	FALSE	interacts with	HRAS (interacts with) IKZF3
249413	352.1319763	interacts with	UBE2I (interacts with) UNC119	FALSE	interacts with	UBE2I (interacts with) UNC119
282177	124.0393579	interacts with	HRAS (interacts with) RAP1B	FALSE	interacts with	HRAS (interacts with) RAP1B
282187	121.4469765	interacts with	HRAS (interacts with) RALA	FALSE	interacts with	HRAS (interacts with) RALA
233038	647.0341026	interacts with	SLC25A5 (interacts with) UBC	FALSE	interacts with	SLC25A5 (interacts with) UBC
233042	51.25290953	interacts with	SLC25A5 (interacts with) TNFRSF1B	FALSE	interacts with	SLC25A5 (interacts with) TNFRSF1B
233041	56.04461871	interacts with	SLC25A5 (interacts with) TNFRSF1A	FALSE	interacts with	SLC25A5 (interacts with) TNFRSF1A
233040	91.29199089	interacts with	SLC25A5 (interacts with) TRAF2	FALSE	interacts with	SLC25A5 (interacts with) TRAF2
233039	150.3930989	interacts with	SLC25A5 (interacts with) SMAD2	FALSE	interacts with	SLC25A5 (interacts with) SMAD2
282198	166.9919844	interacts with	HRAS (interacts with) RGL2	FALSE	interacts with	HRAS (interacts with) RGL2
249429	215.2895218	interacts with	SMARCB1 (interacts with) SRC	FALSE	interacts with	SMARCB1 (interacts with) SRC
249428	314.2605185	interacts with	SMARCB1 (interacts with) TP53	FALSE	interacts with	SMARCB1 (interacts with) TP53
249432	96.78334064	interacts with	SMARCB1 (interacts with) TAF6	FALSE	interacts with	SMARCB1 (interacts with) TAF6
249431	129.8106767	interacts with	SMARCB1 (interacts with) XPO1	FALSE	interacts with	SMARCB1 (interacts with) XPO1
282206	343.8830309	interacts with	HRAS (interacts with) RAF1	FALSE	interacts with	HRAS (interacts with) RAF1
265860	619.9214297	interacts with	MAST2 (interacts with) TRAF6	FALSE	interacts with	MAST2 (interacts with) TRAF6
265861	432.3682139	interacts with	MAST2 (interacts with) TRAF2	FALSE	interacts with	MAST2 (interacts with) TRAF2
265862	420.4108312	interacts with	MAST2 (interacts with) RPS27A	FALSE	interacts with	MAST2 (interacts with) RPS27A
265863	265.7091088	interacts with	MAST2 (interacts with) PTEN	FALSE	interacts with	MAST2 (interacts with) PTEN
216722	136.0165347	interacts with	FOXM1 (interacts with) ZBTB3	FALSE	interacts with	FOXM1 (interacts with) ZBTB3
216721	86.45032872	interacts with	FOXM1 (interacts with) FOXO3A	FALSE	interacts with	FOXM1 (interacts with) FOXO3A
216720	234.2446256	interacts with	FOXM1 (interacts with) STAT3	FALSE	interacts with	FOXM1 (interacts with) STAT3
216719	193.8914495	interacts with	FOXM1 (interacts with) RB1	FALSE	interacts with	FOXM1 (interacts with) RB1
233110	66.71115701	interacts with	SMURF1 (interacts with) SQSTM1	FALSE	interacts with	SMURF1 (interacts with) SQSTM1
233109	59.1181558	interacts with	SMURF1 (interacts with) SMURF2	FALSE	interacts with	SMURF1 (interacts with) SMURF2
233107	607.2461553	interacts with	SMURF1 (interacts with) UBC	FALSE	interacts with	SMURF1 (interacts with) UBC
233114	81.89907659	interacts with	SMURF1 (interacts with) UBA52	FALSE	interacts with	SMURF1 (interacts with) UBA52
233113	82.0835077	interacts with	SMURF1 (interacts with) XPO1	FALSE	interacts with	SMURF1 (interacts with) XPO1
233112	98.13655989	interacts with	SMURF1 (interacts with) UBB	FALSE	interacts with	SMURF1 (interacts with) UBB
233111	158.787862	interacts with	SMURF1 (interacts with) STUB1	FALSE	interacts with	SMURF1 (interacts with) STUB1
233118	96.4936518	interacts with	SMURF1 (interacts with) TGFBR1	FALSE	interacts with	SMURF1 (interacts with) TGFBR1
233115	77.64825884	interacts with	SMURF1 (interacts with) TGFBR2	FALSE	interacts with	SMURF1 (interacts with) TGFBR2
200358	721.0668415	interacts with	CCAR1 (interacts with) UBC	FALSE	interacts with	CCAR1 (interacts with) UBC
200361	711.7097341	interacts with	CCAR1 (interacts with) IKBKG	FALSE	interacts with	CCAR1 (interacts with) IKBKG
200360	137.8474083	interacts with	CCAR1 (interacts with) MDM2	FALSE	interacts with	CCAR1 (interacts with) MDM2
200359	453.2121702	interacts with	CCAR1 (interacts with) TP53	FALSE	interacts with	CCAR1 (interacts with) TP53
200366	121.2410803	interacts with	CCAR1 (interacts with) EEF1D	FALSE	interacts with	CCAR1 (interacts with) EEF1D
200365	161.5525617	interacts with	CCAR1 (interacts with) SF3A2	FALSE	interacts with	CCAR1 (interacts with) SF3A2
200364	85.90381938	interacts with	CCAR1 (interacts with) SMURF2	FALSE	interacts with	CCAR1 (interacts with) SMURF2
282299	3344.999978	interacts with	POLH (interacts with) UBC	FALSE	interacts with	POLH (interacts with) UBC
282300	789.7682914	interacts with	POLH (interacts with) TUBB	FALSE	interacts with	POLH (interacts with) TUBB
282301	593.0073936	interacts with	POLH (interacts with) RPS27A	FALSE	interacts with	POLH (interacts with) RPS27A
200381	37.88905533	interacts with	CCAR1 (interacts with) HNRPU	FALSE	interacts with	CCAR1 (interacts with) HNRPU
200379	122.5243667	interacts with	CCAR1 (interacts with) HNRPA1	FALSE	interacts with	CCAR1 (interacts with) HNRPA1
282303	49.38283742	interacts with	POLH (interacts with) RAD18	FALSE	interacts with	POLH (interacts with) RAD18
282304	1697.130356	interacts with	POLH (interacts with) REV1	FALSE	interacts with	POLH (interacts with) REV1
282305	1697.130356	interacts with	POLH (interacts with) REV1L	FALSE	interacts with	POLH (interacts with) REV1L
265939	59.01609916	interacts with	TNFRSF1A (interacts with) TUBB4	FALSE	interacts with	TNFRSF1A (interacts with) TUBB4
265941	61.08562766	interacts with	TNFRSF1A (interacts with) TUBA2	FALSE	interacts with	TNFRSF1A (interacts with) TUBA2
200406	115.3645883	interacts with	CCAR1 (interacts with) DNAJC8	FALSE	interacts with	CCAR1 (interacts with) DNAJC8
265936	610.1135117	interacts with	TNFRSF1A (interacts with) UBC	FALSE	interacts with	TNFRSF1A (interacts with) UBC
265937	350.6788395	interacts with	TNFRSF1A (interacts with) UBE2I	FALSE	interacts with	TNFRSF1A (interacts with) UBE2I
265938	70.16971167	interacts with	TNFRSF1A (interacts with) TUBB	FALSE	interacts with	TNFRSF1A (interacts with) TUBB
282331	1145.074337	interacts with	DDB1 (interacts with) IKBKG	FALSE	interacts with	DDB1 (interacts with) IKBKG
282332	211.6348628	interacts with	DDB1 (interacts with) PCNA	FALSE	interacts with	DDB1 (interacts with) PCNA
265948	76.50704563	interacts with	TNFRSF1A (interacts with) TRAF2	FALSE	interacts with	TNFRSF1A (interacts with) TRAF2
282333	147.1578117	interacts with	DDB1 (interacts with) TERF2	FALSE	interacts with	DDB1 (interacts with) TERF2
282328	762.862513	interacts with	DDB1 (interacts with) UBC	FALSE	interacts with	DDB1 (interacts with) UBC
265945	152.8755979	interacts with	TNFRSF1A (interacts with) TRPC4AP	FALSE	interacts with	TNFRSF1A (interacts with) TRPC4AP
282329	175.8649728	interacts with	DDB1 (interacts with) YWHAZ	FALSE	interacts with	DDB1 (interacts with) YWHAZ
265946	425.249529	interacts with	TNFRSF1A (interacts with) TNFRSF25	FALSE	interacts with	TNFRSF1A (interacts with) TNFRSF25
282330	256.3319072	interacts with	DDB1 (interacts with) TRAF6	FALSE	interacts with	DDB1 (interacts with) TRAF6
282339	92.45823852	interacts with	DDB1 (interacts with) TNFRSF1B	FALSE	interacts with	DDB1 (interacts with) TNFRSF1B
282335	214.8262758	interacts with	DDB1 (interacts with) HIST1H3A	FALSE	interacts with	DDB1 (interacts with) HIST1H3A
282336	178.7690438	interacts with	DDB1 (interacts with) MAP3K3	FALSE	interacts with	DDB1 (interacts with) MAP3K3
282337	136.4184906	interacts with	DDB1 (interacts with) TERF1	FALSE	interacts with	DDB1 (interacts with) TERF1
282344	221.918631	interacts with	DDB1 (interacts with) ILK	FALSE	interacts with	DDB1 (interacts with) ILK
200428	397.3630457	interacts with	PDCL (interacts with) PSMC5	FALSE	interacts with	PDCL (interacts with) PSMC5
265971	588.3644049	interacts with	COPS3 (interacts with) UBC	FALSE	interacts with	COPS3 (interacts with) UBC
265972	378.2667223	interacts with	COPS3 (interacts with) TP53	FALSE	interacts with	COPS3 (interacts with) TP53
265973	588.8581185	interacts with	COPS3 (interacts with) IKBKG	FALSE	interacts with	COPS3 (interacts with) IKBKG
265974	156.2824727	interacts with	COPS3 (interacts with) HSPCA	FALSE	interacts with	COPS3 (interacts with) HSPCA
282351	410.7602755	interacts with	DDB1 (interacts with) EED	FALSE	interacts with	DDB1 (interacts with) EED
200438	124.5551426	interacts with	CAPZA1 (interacts with) IKBKE	FALSE	interacts with	CAPZA1 (interacts with) IKBKE
200437	579.430154	interacts with	CAPZA1 (interacts with) IKBKG	FALSE	interacts with	CAPZA1 (interacts with) IKBKG
200436	182.0595694	interacts with	CAPZA1 (interacts with) TRAF6	FALSE	interacts with	CAPZA1 (interacts with) TRAF6
200435	686.3014207	interacts with	CAPZA1 (interacts with) UBC	FALSE	interacts with	CAPZA1 (interacts with) UBC
200442	120.5062046	interacts with	CAPZA1 (interacts with) CHUK	FALSE	interacts with	CAPZA1 (interacts with) CHUK
282359	203.690803	interacts with	DDB1 (interacts with) VAMP3	FALSE	interacts with	DDB1 (interacts with) VAMP3
265975	88.86358368	interacts with	COPS3 (interacts with) RAF1	FALSE	interacts with	COPS3 (interacts with) RAF1
265976	84.99966918	interacts with	COPS3 (interacts with) CUL1	FALSE	interacts with	COPS3 (interacts with) CUL1
282361	555.3240144	interacts with	DDB1 (interacts with) INO80	FALSE	interacts with	DDB1 (interacts with) INO80
200444	93.70661414	interacts with	CAPZA1 (interacts with) PPP2R2B	FALSE	interacts with	CAPZA1 (interacts with) PPP2R2B
200443	200.1202619	interacts with	CAPZA1 (interacts with) MAP3K3	FALSE	interacts with	CAPZA1 (interacts with) MAP3K3
265988	43.0970516	interacts with	COPS3 (interacts with) DDB1	FALSE	interacts with	COPS3 (interacts with) DDB1
265989	104.8116388	interacts with	COPS3 (interacts with) COPS5	FALSE	interacts with	COPS3 (interacts with) COPS5
282382	125.9765527	interacts with	DDB1 (interacts with) TRPC4AP	FALSE	interacts with	DDB1 (interacts with) TRPC4AP
200455	212.9888304	interacts with	CAPZA1 (interacts with) MPG	FALSE	interacts with	CAPZA1 (interacts with) MPG
282375	94.24910734	interacts with	DDB1 (interacts with) RFWD2	FALSE	interacts with	DDB1 (interacts with) RFWD2
233238	574.4847699	interacts with	KPNA2 (interacts with) TP53	FALSE	interacts with	KPNA2 (interacts with) TP53
233237	1617.894887	interacts with	KPNA2 (interacts with) UBC	FALSE	interacts with	KPNA2 (interacts with) UBC
233240	234.7212987	interacts with	KPNA2 (interacts with) NR3C1	FALSE	interacts with	KPNA2 (interacts with) NR3C1
233239	219.3070081	interacts with	KPNA2 (interacts with) RELA	FALSE	interacts with	KPNA2 (interacts with) RELA
233245	161.7657918	interacts with	KPNA2 (interacts with) MLH1	FALSE	interacts with	KPNA2 (interacts with) MLH1
233244	140.791439	interacts with	KPNA2 (interacts with) TERF1	FALSE	interacts with	KPNA2 (interacts with) TERF1
233243	150.8846442	interacts with	KPNA2 (interacts with) TERF2	FALSE	interacts with	KPNA2 (interacts with) TERF2
233247	248.952607	interacts with	KPNA2 (interacts with) NFKBIB	FALSE	interacts with	KPNA2 (interacts with) NFKBIB
282406	1505.756594	interacts with	SERPINE1 (interacts with) VTN	FALSE	interacts with	SERPINE1 (interacts with) VTN
233251	170.8281164	interacts with	KPNA2 (interacts with) SGK	FALSE	interacts with	KPNA2 (interacts with) SGK
266028	113.8111503	interacts with	TERF2 (interacts with) WDR5	FALSE	interacts with	TERF2 (interacts with) WDR5
233265	291.785348	interacts with	KPNA2 (interacts with) PRKD3	FALSE	interacts with	KPNA2 (interacts with) PRKD3
266031	239.2922197	interacts with	TERF2 (interacts with) USP15	FALSE	interacts with	TERF2 (interacts with) USP15
233279	91.42500782	interacts with	KPNA2 (interacts with) KPNB1	FALSE	interacts with	KPNA2 (interacts with) KPNB1
216914	1391.504421	interacts with	ANTXR2 (interacts with) UBC	FALSE	interacts with	ANTXR2 (interacts with) UBC
216918	151.9517756	interacts with	ANTXR2 (interacts with) UBA52	FALSE	interacts with	ANTXR2 (interacts with) UBA52
216917	204.8012188	interacts with	ANTXR2 (interacts with) RPS27A	FALSE	interacts with	ANTXR2 (interacts with) RPS27A
216916	267.4110958	interacts with	ANTXR2 (interacts with) UBB	FALSE	interacts with	ANTXR2 (interacts with) UBB
216915	298.1895002	interacts with	ANTXR2 (interacts with) SMAD2	FALSE	interacts with	ANTXR2 (interacts with) SMAD2
200538	383.1724237	interacts with	IKBKE (interacts with) RELA	FALSE	interacts with	IKBKE (interacts with) RELA
216922	501.4576196	interacts with	ANTXR2 (interacts with) COL4A3	FALSE	interacts with	ANTXR2 (interacts with) COL4A3
200537	302.129226	interacts with	IKBKE (interacts with) TRAF2	FALSE	interacts with	IKBKE (interacts with) TRAF2
200536	1133.884568	interacts with	IKBKE (interacts with) UBC	FALSE	interacts with	IKBKE (interacts with) UBC
216920	13.65554084	interacts with	ANTXR2 (interacts with) LRP6	FALSE	interacts with	ANTXR2 (interacts with) LRP6
200541	253.7596829	interacts with	IKBKE (interacts with) NFKBIA	FALSE	interacts with	IKBKE (interacts with) NFKBIA
200540	599.7142076	interacts with	IKBKE (interacts with) UBE2I	FALSE	interacts with	IKBKE (interacts with) UBE2I
200539	531.0790531	interacts with	IKBKE (interacts with) PCNA	FALSE	interacts with	IKBKE (interacts with) PCNA
200546	193.3598268	interacts with	IKBKE (interacts with) PARP1	FALSE	interacts with	IKBKE (interacts with) PARP1
200549	335.0020107	interacts with	IKBKE (interacts with) RUVBL2	FALSE	interacts with	IKBKE (interacts with) RUVBL2
200548	292.3900581	interacts with	IKBKE (interacts with) PABPC1	FALSE	interacts with	IKBKE (interacts with) PABPC1
200552	170.9266099	interacts with	IKBKE (interacts with) TUBB	FALSE	interacts with	IKBKE (interacts with) TUBB
200558	134.5010549	interacts with	IKBKE (interacts with) TUBB4	FALSE	interacts with	IKBKE (interacts with) TUBB4
200555	230.028865	interacts with	IKBKE (interacts with) VCP	FALSE	interacts with	IKBKE (interacts with) VCP
200561	235.3876288	interacts with	IKBKE (interacts with) TRIM28	FALSE	interacts with	IKBKE (interacts with) TRIM28
200559	153.0779942	interacts with	IKBKE (interacts with) UBE2N	FALSE	interacts with	IKBKE (interacts with) UBE2N
200564	113.737825	interacts with	IKBKE (interacts with) TBK1	FALSE	interacts with	IKBKE (interacts with) TBK1
200570	212.9604432	interacts with	IKBKE (interacts with) SET	FALSE	interacts with	IKBKE (interacts with) SET
200575	224.6938658	interacts with	IKBKE (interacts with) p44S10	FALSE	interacts with	IKBKE (interacts with) p44S10
200593	210.032774	interacts with	IKBKE (interacts with) PSMD2	FALSE	interacts with	IKBKE (interacts with) PSMD2
200591	185.8252651	interacts with	IKBKE (interacts with) PSMC2	FALSE	interacts with	IKBKE (interacts with) PSMC2
200595	193.1929812	interacts with	IKBKE (interacts with) PSMC4	FALSE	interacts with	IKBKE (interacts with) PSMC4
282524	120.7180663	interacts with	EED (interacts with) HIST1H3A	FALSE	interacts with	EED (interacts with) HIST1H3A
266142	1068.314906	interacts with	RELA (interacts with) UBC	FALSE	interacts with	RELA (interacts with) UBC
200599	482.617449	interacts with	IKBKE (interacts with) SYNCRIP	FALSE	interacts with	IKBKE (interacts with) SYNCRIP
282526	508.5746702	interacts with	EED (interacts with) PPP1CA	FALSE	interacts with	EED (interacts with) PPP1CA
249757	1944.001101	interacts with	RTN3 (interacts with) UBC	FALSE	interacts with	RTN3 (interacts with) UBC
200605	253.1339917	interacts with	IKBKE (interacts with) KIF5B	FALSE	interacts with	IKBKE (interacts with) KIF5B
282521	425.5694503	interacts with	EED (interacts with) HDAC1	FALSE	interacts with	EED (interacts with) HDAC1
200603	181.7423772	interacts with	IKBKE (interacts with) MYH9	FALSE	interacts with	IKBKE (interacts with) MYH9
282522	277.4925749	interacts with	EED (interacts with) HDAC2	FALSE	interacts with	EED (interacts with) HDAC2
266147	181.2995203	interacts with	RELA (interacts with) SRF	FALSE	interacts with	RELA (interacts with) SRF
200609	547.177246	interacts with	IKBKE (interacts with) PSMD7	FALSE	interacts with	IKBKE (interacts with) PSMD7
200607	103.9763988	interacts with	IKBKE (interacts with) RPS3A	FALSE	interacts with	IKBKE (interacts with) RPS3A
249759	105.423477	interacts with	RTN3 (interacts with) RTN4	FALSE	interacts with	RTN3 (interacts with) RTN4
282527	167.5093397	interacts with	EED (interacts with) USP7	FALSE	interacts with	EED (interacts with) USP7
266143	129.1050487	interacts with	RELA (interacts with) SIN3A	FALSE	interacts with	RELA (interacts with) SIN3A
266146	161.349166	interacts with	RELA (interacts with) TAF9	FALSE	interacts with	RELA (interacts with) TAF9
200611	155.4983106	interacts with	IKBKE (interacts with) PSMA6	FALSE	interacts with	IKBKE (interacts with) PSMA6
282540	62.62791366	interacts with	EED (interacts with) PPP1R8	FALSE	interacts with	EED (interacts with) PPP1R8
266157	236.3740654	interacts with	RELA (interacts with) TP53BP2	FALSE	interacts with	RELA (interacts with) TP53BP2
266152	220.805351	interacts with	RELA (interacts with) TAF6	FALSE	interacts with	RELA (interacts with) TAF6
200621	258.0321767	interacts with	IKBKE (interacts with) PSMC6	FALSE	interacts with	IKBKE (interacts with) PSMC6
266153	131.2366593	interacts with	RELA (interacts with) STAT3	FALSE	interacts with	RELA (interacts with) STAT3
200619	173.3699654	interacts with	IKBKE (interacts with) PSMD1	FALSE	interacts with	IKBKE (interacts with) PSMD1
266164	94.96461229	interacts with	RELA (interacts with) RPS3	FALSE	interacts with	RELA (interacts with) RPS3
266165	293.2932658	interacts with	RELA (interacts with) TNIP2	FALSE	interacts with	RELA (interacts with) TNIP2
266173	466.172311	interacts with	RELA (interacts with) SIRT6	FALSE	interacts with	RELA (interacts with) SIRT6
200631	245.0073371	interacts with	IKBKE (interacts with) PA2G4	FALSE	interacts with	IKBKE (interacts with) PA2G4
266168	379.260068	interacts with	RELA (interacts with) UXT	FALSE	interacts with	RELA (interacts with) UXT
200635	654.8382515	interacts with	IKBKE (interacts with) Kua-UEV	FALSE	interacts with	IKBKE (interacts with) Kua-UEV
266179	85.42799396	interacts with	RELA (interacts with) SP1	FALSE	interacts with	RELA (interacts with) SP1
200641	329.4612504	interacts with	IKBKE (interacts with) UBA2	FALSE	interacts with	IKBKE (interacts with) UBA2
200639	130.6947358	interacts with	IKBKE (interacts with) LRPPRC	FALSE	interacts with	IKBKE (interacts with) LRPPRC
200644	307.7179836	interacts with	IKBKE (interacts with) UBE2V1	FALSE	interacts with	IKBKE (interacts with) UBE2V1
266178	125.4442401	interacts with	RELA (interacts with) TBK1	FALSE	interacts with	RELA (interacts with) TBK1
200643	535.3683089	interacts with	IKBKE (interacts with) RBM8A	FALSE	interacts with	IKBKE (interacts with) RBM8A
266187	195.1703461	interacts with	NFKBIA (interacts with) SUMO1	FALSE	interacts with	NFKBIA (interacts with) SUMO1
266188	145.4806645	interacts with	NFKBIA (interacts with) UBE2D1	FALSE	interacts with	NFKBIA (interacts with) UBE2D1
200648	202.1298646	interacts with	IKBKE (interacts with) PSMD14	FALSE	interacts with	IKBKE (interacts with) PSMD14
266189	159.2642987	interacts with	NFKBIA (interacts with) UBE2D2	FALSE	interacts with	NFKBIA (interacts with) UBE2D2
266190	81.35909052	interacts with	NFKBIA (interacts with) TUBB	FALSE	interacts with	NFKBIA (interacts with) TUBB
200654	449.089679	interacts with	IKBKE (interacts with) VAMP3	FALSE	interacts with	IKBKE (interacts with) VAMP3
266185	422.3832621	interacts with	NFKBIA (interacts with) TP53	FALSE	interacts with	NFKBIA (interacts with) TP53
266197	246.8773283	interacts with	NFKBIA (interacts with) SUMO4	FALSE	interacts with	NFKBIA (interacts with) SUMO4
200655	137.5231706	interacts with	IKBKE (interacts with) TUBA2	FALSE	interacts with	IKBKE (interacts with) TUBA2
266191	104.8868806	interacts with	NFKBIA (interacts with) UBE2D3	FALSE	interacts with	NFKBIA (interacts with) UBE2D3
266192	75.54645455	interacts with	NFKBIA (interacts with) TUBB4	FALSE	interacts with	NFKBIA (interacts with) TUBB4
266193	104.9550545	interacts with	NFKBIA (interacts with) TUBA3	FALSE	interacts with	NFKBIA (interacts with) TUBA3
266194	110.8211135	interacts with	NFKBIA (interacts with) NFKBIB	FALSE	interacts with	NFKBIA (interacts with) NFKBIB
266204	100.9243013	interacts with	NFKBIA (interacts with) TUBA2	FALSE	interacts with	NFKBIA (interacts with) TUBA2
200665	142.0421548	interacts with	IKBKE (interacts with) MYO6	FALSE	interacts with	IKBKE (interacts with) MYO6
266205	72.51588914	interacts with	NFKBIA (interacts with) RPL23	FALSE	interacts with	NFKBIA (interacts with) RPL23
266206	72.27956525	interacts with	NFKBIA (interacts with) RPS3	FALSE	interacts with	NFKBIA (interacts with) RPS3
266199	647.7768954	interacts with	NFKBIA (interacts with) SKP1	FALSE	interacts with	NFKBIA (interacts with) SKP1
266200	129.1250985	interacts with	NFKBIA (interacts with) STK6	FALSE	interacts with	NFKBIA (interacts with) STK6
266201	238.690056	interacts with	NFKBIA (interacts with) SRC	FALSE	interacts with	NFKBIA (interacts with) SRC
266202	79.5711232	interacts with	NFKBIA (interacts with) TIMM50	FALSE	interacts with	NFKBIA (interacts with) TIMM50
266211	146.5789127	interacts with	NFKBIA (interacts with) UBB	FALSE	interacts with	NFKBIA (interacts with) UBB
282597	860.2759699	interacts with	TP53 (interacts with) YWHAG	FALSE	interacts with	TP53 (interacts with) YWHAG
266213	136.6542448	interacts with	NFKBIA (interacts with) VCP	FALSE	interacts with	NFKBIA (interacts with) VCP
266214	362.9778264	interacts with	NFKBIA (interacts with) RPS27A	FALSE	interacts with	NFKBIA (interacts with) RPS27A
266208	1039.273791	interacts with	NFKBIA (interacts with) POM121	FALSE	interacts with	NFKBIA (interacts with) POM121
233450	145.72008	interacts with	CALM1 (interacts with) SMAD2	FALSE	interacts with	CALM1 (interacts with) SMAD2
233449	233.7669267	interacts with	CALM1 (interacts with) TRAF6	FALSE	interacts with	CALM1 (interacts with) TRAF6
249833	656.2675901	interacts with	PSMA6 (interacts with) UBC	FALSE	interacts with	PSMA6 (interacts with) UBC
249832	207.1351764	interacts with	PSMA6 (interacts with) TRAF6	FALSE	interacts with	PSMA6 (interacts with) TRAF6
282605	1060.307366	interacts with	TP53 (interacts with) WDR48	FALSE	interacts with	TP53 (interacts with) WDR48
233448	146.825058	interacts with	CALM1 (interacts with) ESR1	FALSE	interacts with	CALM1 (interacts with) ESR1
282606	482.7279692	interacts with	TP53 (interacts with) ZHX1	FALSE	interacts with	TP53 (interacts with) ZHX1
233447	141.730667	interacts with	CALM1 (interacts with) YWHAZ	FALSE	interacts with	CALM1 (interacts with) YWHAZ
200679	201.9390732	interacts with	IKBKE (interacts with) PSMD12	FALSE	interacts with	IKBKE (interacts with) PSMD12
249838	95.78617495	interacts with	PSMA6 (interacts with) UBA52	FALSE	interacts with	PSMA6 (interacts with) UBA52
233454	133.1688574	interacts with	CALM1 (interacts with) RELA	FALSE	interacts with	CALM1 (interacts with) RELA
282599	604.5708998	interacts with	TP53 (interacts with) YWHAZ	FALSE	interacts with	TP53 (interacts with) YWHAZ
266216	224.2248485	interacts with	NFKBIA (interacts with) UBA52	FALSE	interacts with	NFKBIA (interacts with) UBA52
249837	134.1472884	interacts with	PSMA6 (interacts with) RPS27A	FALSE	interacts with	PSMA6 (interacts with) RPS27A
282600	366.0797704	interacts with	TP53 (interacts with) VDR	FALSE	interacts with	TP53 (interacts with) VDR
233453	111.566176	interacts with	CALM1 (interacts with) TRAF2	FALSE	interacts with	CALM1 (interacts with) TRAF2
200685	213.8973458	interacts with	IKBKE (interacts with) TPT1	FALSE	interacts with	IKBKE (interacts with) TPT1
282602	310.1727964	interacts with	TP53 (interacts with) WDR5	FALSE	interacts with	TP53 (interacts with) WDR5
249835	114.3746543	interacts with	PSMA6 (interacts with) UBB	FALSE	interacts with	PSMA6 (interacts with) UBB
233451	885.5964068	interacts with	CALM1 (interacts with) IKBKG	FALSE	interacts with	CALM1 (interacts with) IKBKG
266218	116.3877126	interacts with	NFKBIA (interacts with) RPS27L	FALSE	interacts with	NFKBIA (interacts with) RPS27L
282611	243.3472459	interacts with	TP53 (interacts with) TP73	FALSE	interacts with	TP53 (interacts with) TP73
249842	74.61979273	interacts with	PSMA6 (interacts with) SGK	FALSE	interacts with	PSMA6 (interacts with) SGK
266227	69.97257939	interacts with	NFKBIA (interacts with) TBK1	FALSE	interacts with	NFKBIA (interacts with) TBK1
200689	176.9952496	interacts with	IKBKE (interacts with) XPO5	FALSE	interacts with	IKBKE (interacts with) XPO5
266228	313.3085404	interacts with	NFKBIA (interacts with) UBE2E3	FALSE	interacts with	NFKBIA (interacts with) UBE2E3
233457	144.9949247	interacts with	CALM1 (interacts with) H2AFX	FALSE	interacts with	CALM1 (interacts with) H2AFX
249841	24.13642886	interacts with	PSMA6 (interacts with) p44S10	FALSE	interacts with	PSMA6 (interacts with) p44S10
282613	351.3495768	interacts with	TP53 (interacts with) XPO1	FALSE	interacts with	TP53 (interacts with) XPO1
233456	61.40523289	interacts with	CALM1 (interacts with) NFKB1	FALSE	interacts with	CALM1 (interacts with) NFKB1
249840	99.49515865	interacts with	PSMA6 (interacts with) RIPK2	FALSE	interacts with	PSMA6 (interacts with) RIPK2
282614	492.7864636	interacts with	TP53 (interacts with) UBE2N	FALSE	interacts with	TP53 (interacts with) UBE2N
233455	85.99097586	interacts with	CALM1 (interacts with) NFKBIA	FALSE	interacts with	CALM1 (interacts with) NFKBIA
249839	32.61860974	interacts with	PSMA6 (interacts with) PSMD4	FALSE	interacts with	PSMA6 (interacts with) PSMD4
249846	32.55736926	interacts with	PSMA6 (interacts with) USP14	FALSE	interacts with	PSMA6 (interacts with) USP14
233462	74.07049951	interacts with	CALM1 (interacts with) TNFRSF1A	FALSE	interacts with	CALM1 (interacts with) TNFRSF1A
249845	41.93393429	interacts with	PSMA6 (interacts with) PSMD13	FALSE	interacts with	PSMA6 (interacts with) PSMD13
233461	129.173843	interacts with	CALM1 (interacts with) MAP3K3	FALSE	interacts with	CALM1 (interacts with) MAP3K3
266225	627.1902081	interacts with	NFKBIA (interacts with) UBC	FALSE	interacts with	NFKBIA (interacts with) UBC
200692	134.8169487	interacts with	IKBKE (interacts with) RPS16	FALSE	interacts with	IKBKE (interacts with) RPS16
233460	92.27102833	interacts with	CALM1 (interacts with) IKBKB	FALSE	interacts with	CALM1 (interacts with) IKBKB
249844	93.74030308	interacts with	PSMA6 (interacts with) PSMD7	FALSE	interacts with	PSMA6 (interacts with) PSMD7
200691	152.2667992	interacts with	IKBKE (interacts with) RPS14	FALSE	interacts with	IKBKE (interacts with) RPS14
282610	699.3230139	interacts with	TP53 (interacts with) UBE2A	FALSE	interacts with	TP53 (interacts with) UBE2A
266226	221.0307832	interacts with	NFKBIA (interacts with) SKP1A	FALSE	interacts with	NFKBIA (interacts with) SKP1A
233459	67.63162855	interacts with	CALM1 (interacts with) CHUK	FALSE	interacts with	CALM1 (interacts with) CHUK
200698	223.6245098	interacts with	IKBKE (interacts with) PSMD3	FALSE	interacts with	IKBKE (interacts with) PSMD3
249850	49.872297	interacts with	PSMA6 (interacts with) UCHL5	FALSE	interacts with	PSMA6 (interacts with) UCHL5
266235	163.4903197	interacts with	NFKBIA (interacts with) RELA	FALSE	interacts with	NFKBIA (interacts with) RELA
233466	67.60663838	interacts with	CALM1 (interacts with) MAP3K14	FALSE	interacts with	CALM1 (interacts with) MAP3K14
233465	225.2398263	interacts with	CALM1 (interacts with) EGFR	FALSE	interacts with	CALM1 (interacts with) EGFR
233464	90.54803668	interacts with	CALM1 (interacts with) PPP2R2B	FALSE	interacts with	CALM1 (interacts with) PPP2R2B
282615	457.079467	interacts with	TP53 (interacts with) TPT1	FALSE	interacts with	TP53 (interacts with) TPT1
266232	102.8146912	interacts with	NFKBIA (interacts with) SLC25A5	FALSE	interacts with	NFKBIA (interacts with) SLC25A5
233469	52.1557909	interacts with	CALM1 (interacts with) NFKB2	FALSE	interacts with	CALM1 (interacts with) NFKB2
200700	390.1048081	interacts with	IKBKE (interacts with) PFDN5	FALSE	interacts with	IKBKE (interacts with) PFDN5
233468	112.725463	interacts with	CALM1 (interacts with) MAPT	FALSE	interacts with	CALM1 (interacts with) MAPT
200706	189.3584877	interacts with	IKBKE (interacts with) RPN1	FALSE	interacts with	IKBKE (interacts with) RPN1
233473	131.5310204	interacts with	CALM1 (interacts with) HSP90AA1	FALSE	interacts with	CALM1 (interacts with) HSP90AA1
233471	72.76879908	interacts with	CALM1 (interacts with) TNFRSF1B	FALSE	interacts with	CALM1 (interacts with) TNFRSF1B
282637	668.4594586	interacts with	TP53 (interacts with) UBA52	FALSE	interacts with	TP53 (interacts with) UBA52
233480	44.53081902	interacts with	CALM1 (interacts with) TBK1	FALSE	interacts with	CALM1 (interacts with) TBK1
282638	622.2212266	interacts with	TP53 (interacts with) UBB	FALSE	interacts with	TP53 (interacts with) UBB
233484	161.2040709	interacts with	CALM1 (interacts with) CCNE1	FALSE	interacts with	CALM1 (interacts with) CCNE1
282644	418.675982	interacts with	TP53 (interacts with) TP53BP2	FALSE	interacts with	TP53 (interacts with) TP53BP2
233488	67.20112564	interacts with	CALM1 (interacts with) NFKBIB	FALSE	interacts with	CALM1 (interacts with) NFKBIB
233487	242.697752	interacts with	CALM1 (interacts with) TCF3	FALSE	interacts with	CALM1 (interacts with) TCF3
282646	639.385022	interacts with	TP53 (interacts with) USP7	FALSE	interacts with	TP53 (interacts with) USP7
233493	143.976463	interacts with	CALM1 (interacts with) EEF1D	FALSE	interacts with	CALM1 (interacts with) EEF1D
233492	63.1633243	interacts with	CALM1 (interacts with) TNF	FALSE	interacts with	CALM1 (interacts with) TNF
282641	411.4112921	interacts with	TP53 (interacts with) UBE2I	FALSE	interacts with	TP53 (interacts with) UBE2I
282652	2236.275276	interacts with	TP53 (interacts with) UBC	FALSE	interacts with	TP53 (interacts with) UBC
233497	156.8773651	interacts with	CALM1 (interacts with) IKBKE	FALSE	interacts with	CALM1 (interacts with) IKBKE
233495	56.87234333	interacts with	CALM1 (interacts with) RIPK2	FALSE	interacts with	CALM1 (interacts with) RIPK2
233501	52.59908663	interacts with	CALM1 (interacts with) NFKBIE	FALSE	interacts with	CALM1 (interacts with) NFKBIE
233500	166.1009049	interacts with	CALM1 (interacts with) DDX5	FALSE	interacts with	CALM1 (interacts with) DDX5
233499	178.6835357	interacts with	CALM1 (interacts with) PCNT2	FALSE	interacts with	CALM1 (interacts with) PCNT2
249890	378.3865679	interacts with	DDX19 (interacts with) GNB2L1	FALSE	interacts with	DDX19 (interacts with) GNB2L1
249889	255.0655113	interacts with	DDX19 (interacts with) SKP1A	FALSE	interacts with	DDX19 (interacts with) SKP1A
233505	51.20664009	interacts with	CALM1 (interacts with) TANK	FALSE	interacts with	CALM1 (interacts with) TANK
249888	1475.923846	interacts with	DDX19 (interacts with) IKBKG	FALSE	interacts with	DDX19 (interacts with) IKBKG
233503	103.2010616	interacts with	CALM1 (interacts with) SYT1	FALSE	interacts with	CALM1 (interacts with) SYT1
282662	169.7652288	interacts with	MDM2 (interacts with) PLK1	FALSE	interacts with	MDM2 (interacts with) PLK1
249894	44.04663794	interacts with	DDX19 (interacts with) XPO7	FALSE	interacts with	DDX19 (interacts with) XPO7
282655	200.0410208	interacts with	MDM2 (interacts with) PCNA	FALSE	interacts with	MDM2 (interacts with) PCNA
282656	182.446904	interacts with	MDM2 (interacts with) UBE2I	FALSE	interacts with	MDM2 (interacts with) UBE2I
200740	261.8336896	interacts with	IKBKE (interacts with) PAI-RBP1	FALSE	interacts with	IKBKE (interacts with) PAI-RBP1
233508	158.9285047	interacts with	CALM1 (interacts with) NOS3	FALSE	interacts with	CALM1 (interacts with) NOS3
282657	133.3007656	interacts with	MDM2 (interacts with) NR3C1	FALSE	interacts with	MDM2 (interacts with) NR3C1
266283	44.07787235	interacts with	CSDE1 (interacts with) PCSK7	FALSE	interacts with	CSDE1 (interacts with) PCSK7
282667	151.2004578	interacts with	MDM2 (interacts with) UBB	FALSE	interacts with	MDM2 (interacts with) UBB
233512	330.8651434	interacts with	CALM1 (interacts with) USP20	FALSE	interacts with	CALM1 (interacts with) USP20
282670	292.0258611	interacts with	MDM2 (interacts with) RPS27A	FALSE	interacts with	MDM2 (interacts with) RPS27A
282663	497.8264574	interacts with	MDM2 (interacts with) VIM	FALSE	interacts with	MDM2 (interacts with) VIM
266280	1012.109948	interacts with	CSDE1 (interacts with) PABPC1	FALSE	interacts with	CSDE1 (interacts with) PABPC1
266281	528.0217205	interacts with	CSDE1 (interacts with) SYNCRIP	FALSE	interacts with	CSDE1 (interacts with) SYNCRIP
282665	143.4705395	interacts with	MDM2 (interacts with) UBE2D1	FALSE	interacts with	MDM2 (interacts with) UBE2D1
200747	157.6275932	interacts with	IKBKE (interacts with) SMC4L1	FALSE	interacts with	IKBKE (interacts with) SMC4L1
266282	259.790459	interacts with	CSDE1 (interacts with) HNRNPD	FALSE	interacts with	CSDE1 (interacts with) HNRNPD
282666	120.7742116	interacts with	MDM2 (interacts with) TUBB	FALSE	interacts with	MDM2 (interacts with) TUBB
233515	122.5295035	interacts with	CALM1 (interacts with) NR3C1	FALSE	interacts with	CALM1 (interacts with) NR3C1
282677	134.0629938	interacts with	MDM2 (interacts with) SET	FALSE	interacts with	MDM2 (interacts with) SET
282671	97.06839736	interacts with	MDM2 (interacts with) TRIM28	FALSE	interacts with	MDM2 (interacts with) TRIM28
233525	106.4746591	interacts with	CALM1 (interacts with) RCHY1	FALSE	interacts with	CALM1 (interacts with) RCHY1
233524	67.45795976	interacts with	CALM1 (interacts with) MYO6	FALSE	interacts with	CALM1 (interacts with) MYO6
200755	153.4298323	interacts with	IKBKE (interacts with) RARS	FALSE	interacts with	IKBKE (interacts with) RARS
282685	167.8802917	interacts with	MDM2 (interacts with) PSMD2	FALSE	interacts with	MDM2 (interacts with) PSMD2
282681	119.7775446	interacts with	MDM2 (interacts with) RBL2	FALSE	interacts with	MDM2 (interacts with) RBL2
282682	240.2347453	interacts with	MDM2 (interacts with) MTA1	FALSE	interacts with	MDM2 (interacts with) MTA1
200767	349.6546196	interacts with	IKBKE (interacts with) KTN1	FALSE	interacts with	IKBKE (interacts with) KTN1
282701	105.2081749	interacts with	MDM2 (interacts with) RCHY1	FALSE	interacts with	MDM2 (interacts with) RCHY1
282696	236.6466017	interacts with	MDM2 (interacts with) UBE2A	FALSE	interacts with	MDM2 (interacts with) UBE2A
200785	221.9945208	interacts with	IKBKE (interacts with) LOC340061	FALSE	interacts with	IKBKE (interacts with) LOC340061
266325	120.8640996	interacts with	RPA1 (interacts with) TREX1	FALSE	interacts with	RPA1 (interacts with) TREX1
266326	745.1257947	interacts with	RPA1 (interacts with) TP53	FALSE	interacts with	RPA1 (interacts with) TP53
282703	751.1282233	interacts with	MDM2 (interacts with) UBE2G2	FALSE	interacts with	MDM2 (interacts with) UBE2G2
217173	846.5096952	interacts with	RARS (interacts with) UBC	FALSE	interacts with	RARS (interacts with) UBC
282715	217.7225508	interacts with	MDM2 (interacts with) RPS20	FALSE	interacts with	MDM2 (interacts with) RPS20
217176	23.97219491	interacts with	RARS (interacts with) TANK	FALSE	interacts with	RARS (interacts with) TANK
217175	79.66021073	interacts with	RARS (interacts with) TNFRSF1A	FALSE	interacts with	RARS (interacts with) TNFRSF1A
282711	161.0822941	interacts with	MDM2 (interacts with) RPS27	FALSE	interacts with	MDM2 (interacts with) RPS27
282712	124.2562088	interacts with	MDM2 (interacts with) RRM2B	FALSE	interacts with	MDM2 (interacts with) RRM2B
266330	45.14104599	interacts with	RPA1 (interacts with) RPA2	FALSE	interacts with	RPA1 (interacts with) RPA2
266347	322.7411568	interacts with	IKZF1 (interacts with) UBE2I	FALSE	interacts with	IKZF1 (interacts with) UBE2I
282730	158.5502941	interacts with	MDM2 (interacts with) RPS27L	FALSE	interacts with	MDM2 (interacts with) RPS27L
282742	621.6843008	interacts with	MDM2 (interacts with) UBC	FALSE	interacts with	MDM2 (interacts with) UBC
266352	225.8832513	interacts with	IKZF1 (interacts with) SIN3A	FALSE	interacts with	IKZF1 (interacts with) SIN3A
266353	42.8562443	interacts with	IKZF1 (interacts with) IKZF3	FALSE	interacts with	IKZF1 (interacts with) IKZF3
249975	759.9944298	interacts with	NR2F6 (interacts with) NR3C1	FALSE	interacts with	NR2F6 (interacts with) NR3C1
200830	488.3183878	interacts with	IKBKE (interacts with) TALDO1	FALSE	interacts with	IKBKE (interacts with) TALDO1
282743	134.3637886	interacts with	MDM2 (interacts with) PSMD10	FALSE	interacts with	MDM2 (interacts with) PSMD10
282744	130.7755515	interacts with	MDM2 (interacts with) RB1	FALSE	interacts with	MDM2 (interacts with) RB1
233596	342.6611674	interacts with	CALM1 (interacts with) RALA	FALSE	interacts with	CALM1 (interacts with) RALA
282745	141.5865598	interacts with	MDM2 (interacts with) SUMO1	FALSE	interacts with	MDM2 (interacts with) SUMO1
282755	101.5082725	interacts with	MDM2 (interacts with) RPL23	FALSE	interacts with	MDM2 (interacts with) RPL23
233602	358.3580696	interacts with	CALM1 (interacts with) GRK4	FALSE	interacts with	CALM1 (interacts with) GRK4
200832	317.9556146	interacts with	IKBKE (interacts with) LARS	FALSE	interacts with	IKBKE (interacts with) LARS
217220	1844	interacts with	FLJ10081 (interacts with) RPS27A	FALSE	interacts with	FLJ10081 (interacts with) RPS27A
282753	116.8157012	interacts with	MDM2 (interacts with) TP73	FALSE	interacts with	MDM2 (interacts with) TP73
233604	340.1420701	interacts with	CALM1 (interacts with) CSNK2A1	FALSE	interacts with	CALM1 (interacts with) CSNK2A1
282754	199.6205911	interacts with	MDM2 (interacts with) USP7	FALSE	interacts with	MDM2 (interacts with) USP7
200840	191.6062641	interacts with	IKBKE (interacts with) SFXN1	FALSE	interacts with	IKBKE (interacts with) SFXN1
217229	261.5234433	interacts with	C6orf4 (interacts with) CHUK	FALSE	interacts with	C6orf4 (interacts with) CHUK
282760	166.8634664	interacts with	MDM2 (interacts with) RPL11	FALSE	interacts with	MDM2 (interacts with) RPL11
217228	343.7692144	interacts with	C6orf4 (interacts with) IKBKB	FALSE	interacts with	C6orf4 (interacts with) IKBKB
282761	259.2457597	interacts with	MDM2 (interacts with) TP53	FALSE	interacts with	MDM2 (interacts with) TP53
217227	295.1408602	interacts with	C6orf4 (interacts with) TRAF2	FALSE	interacts with	C6orf4 (interacts with) TRAF2
217234	943.5664821	interacts with	C6orf4 (interacts with) IKBKG	FALSE	interacts with	C6orf4 (interacts with) IKBKG
200874	406.337967	interacts with	IKBKE (interacts with) TPM3	FALSE	interacts with	IKBKE (interacts with) TPM3
282814	1844	interacts with	AF15Q14 (interacts with) PPP1CA	FALSE	interacts with	AF15Q14 (interacts with) PPP1CA
200892	184.9007441	interacts with	IKBKE (interacts with) MYL6	FALSE	interacts with	IKBKE (interacts with) MYL6
200903	373.5782637	interacts with	IKBKE (interacts with) NARS	FALSE	interacts with	IKBKE (interacts with) NARS
266452	453.1421499	interacts with	ELL (interacts with) ZHX1	FALSE	interacts with	ELL (interacts with) ZHX1
266453	95.99815153	interacts with	ELL (interacts with) TCEA1	FALSE	interacts with	ELL (interacts with) TCEA1
233686	106.6175061	interacts with	SMAD1 (interacts with) SMAD3	FALSE	interacts with	SMAD1 (interacts with) SMAD3
233685	794.2389188	interacts with	SMAD1 (interacts with) UBC	FALSE	interacts with	SMAD1 (interacts with) UBC
266448	564.9651626	interacts with	ELL (interacts with) POLR2A	FALSE	interacts with	ELL (interacts with) POLR2A
266449	3071.621586	interacts with	ELL (interacts with) TP53	FALSE	interacts with	ELL (interacts with) TP53
200921	212.6650593	interacts with	IKBKE (interacts with) MYH10	FALSE	interacts with	IKBKE (interacts with) MYH10
233689	96.5737828	interacts with	SMAD1 (interacts with) SQSTM1	FALSE	interacts with	SMAD1 (interacts with) SQSTM1
233687	143.333748	interacts with	SMAD1 (interacts with) STAT3	FALSE	interacts with	SMAD1 (interacts with) STAT3
266457	284.6882828	interacts with	ELL (interacts with) TFPT	FALSE	interacts with	ELL (interacts with) TFPT
233691	103.9857195	interacts with	SMAD1 (interacts with) XPO1	FALSE	interacts with	SMAD1 (interacts with) XPO1
233698	84.91078045	interacts with	SMAD1 (interacts with) WWP1	FALSE	interacts with	SMAD1 (interacts with) WWP1
250082	512.2202016	interacts with	AD-003 (interacts with) IKBKE	FALSE	interacts with	AD-003 (interacts with) IKBKE
250081	1344.577673	interacts with	AD-003 (interacts with) IKBKG	FALSE	interacts with	AD-003 (interacts with) IKBKG
233696	63.75012962	interacts with	SMAD1 (interacts with) SMAD5	FALSE	interacts with	SMAD1 (interacts with) SMAD5
200932	174.3327266	interacts with	IKBKE (interacts with) MRCL3	FALSE	interacts with	IKBKE (interacts with) MRCL3
200941	119.9616881	interacts with	IKBKE (interacts with) TANK	FALSE	interacts with	IKBKE (interacts with) TANK
233718	100.5230481	interacts with	SMAD1 (interacts with) UBA52	FALSE	interacts with	SMAD1 (interacts with) UBA52
233717	298.1726694	interacts with	SMAD1 (interacts with) UCHL3	FALSE	interacts with	SMAD1 (interacts with) UCHL3
233721	149.0803904	interacts with	SMAD1 (interacts with) TGFBR1	FALSE	interacts with	SMAD1 (interacts with) TGFBR1
200962	346.7380344	interacts with	SAFB (interacts with) SRPK1	FALSE	interacts with	SAFB (interacts with) SRPK1
233735	269.1415908	interacts with	SMAD1 (interacts with) STUB1	FALSE	interacts with	SMAD1 (interacts with) STUB1
200973	336.3884474	interacts with	CUEDC1 (interacts with) SMURF2	FALSE	interacts with	CUEDC1 (interacts with) SMURF2
233741	86.67281727	interacts with	SMAD1 (interacts with) SMURF2	FALSE	interacts with	SMAD1 (interacts with) SMURF2
200972	1544.901682	interacts with	CUEDC1 (interacts with) IKBKG	FALSE	interacts with	CUEDC1 (interacts with) IKBKG
233745	37.15090289	interacts with	SMAD1 (interacts with) SMURF1	FALSE	interacts with	SMAD1 (interacts with) SMURF1
233743	55.81391533	interacts with	SMAD1 (interacts with) SMAD4	FALSE	interacts with	SMAD1 (interacts with) SMAD4
217365	348.5880668	interacts with	BRF2 (interacts with) MCM7	FALSE	interacts with	BRF2 (interacts with) MCM7
233747	432.1418623	interacts with	SMAD1 (interacts with) ZFYVE16	FALSE	interacts with	SMAD1 (interacts with) ZFYVE16
233754	718.8943205	interacts with	HSPA1A (interacts with) UBC	FALSE	interacts with	HSPA1A (interacts with) UBC
217367	306.8278552	interacts with	BRF2 (interacts with) RBL2	FALSE	interacts with	BRF2 (interacts with) RBL2
233758	143.037956	interacts with	HSPA1A (interacts with) SMAD3	FALSE	interacts with	HSPA1A (interacts with) SMAD3
233757	129.0976952	interacts with	HSPA1A (interacts with) SMAD2	FALSE	interacts with	HSPA1A (interacts with) SMAD2
233756	154.8120379	interacts with	HSPA1A (interacts with) YWHAZ	FALSE	interacts with	HSPA1A (interacts with) YWHAZ
233755	254.7889543	interacts with	HSPA1A (interacts with) YWHAG	FALSE	interacts with	HSPA1A (interacts with) YWHAG
200994	458.8939518	interacts with	DNAJB2 (interacts with) SMAD4	FALSE	interacts with	DNAJB2 (interacts with) SMAD4
233762	321.0057282	interacts with	HSPA1A (interacts with) TP53	FALSE	interacts with	HSPA1A (interacts with) TP53
233760	124.85352	interacts with	HSPA1A (interacts with) HSPCA	FALSE	interacts with	HSPA1A (interacts with) HSPCA
233759	1725.548477	interacts with	HSPA1A (interacts with) IKBKG	FALSE	interacts with	HSPA1A (interacts with) IKBKG
217382	227.5536695	interacts with	BRF2 (interacts with) PSMD3	FALSE	interacts with	BRF2 (interacts with) PSMD3
200998	450.7778703	interacts with	DNAJB2 (interacts with) UBA52	FALSE	interacts with	DNAJB2 (interacts with) UBA52
233766	176.7200035	interacts with	HSPA1A (interacts with) SUMO2	FALSE	interacts with	HSPA1A (interacts with) SUMO2
217381	247.8302662	interacts with	BRF2 (interacts with) GCN1L1	FALSE	interacts with	BRF2 (interacts with) GCN1L1
200996	571.1768939	interacts with	DNAJB2 (interacts with) RPS27A	FALSE	interacts with	DNAJB2 (interacts with) RPS27A
233764	126.4320609	interacts with	HSPA1A (interacts with) NR3C1	FALSE	interacts with	HSPA1A (interacts with) NR3C1
233763	253.991644	interacts with	HSPA1A (interacts with) PRKCA	FALSE	interacts with	HSPA1A (interacts with) PRKCA
233769	155.56328	interacts with	HSPA1A (interacts with) MAX	FALSE	interacts with	HSPA1A (interacts with) MAX
201000	375.6841388	interacts with	DNAJB2 (interacts with) HD	FALSE	interacts with	DNAJB2 (interacts with) HD
233767	95.53052916	interacts with	HSPA1A (interacts with) PPP2R2B	FALSE	interacts with	HSPA1A (interacts with) PPP2R2B
233773	64.82473493	interacts with	HSPA1A (interacts with) HSPCB	FALSE	interacts with	HSPA1A (interacts with) HSPCB
217388	320.9044914	interacts with	BRF2 (interacts with) MARS	FALSE	interacts with	BRF2 (interacts with) MARS
233772	86.60032428	interacts with	HSPA1A (interacts with) PARK2	FALSE	interacts with	HSPA1A (interacts with) PARK2
233778	180.7318411	interacts with	HSPA1A (interacts with) TRAF3IP1	FALSE	interacts with	HSPA1A (interacts with) TRAF3IP1
233777	221.9040156	interacts with	HSPA1A (interacts with) TCERG1	FALSE	interacts with	HSPA1A (interacts with) TCERG1
233775	128.5223877	interacts with	HSPA1A (interacts with) MAP3K5	FALSE	interacts with	HSPA1A (interacts with) MAP3K5
233790	60.60885944	interacts with	HSPA1A (interacts with) HSPA8	FALSE	interacts with	HSPA1A (interacts with) HSPA8
233787	216.0584457	interacts with	HSPA1A (interacts with) PPP1R15A	FALSE	interacts with	HSPA1A (interacts with) PPP1R15A
217409	277.9684935	interacts with	BRF2 (interacts with) DKFZP564C186	FALSE	interacts with	BRF2 (interacts with) DKFZP564C186
217408	136.5521812	interacts with	BRF2 (interacts with) XPO7	FALSE	interacts with	BRF2 (interacts with) XPO7
233805	277.4010671	interacts with	HSPA1A (interacts with) NQO1	FALSE	interacts with	HSPA1A (interacts with) NQO1
250194	123.7944795	interacts with	LOC340061 (interacts with) UBA52	FALSE	interacts with	LOC340061 (interacts with) UBA52
250193	156.4785773	interacts with	LOC340061 (interacts with) RPS27A	FALSE	interacts with	LOC340061 (interacts with) RPS27A
250192	190.6412349	interacts with	LOC340061 (interacts with) UBB	FALSE	interacts with	LOC340061 (interacts with) UBB
250191	1030.013058	interacts with	LOC340061 (interacts with) UBC	FALSE	interacts with	LOC340061 (interacts with) UBC
250196	142.3598539	interacts with	LOC340061 (interacts with) TBK1	FALSE	interacts with	LOC340061 (interacts with) TBK1
233815	251.7630055	interacts with	HSPA1A (interacts with) STUB1	FALSE	interacts with	HSPA1A (interacts with) STUB1
250231	1042.891984	interacts with	NDN (interacts with) TP53	FALSE	interacts with	NDN (interacts with) TP53
283033	1040.554898	interacts with	PRKAB2 (interacts with) PRKDC	FALSE	interacts with	PRKAB2 (interacts with) PRKDC
283059	77.70255979	interacts with	MSH2 (interacts with) MYC	FALSE	interacts with	MSH2 (interacts with) MYC
283060	110.9818802	interacts with	MSH2 (interacts with) SUMO2	FALSE	interacts with	MSH2 (interacts with) SUMO2
217526	1844	interacts with	KIAA1310 (interacts with) RPS27A	FALSE	interacts with	KIAA1310 (interacts with) RPS27A
283057	609.4173131	interacts with	MSH2 (interacts with) UBC	FALSE	interacts with	MSH2 (interacts with) UBC
283058	264.4850309	interacts with	MSH2 (interacts with) TP53	FALSE	interacts with	MSH2 (interacts with) TP53
283067	125.9115035	interacts with	MSH2 (interacts with) PCNA	FALSE	interacts with	MSH2 (interacts with) PCNA
283068	86.85367228	interacts with	MSH2 (interacts with) TREX1	FALSE	interacts with	MSH2 (interacts with) TREX1
266690	354.4847328	interacts with	SMAD5 (interacts with) STUB1	FALSE	interacts with	SMAD5 (interacts with) STUB1
266699	122.892055	interacts with	SMAD5 (interacts with) SMURF2	FALSE	interacts with	SMAD5 (interacts with) SMURF2
266708	198.2807294	interacts with	SMAD5 (interacts with) ZFYVE16	FALSE	interacts with	SMAD5 (interacts with) ZFYVE16
266704	155.8470044	interacts with	SMAD5 (interacts with) WWP1	FALSE	interacts with	SMAD5 (interacts with) WWP1
266705	74.0804813	interacts with	SMAD5 (interacts with) SMURF1	FALSE	interacts with	SMAD5 (interacts with) SMURF1
217570	193.6199236	interacts with	FUBP1 (interacts with) MAPK14	FALSE	interacts with	FUBP1 (interacts with) MAPK14
217569	1506.054679	interacts with	FUBP1 (interacts with) UBC	FALSE	interacts with	FUBP1 (interacts with) UBC
283109	295.2650627	interacts with	MARK2 (interacts with) YWHAG	FALSE	interacts with	MARK2 (interacts with) YWHAG
217573	207.6538928	interacts with	FUBP1 (interacts with) SMN1	FALSE	interacts with	FUBP1 (interacts with) SMN1
217572	289.9092605	interacts with	FUBP1 (interacts with) VIM	FALSE	interacts with	FUBP1 (interacts with) VIM
283118	95.36528716	interacts with	MARK2 (interacts with) MARK3	FALSE	interacts with	MARK2 (interacts with) MARK3
217575	169.3442773	interacts with	FUBP1 (interacts with) IMMT	FALSE	interacts with	FUBP1 (interacts with) IMMT
[truncated: 4,573 more rows]
