# Supplementary material for: Construction of a HOXA11-AS-Interacted Network in Keloid Fibroblasts Using Integrated Bioinformatic Analysis and in Vitro Validation
Source: Front Genet. 2022 Mar 31;13:844198. doi: 10.3389/fgene.2022.844198 (PMC9010035; doi:10.3389/fgene.2022.844198)
Supplement: Supplementary file 16 [file Table5.XLSX]

## Sheet: sample 1 vs. sample 0
#Condition pair: sample 1vs sample 0 Column A: lncRNA_id, The transcript id of lncRNA. Column B: log2FC, if the comparison is test vs control, log2 of the fold change will be calculated by Test_FPKM - Control_FPKM. Column C: Fold_Change, 2^(log2FC) of lncRNA. Column D: p_value, The p-value of the F-statistic for gene. The p-value will be setted as 1 if any group in the comparison has no repilicat…
Differential expression lncRNA (antisense)									Expression information of mRNA
lncRNA_id	log2FC	Fold_Change	p_value	q_value	R-1_FPKM	K-1_FPKM	Regulation	Relationship	mRNA_id	log2FC	Fold_Change	p_value	q_value	R-1_FPKM	K-1_FPKM
ENST00000468303	-0.68183	0.623374	1	1	0.0200833	0.701914	down	natural antisense	ENST00000003912.7_2	-0.946205	0.518996	1	1	3.63775	4.58395
ENST00000485422	-1.70931	0.305806	1	1	0	1.70931	down	natural antisense	ENST00000005260.8_1	-0.167486	0.890393	1	1	1.11562	1.28311
ENST00000498475	0.98869	1.98438	1	1	0.98869	0	up	intronic antisense	ENST00000185150.8_3	0.134651	1.09783	1	1	4.05195	3.9173
ENST00000621548	0.640083	1.55842	1	1	2.02935	1.38927	up	natural antisense	ENST00000219313.8_1	-0.507654	0.703365	1	1	3.93009	4.43775
ENST00000591482	1.21865	2.32729	1	1	1.21865	0	up	intronic antisense	ENST00000226218.8_1	-0.396708	0.75959	1	1	0.315671	0.712378
ENST00000461972	0.709709	1.63547	1	1	0.734211	0.0245027	up	natural antisense	ENST00000238721.8_1	-0.501294	0.706473	1	1	2.14561	2.64691
ENST00000489088	1.06897	2.09794	1	1	1.06897	0	up	intronic antisense	ENST00000239891.3_2	0.299911	1.23107	1	1	3.79585	3.49593
ENST00000326237	0.983211	1.97686	1	1	0.983211	0	up	natural antisense	ENST00000245046.6_1	-0.0180228	0.987585	1	1	3.53613	3.55415
ENST00000597996	0.602378	1.51822	1	1	0.680511	0.078133	up	intronic antisense	ENST00000247706.3_1	0.0969109	1.06948	1	1	1.64245	1.54554
ENST00000439987	-2.25861	0.208973	1	1	0	2.25861	down	intronic antisense	ENST00000253934.9_1	0.340062	1.26581	1	1	1.36321	1.02314
ENST00000494188	0.689173	1.61236	1	1	1.41864	0.729468	up	intronic antisense	ENST00000260569.4_2	0.0354329	1.02486	1	1	0.934269	0.898836
ENST00000539956	-0.597924	0.660704	1	1	0.289483	0.887407	down	natural antisense	ENST00000261313.2_1	-0.191555	0.875661	1	1	6.80228	6.99383
ENST00000515125	0.834821	1.78364	1	1	1.44299	0.608173	up	natural antisense	ENST00000261416.11_1	0.268117	1.20424	1	1	5.49528	5.22717
ENST00000623876	-0.959466	0.514247	1	1	0.956373	1.91584	down	natural antisense	ENST00000262027.9_1	0.568712	1.4832	1	1	3.38751	2.8188
ENST00000467961	2.21138	4.63118	1	1	3.61076	1.39938	up	natural antisense	ENST00000264094.7_1	0.127581	1.09246	1	1	0.718847	0.591266
ENST00000462909	-2.02226	0.246172	1	1	0	2.02226	down	natural antisense	ENST00000264094.7_1	0.127581	1.09246	1	1	0.718847	0.591266
ENST00000474766	-0.966051	0.511905	1	1	0.00275004	0.968802	down	natural antisense	ENST00000270824.1_1	-0.239403	0.847096	1	1	2.83978	3.07918
ENST00000423084	0.634726	1.55264	1	1	2.09693	1.4622	up	intronic antisense	ENST00000275569.8_1	1.37732	2.59786	1	1	1.37732	0
ENST00000460059	0.656546	1.5763	1	1	1.35376	0.697212	up	natural antisense	ENST00000283928.9_1	0.346164	1.27118	1	1	3.01528	2.66911
ENST00000555552	-0.627112	0.647471	1	1	0.000180326	0.627292	down	natural antisense	ENST00000286544.3_2	-0.387911	0.764236	1	1	1.37292	1.76083
ENST00000522515	-0.894732	0.537847	1	1	0.775008	1.66974	down	natural antisense	ENST00000287322.4_2	0.491389	1.4058	1	1	3.76939	3.278
ENST00000431419	0.919948	1.89205	1	1	3.19317	2.27322	up	natural antisense	ENST00000292478.8_1	-0.29928	0.812658	1	1	1.64288	1.94216
ENST00000498475	0.98869	1.98438	1	1	0.98869	0	up	intronic antisense	ENST00000295304.4_1	0.216961	1.16228	1	1	1.37482	1.15786
ENST00000497831	0.585039	1.50008	1	1	1.61346	1.02842	up	natural antisense	ENST00000295694.9_1	-0.234261	0.85012	1	1	0.862505	1.09677
ENST00000461361	0.776061	1.71245	1	1	1.05986	0.283803	up	intronic antisense	ENST00000296127.7_1	1.20592	2.30685	1	1	2.85073	1.64481
ENST00000394225	2.81831	7.05337	1	1	4.13587	1.31755	up	intronic antisense	ENST00000296543.9_1	0.948161	1.92941	1	1	3.61296	2.6648
ENST00000556691	1.23878	2.35999	1	1	1.27985	0.0410649	up	natural antisense	ENST00000298307.9_1	-0.450792	0.731641	1	1	0.776192	1.22698
ENST00000530787	0.679115	1.60116	1	1	0.679115	0	up	natural antisense	ENST00000304987.3_1	0.0916034	1.06555	1	1	3.0355	2.9439
ENST00000562842	0.977768	1.96942	1	1	1.08003	0.102259	up	natural antisense	ENST00000307149.9_1	-0.0293111	0.979888	1	1	2.82683	2.85615
ENST00000524482	-0.748111	0.595383	1	1	0.498216	1.24633	down	natural antisense	ENST00000307289.10_1	-0.384544	0.766021	1	1	0.51276	0.897304
ENST00000550712	0.901562	1.86809	1	1	0.901562	0	up	intronic antisense	ENST00000308086.2_1	0.484978	1.39956	1	1	0.943159	0.458181
ENST00000519335	-0.937679	0.522072	1	1	0	0.937679	down	natural antisense	ENST00000308511.8_1	-0.152331	0.899795	1	1	2.205	2.35733
ENST00000461310	-1.82453	0.282333	1	1	1.03176	2.85629	down	intronic antisense	ENST00000309049.8_1	-0.235223	0.849554	1	1	0.406259	0.641482
ENST00000455202	0.865072	1.82143	1	1	1.297	0.431932	up	natural antisense	ENST00000310397.12_3	-0.805723	0.572075	1	1	1.61038	2.4161
ENST00000423084	0.634726	1.55264	1	1	2.09693	1.4622	up	intronic antisense	ENST00000310842.8_2	-1.23694	0.424272	1	1	1.27696	2.5139
ENST00000555403	-1.0894	0.469955	1	1	0.932838	2.02224	down	natural antisense	ENST00000311459.11_3	-0.0178395	0.987711	1	1	0.571743	0.589582
ENST00000624920	1.0553	2.07815	1	1	1.05824	0.00294154	up	natural antisense	ENST00000314028.10_1	-2.15014	0.225291	1	1	1.56285	3.71299
ENST00000585749	-1.27119	0.414319	1	1	0.00281052	1.274	down	natural antisense	ENST00000314616.10_1	0.25797	1.19579	1	1	4.94827	4.69031
ENST00000543153	0.760415	1.69398	1	1	1.35552	0.595104	up	natural antisense	ENST00000315436.7_1	-0.0139302	0.990391	1	1	4.83239	4.84632
ENST00000478193	0.959492	1.94463	1	1	1.30643	0.346935	up	intronic antisense	ENST00000317168.10_1	0.209944	1.15664	1	1	0.945717	0.735773
ENST00000599221	0.762664	1.69662	1	1	0.762664	0	up	intronic antisense	ENST00000317398.10_2	0.273172	1.20846	1	1	1.2258	0.95263
ENST00000571102	-0.661905	0.632043	1	1	0.101416	0.763321	down	intronic antisense	ENST00000318782.8_1	-0.790406	0.578181	1	1	0.356483	1.14689
ENST00000624094	-1.26479	0.416159	1	1	1.33646	2.60125	down	natural antisense	ENST00000320934.7_1	0.43795	1.35468	1	1	3.26357	2.82562
ENST00000461972	0.709709	1.63547	1	1	0.734211	0.0245027	up	natural antisense	ENST00000335934.8_1	-0.568243	0.674438	1	1	2.48111	3.04935
ENST00000468303	-0.68183	0.623374	1	1	0.0200833	0.701914	down	natural antisense	ENST00000339255.2_2	-0.73735	0.59984	1	1	1.73924	2.47659
ENST00000545509	0.950424	1.93244	1	1	0.950424	0	up	natural antisense	ENST00000342628.6_1	-0.309911	0.806692	1	1	1.921	2.23091
ENST00000455202	0.865072	1.82143	1	1	1.297	0.431932	up	natural antisense	ENST00000342631.7_1	-0.143222	0.905495	1	1	0.802417	0.945639
ENST00000461361	0.776061	1.71245	1	1	1.05986	0.283803	up	intronic antisense	ENST00000342790.8_1	1.7512	3.36639	1	1	1.95076	0.199559
ENST00000616901	0.757953	1.69109	1	1	1.06924	0.31129	up	intronic antisense	ENST00000353265.7_1	-0.457165	0.728416	1	1	0.923618	1.38078
ENST00000622976	-0.633512	0.644605	1	1	0.994074	1.62759	down	intronic antisense	ENST00000354636.7_1	-0.355435	0.781634	1	1	0.748897	1.10433
ENST00000496559	-0.800477	0.574159	1	1	0.0594716	0.859949	down	natural antisense	ENST00000354883.10_1	0.038706	1.02719	1	1	0.733218	0.694512
ENST00000491853	0.604784	1.52075	1	1	0.604784	0	up	intronic antisense	ENST00000357325.9_1	-1.42017	0.373668	1	1	2.45925	3.87942
ENST00000618536	-0.599167	0.660135	1	1	0	0.599167	down	natural antisense	ENST00000357447.6_1	0.584282	1.49929	1	1	3.25573	2.67145
ENST00000545509	0.950424	1.93244	1	1	0.950424	0	up	natural antisense	ENST00000359843.7_3	-0.141619	0.906501	1	1	2.1477	2.28932
ENST00000603468	-0.966377	0.51179	1	1	0.556132	1.52251	down	intronic antisense	ENST00000360655.8_3	-0.808565	0.57095	1	1	2.56814	3.37671
ENST00000545509	0.950424	1.93244	1	1	0.950424	0	up	natural antisense	ENST00000361953.7_3	0.340214	1.26594	1	1	1.60468	1.26447
ENST00000491853	0.604784	1.52075	1	1	0.604784	0	up	intronic antisense	ENST00000368206.5_1	0.0566068	1.04002	1	1	1.05412	0.997518
ENST00000491853	0.604784	1.52075	1	1	0.604784	0	up	intronic antisense	ENST00000368209.9_1	-0.276795	0.825423	1	1	5.52065	5.79745
ENST00000497086	-1.10642	0.464444	1	1	0.880878	1.9873	down	natural antisense	ENST00000368690.7_1	0.564798	1.47918	1	1	2.75893	2.19413
ENST00000468437	-0.799298	0.574629	1	1	0	0.799298	down	natural antisense	ENST00000370641.3_1	0.778274	1.71508	1	1	5.25897	4.4807
ENST00000468437	-0.799298	0.574629	1	1	0	0.799298	down	intronic antisense	ENST00000370645.8_1	0.0448666	1.03159	1	1	5.15975	5.11488
ENST00000535644	-1.19848	0.435734	1	1	0.2299	1.42838	down	natural antisense	ENST00000376745.8_1	-0.421805	0.74649	1	1	4.5548	4.9766
ENST00000524482	-0.748111	0.595383	1	1	0.498216	1.24633	down	natural antisense	ENST00000377190.7_2	-0.386759	0.764846	1	1	1.90688	2.29364
ENST00000523351	0.602129	1.51796	1	1	0.614968	0.012839	up	intronic antisense	ENST00000377365.3_1	-0.402041	0.756787	1	1	4.10466	4.5067
ENST00000467961	2.21138	4.63118	1	1	3.61076	1.39938	up	natural antisense	ENST00000377526.3_1	1.80842	3.50257	1	1	2.68116	0.872747
ENST00000462909	-2.02226	0.246172	1	1	0	2.02226	down	natural antisense	ENST00000377526.3_1	1.80842	3.50257	1	1	2.68116	0.872747
ENST00000494188	0.689173	1.61236	1	1	1.41864	0.729468	up	intronic antisense	ENST00000377990.6_2	-0.114966	0.923404	1	1	0.931449	1.04641
ENST00000498475	0.98869	1.98438	1	1	0.98869	0	up	intronic antisense	ENST00000378239.5_3	0.332333	1.25905	1	1	3.38384	3.05151
ENST00000495368	0.649949	1.56911	1	1	0.896785	0.246836	up	natural antisense	ENST00000378940.7_1	0.493959	1.4083	1	1	1.46719	0.973228
ENST00000570555	0.664876	1.58543	1	1	1.62557	0.960699	up	intronic antisense	ENST00000380358.8_2	1.10934	2.15747	1	1	4.18472	3.07538
ENST00000506928	1.29419	2.45239	1	1	1.70603	0.411843	up	natural antisense	ENST00000380494.9_1	0.566294	1.48072	1	1	2.34616	1.77986
ENST00000470606	-1.91654	0.26489	1	1	0.924928	2.84146	down	natural antisense	ENST00000381120.7_1	0.145113	1.10582	1	1	1.98645	1.84133
ENST00000480713	1.05198	2.07337	1	1	1.33305	0.28107	up	intronic antisense	ENST00000391758.5_2	0.0850997	1.06076	1	1	0.863555	0.778455
ENST00000480713	1.05198	2.07337	1	1	1.33305	0.28107	up	intronic antisense	ENST00000391759.5_2	0.297992	1.22943	1	1	3.15218	2.85418
ENST00000624920	1.0553	2.07815	1	1	1.05824	0.00294154	up	natural antisense	ENST00000392334.6_1	0.331005	1.25789	1	1	0.628555	0.297551
ENST00000622976	-0.633512	0.644605	1	1	0.994074	1.62759	down	intronic antisense	ENST00000393577.7_1	0.428003	1.34537	1	1	1.22728	0.799278
ENST00000622976	-0.633512	0.644605	1	1	0.994074	1.62759	down	intronic antisense	ENST00000393578.7_2	-0.410623	0.752298	1	1	2.55153	2.96215
ENST00000467961	2.21138	4.63118	1	1	3.61076	1.39938	up	natural antisense	ENST00000393937.6_1	-0.44333	0.735435	1	1	0.916473	1.3598
ENST00000462909	-2.02226	0.246172	1	1	0	2.02226	down	natural antisense	ENST00000393937.6_1	-0.44333	0.735435	1	1	0.916473	1.3598
ENST00000472729	-0.695037	0.617693	1	1	0.401343	1.09638	down	natural antisense	ENST00000394440.7_1	0.0544726	1.03848	1	1	5.74102	5.68655
ENST00000478193	0.959492	1.94463	1	1	1.30643	0.346935	up	natural antisense	ENST00000394919.5_1	0.0340526	1.02388	1	1	1.23855	1.2045
ENST00000624920	1.0553	2.07815	1	1	1.05824	0.00294154	up	natural antisense	ENST00000398519.9_1	-0.865225	0.548961	1	1	0	0.865225
ENST00000394225	2.81831	7.05337	1	1	4.13587	1.31755	up	intronic antisense	ENST00000398947.1_1	0.139761	1.10172	1	1	3.15526	3.0155
ENST00000469733	-0.756001	0.592136	1	1	0.256025	1.01203	down	natural antisense	ENST00000400921.6_1	-0.311605	0.805745	1	1	0.351972	0.663577
ENST00000464243	0.771924	1.70755	1	1	1.55403	0.78211	up	intronic antisense	ENST00000402285.7_1	0.358424	1.28203	1	1	7.526	7.16757
ENST00000463300	-1.13106	0.456579	1	1	0	1.13106	down	intronic antisense	ENST00000402285.7_1	0.358424	1.28203	1	1	7.526	7.16757
ENST00000435627	-0.767468	0.587448	1	1	0.340648	1.10812	down	natural antisense	ENST00000403263.5_1	0.296486	1.22815	1	1	2.739	2.44251
ENST00000497086	-1.10642	0.464444	1	1	0.880878	1.9873	down	natural antisense	ENST00000403433.5_2	-0.531074	0.69204	1	1	2.4938	3.02487
ENST00000622976	-0.633512	0.644605	1	1	0.994074	1.62759	down	intronic antisense	ENST00000403681.6_2	2.25197	4.76332	1	1	6.03996	3.788
ENST00000498475	0.98869	1.98438	1	1	0.98869	0	up	intronic antisense	ENST00000405123.7_1	0.324501	1.25223	1	1	1.63927	1.31477
ENST00000455202	0.865072	1.82143	1	1	1.297	0.431932	up	natural antisense	ENST00000405547.7_1	-0.619432	0.650927	1	1	0	0.619432
ENST00000461972	0.709709	1.63547	1	1	0.734211	0.0245027	up	natural antisense	ENST00000407482.5_1	-0.563677	0.676575	1	1	0.578013	1.14169
ENST00000461601	2.22018	4.65951	1	1	2.22018	0	up	natural antisense	ENST00000409207.5_1	0.170245	1.12525	1	1	4.33902	4.16878
ENST00000461972	0.709709	1.63547	1	1	0.734211	0.0245027	up	natural antisense	ENST00000413037.1_1	-0.514106	0.700227	1	1	1.82183	2.33594
ENST00000460715	2.36645	5.15669	1	1	2.83089	0.464449	up	natural antisense	ENST00000417752.1_1	-0.807453	0.57139	1	1	0	0.807453
ENST00000488575	0.839942	1.78998	1	1	0.989404	0.149462	up	natural antisense	ENST00000419277.5_1	0.130519	1.09469	1	1	0.653177	0.522658
ENST00000608689	0.810344	1.75363	1	1	0.810344	0	up	natural antisense	ENST00000421422.1_2	-1.21043	0.43214	1	1	1.71218	2.92261
ENST00000476723	-0.656425	0.634449	1	1	0.30009	0.956515	down	intronic antisense	ENST00000421999.7_2	0.179129	1.1322	1	1	1.1583	0.97917
ENST00000461361	0.776061	1.71245	1	1	1.05986	0.283803	up	intronic antisense	ENST00000424952.6_1	-0.850586	0.554559	1	1	2.97645	3.82704
ENST00000622976	-0.633512	0.644605	1	1	0.994074	1.62759	down	intronic antisense	ENST00000425208.6_1	0.651729	1.57105	1	1	3.38783	2.7361
ENST00000460059	0.656546	1.5763	1	1	1.35376	0.697212	up	natural antisense	ENST00000427814.5_1	-0.509371	0.702529	1	1	0.400899	0.910269
ENST00000460059	0.656546	1.5763	1	1	1.35376	0.697212	up	natural antisense	ENST00000430432.5_1	-0.380868	0.767976	1	1	0.33357	0.714438
ENST00000522515	-0.894732	0.537847	1	1	0.775008	1.66974	down	natural antisense	ENST00000432471.6_2	0.630049	1.54762	1	1	1.12343	0.493385
ENST00000483671	0.751179	1.68317	1	1	0.804717	0.0535382	up	intronic antisense	ENST00000435829.6_1	-0.600086	0.659715	1	1	0	0.600086
ENST00000478934	1.00709	2.00985	1	1	2.00948	1.00239	up	natural antisense	ENST00000439602.6_1	-0.00582966	0.995967	1	1	7.78538	7.79121
ENST00000423084	0.634726	1.55264	1	1	2.09693	1.4622	up	intronic antisense	ENST00000454397.1_4	-0.238948	0.847363	1	1	0.369775	0.608723
ENST00000437840	-1.0442	0.484912	1	1	0.754008	1.79821	down	natural antisense	ENST00000463584.1_1	1.20047	2.29814	1	1	1.72765	0.527181
ENST00000471319	1.82699	3.54796	1	1	2.01327	0.18628	up	intronic antisense	ENST00000463584.1_1	1.20047	2.29814	1	1	1.72765	0.527181
ENST00000495368	0.649949	1.56911	1	1	0.896785	0.246836	up	natural antisense	ENST00000491614.5_1	0.525901	1.43983	1	1	2.82322	2.29732
ENST00000487005	-0.618668	0.651272	1	1	0.377285	0.995953	down	intronic antisense	ENST00000494478.5_2	-0.32099	0.80052	1	1	0.551674	0.872663
ENST00000461310	-1.82453	0.282333	1	1	1.03176	2.85629	down	intronic antisense	ENST00000495025.2_1	-0.35693	0.780825	1	1	0.252917	0.609847
ENST00000618536	-0.599167	0.660135	1	1	0	0.599167	down	natural antisense	ENST00000495956.2_1	-0.0156894	0.989184	1	1	3.41955	3.43524
ENST00000487096	-0.602351	0.65868	1	1	0.273159	0.87551	down	intronic antisense	ENST00000497820.1_1	-0.632502	0.645057	1	1	0.0847895	0.717292
ENST00000505852	1.10796	2.1554	1	1	1.81838	0.710419	up	intronic antisense	ENST00000505477.5_1	-0.240067	0.846706	1	1	1.0732	1.31327
ENST00000505852	1.10796	2.1554	1	1	1.81838	0.710419	up	natural antisense	ENST00000506838.5_1	0.328741	1.25592	1	1	0.644006	0.315265
ENST00000609843	0.682929	1.6054	1	1	1.7916	1.10867	up	intronic antisense	ENST00000507166.5_1	0.834494	1.78323	1	1	0.834494	0
ENST00000515125	0.834821	1.78364	1	1	1.44299	0.608173	up	natural antisense	ENST00000509579.1_1	0.392163	1.31236	1	1	1.12279	0.730627
ENST00000515125	0.834821	1.78364	1	1	1.44299	0.608173	up	natural antisense	ENST00000511181.5_1	0.138997	1.10114	1	1	1.36767	1.22868
ENST00000599221	0.762664	1.69662	1	1	0.762664	0	up	intronic antisense	ENST00000512439.6_1	0.220284	1.16496	1	1	1.85797	1.63769
ENST00000515125	0.834821	1.78364	1	1	1.44299	0.608173	up	natural antisense	ENST00000513336.5_1	-0.0804957	0.945733	1	1	0.762675	0.84317
ENST00000524482	-0.748111	0.595383	1	1	0.498216	1.24633	down	natural antisense	ENST00000526060.5_3	1.01544	2.02151	1	1	2.43529	1.41985
ENST00000553725	0.608945	1.52514	1	1	0.608945	0	up	natural antisense	ENST00000529102.1_1	2.28645	4.87854	1	1	2.46918	0.182732
ENST00000524482	-0.748111	0.595383	1	1	0.498216	1.24633	down	natural antisense	ENST00000529639.5_1	-0.0470459	0.967916	1	1	5.50005	5.5471
ENST00000487096	-0.602351	0.65868	1	1	0.273159	0.87551	down	natural antisense	ENST00000534324.5_1	0.206013	1.1535	1	1	0.591445	0.385432
ENST00000545509	0.950424	1.93244	1	1	0.950424	0	up	natural antisense	ENST00000535350.1_1	-0.339096	0.790536	1	1	1.80894	2.14803
ENST00000553725	0.608945	1.52514	1	1	0.608945	0	up	natural antisense	ENST00000535815.5_1	-1.58811	0.332607	1	1	2.0619	3.65002
ENST00000622976	-0.633512	0.644605	1	1	0.994074	1.62759	down	intronic antisense	ENST00000536545.5_1	0.140331	1.10216	1	1	2.36264	2.22231
ENST00000494188	0.689173	1.61236	1	1	1.41864	0.729468	up	intronic antisense	ENST00000537589.1_3	0.255219	1.19352	1	1	0.602683	0.347464
ENST00000491853	0.604784	1.52075	1	1	0.604784	0	up	intronic antisense	ENST00000537739.5_1	-0.47956	0.717196	1	1	3.20267	3.68223
ENST00000495368	0.649949	1.56911	1	1	0.896785	0.246836	up	natural antisense	ENST00000537776.5_1	0.123574	1.08943	1	1	3.60038	3.4768
ENST00000622976	-0.633512	0.644605	1	1	0.994074	1.62759	down	intronic antisense	ENST00000541363.5_1	0.318732	1.24723	1	1	2.70789	2.38916
ENST00000543153	0.760415	1.69398	1	1	1.35552	0.595104	up	natural antisense	ENST00000544233.5_1	0.223296	1.1674	1	1	0.771766	0.54847
ENST00000623876	-0.959466	0.514247	1	1	0.956373	1.91584	down	natural antisense	ENST00000547665.5_1	0.968594	1.95693	1	1	1.50491	0.536318
ENST00000550712	0.901562	1.86809	1	1	0.901562	0	up	intronic antisense	ENST00000547843.1_1	-0.201998	0.869346	1	1	0.982529	1.18453
ENST00000623876	-0.959466	0.514247	1	1	0.956373	1.91584	down	natural antisense	ENST00000548944.1_3	0.40317	1.32241	1	1	0.857914	0.454744
ENST00000623876	-0.959466	0.514247	1	1	0.956373	1.91584	down	natural antisense	ENST00000552914.5_3	0.276176	1.21098	1	1	0.799427	0.523251
ENST00000635274	-0.681861	0.623361	1	1	13.8192	14.501	down	intronic antisense	ENST00000557111.5_1	-0.498489	0.707848	1	1	0.688491	1.18698
ENST00000608689	0.810344	1.75363	1	1	0.810344	0	up	natural antisense	ENST00000559234.5_1	1.14014	2.20403	1	1	1.76344	0.6233
ENST00000439987	-2.25861	0.208973	1	1	0	2.25861	down	intronic antisense	ENST00000566264.1_1	-0.0931367	0.937482	1	1	3.49924	3.59238
ENST00000570555	0.664876	1.58543	1	1	1.62557	0.960699	up	natural antisense	ENST00000571846.5_2	-0.280582	0.823259	1	1	0.402421	0.683003
ENST00000571102	-0.661905	0.632043	1	1	0.101416	0.763321	down	intronic antisense	ENST00000572687.1_1	-2.53003	0.173135	1	1	0	2.53003
ENST00000469733	-0.756001	0.592136	1	1	0.256025	1.01203	down	intronic antisense	ENST00000597060.1	-0.174582	0.886024	1	1	0.503071	0.677653
ENST00000600493	0.721961	1.64942	1	1	1.7399	1.01794	up	natural antisense	ENST00000598758.5_1	-0.0462628	0.968442	1	1	0.854087	0.900349
ENST00000586726	-0.863931	0.549453	1	1	0	0.863931	down	natural antisense	ENST00000607016.1_1	-0.276966	0.825325	1	1	3.2114	3.48837
ENST00000566181	-2.22656	0.213668	1	1	1.82703	4.05358	down	natural antisense	ENST00000609261.5_1	-0.519536	0.697596	1	1	2.91259	3.43213
ENST00000631833	-0.60933	0.655501	1	1	1.33528	1.94461	down	intronic antisense	ENST00000609883.1_1	0.551095	1.4652	1	1	1.08411	0.533018
ENST00000417886	-0.77242	0.585434	1	1	0.969686	1.74211	down	natural antisense	ENST00000613899.4_3	-0.260895	0.83457	1	1	0.580547	0.841442
ENST00000497281	1.03177	2.04453	1	1	1.29148	0.259709	up	intronic antisense	ENST00000618670.4_1	0.0324989	1.02278	1	1	0.8132	0.780701
ENST00000587120	0.865021	1.82137	1	1	1.35264	0.487618	up	natural antisense	ENST00000619929.4_1	-0.300518	0.811961	1	1	3.09556	3.39608
ENST00000541977	-1.18593	0.439542	1	1	0	1.18593	down	natural antisense	ENST00000622602.1_2	0.532376	1.44631	1	1	3.27617	2.7438
ENST00000545509	0.950424	1.93244	1	1	0.950424	0	up	natural antisense	ENST00000627656.2_3	-0.447716	0.733203	1	1	2.2794	2.72712
ENST00000623876	-0.959466	0.514247	1	1	0.956373	1.91584	down	natural antisense	ENST00000628866.2_1	-0.284554	0.820995	1	1	1.85479	2.13934
ENST00000626416	1.58366	2.9973	1	1	1.7644	0.180733	up	natural antisense	ENST00000641641.1_1	0.408572	1.32737	1	1	0.829717	0.421145

## Sheet: sample 2 vs. sample 0
#Condition pair: sample 2 vs sample 0 Column A: lncRNA_id, The transcript id of lncRNA. Column B: log2FC, if the comparison is test vs control, log2 of the fold change will be calculated by Test_FPKM - Control_FPKM. Column C: Fold_Change, 2^(log2FC) of lncRNA. Column D: p_value, The p-value of the F-statistic for gene. The p-value will be setted as 1 if any group in the comparison has no repilica…
Differential expression lncRNA (antisense)									Expression information of mRNA
lncRNA_id	log2FC	Fold_Change	p_value	q_value	R-2_FPKM	K-1_FPKM	Regulation	Relationship	mRNA_id	log2FC	Fold_Change	p_value	q_value	R-2_FPKM	K-1_FPKM
ENST00000468303	-0.626125	0.647914	1	1	0.0757886	0.701914	down	natural antisense	ENST00000003912.7_2	-1.04228	0.485559	1	1	3.54167	4.58395
ENST00000485422	-1.70931	0.305806	1	1	0	1.70931	down	natural antisense	ENST00000005260.8_1	0.0348674	1.02446	1	1	1.31797	1.28311
ENST00000621548	0.603651	1.51956	1	1	1.99292	1.38927	up	natural antisense	ENST00000219313.8_1	0.245324	1.18536	1	1	4.68307	4.43775
ENST00000591482	0.906297	1.87423	1	1	0.906297	0	up	intronic antisense	ENST00000226218.8_1	-0.290368	0.817693	1	1	0.42201	0.712378
ENST00000551237	0.931606	1.9074	1	1	1.45761	0.526001	up	natural antisense	ENST00000240050.8_1	-0.139	0.908148	1	1	0.474867	0.613867
ENST00000638026	-0.622316	0.649627	1	1	0.520403	1.14272	down	natural antisense	ENST00000249636.10_1	0.31461	1.24368	1	1	2.76929	2.45468
ENST00000439987	-2.25861	0.208973	1	1	0	2.25861	down	intronic antisense	ENST00000253934.9_1	-1.02314	0.492043	1	1	0	1.02314
ENST00000494188	0.850762	1.80345	1	1	1.58023	0.729468	up	intronic antisense	ENST00000260569.4_2	-0.898836	0.536319	1	1	0	0.898836
ENST00000553974	-0.821551	0.565833	1	1	0	0.821551	down	intronic antisense	ENST00000261681.8_1	0.0307255	1.02153	1	1	1.82469	1.79397
ENST00000459630	-0.620125	0.650614	1	1	0.00379219	0.623917	down	natural antisense	ENST00000263168.3_1	0.074123	1.05272	1	1	5.68318	5.60905
ENST00000467961	-0.593595	0.662689	1	1	0.805785	1.39938	down	natural antisense	ENST00000264094.7_1	-0.0973439	0.934752	1	1	0.493922	0.591266
ENST00000558928	1.4867	2.80248	1	1	2.02231	0.535608	up	natural antisense	ENST00000268138.11_1	-0.392878	0.761609	1	1	0.894954	1.28783
ENST00000536687	1.28468	2.43628	1	1	1.46319	0.178506	up	natural antisense	ENST00000278826.10_1	-0.124057	0.917604	1	1	1.423	1.54706
ENST00000563040	0.592978	1.50836	1	1	1.10076	0.507781	up	natural antisense	ENST00000279392.7_1	-0.26464	0.832407	1	1	1.33256	1.5972
ENST00000578216	-0.652107	0.63635	1	1	0.611982	1.26409	down	natural antisense	ENST00000284240.9_1	-0.431583	0.741448	1	1	6.15948	6.59107
ENST00000522515	-0.854117	0.553204	1	1	0.815623	1.66974	down	natural antisense	ENST00000287322.4_2	0.406797	1.32574	1	1	3.6848	3.278
ENST00000487096	-0.760626	0.59024	1	1	0.114884	0.87551	down	natural antisense	ENST00000287899.13_2	0.119107	1.08606	1	1	0.677263	0.558156
ENST00000412446	-0.695656	0.617429	1	1	0.493783	1.18944	down	natural antisense	ENST00000288985.11_1	0.107333	1.07724	1	1	2.32198	2.21464
ENST00000479076	1.29259	2.44968	1	1	1.34513	0.0525383	up	natural antisense	ENST00000295566.8_2	0.514194	1.4282	1	1	2.16176	1.64756
ENST00000480968	-0.741317	0.598193	1	1	0.198018	0.939335	down	natural antisense	ENST00000295694.9_1	-0.000214523	0.999851	1	1	1.09655	1.09677
ENST00000511466	-0.665672	0.630395	1	1	0.836304	1.50198	down	natural antisense	ENST00000296577.8_1	0.520304	1.43426	1	1	4.9387	4.4184
ENST00000513539	-0.602596	0.658568	1	1	1.28601	1.8886	down	natural antisense	ENST00000296805.7_1	-0.485849	0.714077	1	1	1.53693	2.02278
ENST00000532446	3.48212	11.1744	1	1	4.85722	1.37509	up	natural antisense	ENST00000307980.6_1	0.381112	1.30235	1	1	1.35112	0.970008
ENST00000550712	0.985707	1.98028	1	1	0.985707	0	up	intronic antisense	ENST00000308086.2_1	0.371071	1.29331	1	1	0.829253	0.458181
ENST00000519335	-0.937679	0.522072	1	1	0	0.937679	down	natural antisense	ENST00000308511.8_1	-0.042283	0.971117	1	1	2.31505	2.35733
ENST00000455202	0.794067	1.73396	1	1	1.226	0.431932	up	natural antisense	ENST00000310397.12_3	-0.852864	0.553684	1	1	1.56324	2.4161
ENST00000418663	0.777496	1.71415	1	1	2.52438	1.74689	up	natural antisense	ENST00000310842.8_2	0.180868	1.13357	1	1	2.69477	2.5139
ENST00000423084	0.879132	1.83927	1	1	2.34133	1.4622	up	intronic antisense	ENST00000310842.8_2	0.180868	1.13357	1	1	2.69477	2.5139
ENST00000555403	-1.07704	0.474001	1	1	0.945204	2.02224	down	natural antisense	ENST00000311459.11_3	0.221662	1.16608	1	1	0.811244	0.589582
ENST00000479076	1.29259	2.44968	1	1	1.34513	0.0525383	up	natural antisense	ENST00000311573.9_1	-1.97976	0.253531	1	1	0.0799249	2.05969
ENST00000512512	1.32085	2.49814	1	1	1.35505	0.034196	up	natural antisense	ENST00000314595.5_1	0.327422	1.25477	1	1	1.47947	1.15205
ENST00000585749	-1.274	0.413512	1	1	0	1.274	down	natural antisense	ENST00000314616.10_1	0.210626	1.15719	1	1	4.90093	4.69031
ENST00000478193	0.994045	1.99176	1	1	1.34098	0.346935	up	intronic antisense	ENST00000317126.8_1	1.21931	2.32835	1	1	1.52321	0.303907
ENST00000478193	0.994045	1.99176	1	1	1.34098	0.346935	up	intronic antisense	ENST00000317168.10_1	-0.18184	0.881578	1	1	0.553934	0.735773
ENST00000599221	0.721479	1.64887	1	1	0.721479	0	up	intronic antisense	ENST00000317398.10_2	-0.492189	0.710946	1	1	0.460442	0.95263
ENST00000468889	0.805173	1.74736	1	1	1.13701	0.331838	up	natural antisense	ENST00000318981.9_1	0.0493841	1.03482	1	1	0.960705	0.911321
ENST00000563734	-0.625672	0.648118	1	1	0.18381	0.809483	down	natural antisense	ENST00000320225.9_2	0.398566	1.3182	1	1	1.34095	0.942385
ENST00000624094	-0.998973	0.500356	1	1	1.60228	2.60125	down	natural antisense	ENST00000320934.7_1	-0.351706	0.783657	1	1	2.47392	2.82562
ENST00000468303	-0.626125	0.647914	1	1	0.0757886	0.701914	down	natural antisense	ENST00000339255.2_2	-1.15911	0.447787	1	1	1.31747	2.47659
ENST00000545509	0.871234	1.82923	1	1	0.871234	0	up	natural antisense	ENST00000342628.6_1	-0.105387	0.929555	1	1	2.12552	2.23091
ENST00000455202	0.794067	1.73396	1	1	1.226	0.431932	up	natural antisense	ENST00000342631.7_1	-0.311218	0.805961	1	1	0.634421	0.945639
ENST00000513539	-0.602596	0.658568	1	1	1.28601	1.8886	down	natural antisense	ENST00000345239.6_1	0.84287	1.79361	1	1	2.85489	2.01202
ENST00000479076	1.29259	2.44968	1	1	1.34513	0.0525383	up	intronic antisense	ENST00000347088.9_1	1.68667	3.21912	1	1	1.93652	0.249849
ENST00000496559	-0.781559	0.581738	1	1	0.0783899	0.859949	down	natural antisense	ENST00000354883.10_1	-0.337247	0.79155	1	1	0.357265	0.694512
ENST00000466326	-0.834139	0.560918	1	1	0	0.834139	down	natural antisense	ENST00000357388.7_1	-0.199661	0.870755	1	1	2.30919	2.50885
ENST00000618536	-0.599167	0.660135	1	1	0	0.599167	down	natural antisense	ENST00000357447.6_1	0.711478	1.63748	1	1	3.38293	2.67145
ENST00000388955	-0.949388	0.517852	1	1	0	0.949388	down	natural antisense	ENST00000358357.7_1	-0.0398171	0.972778	1	1	3.62575	3.66557
ENST00000545509	0.871234	1.82923	1	1	0.871234	0	up	natural antisense	ENST00000359843.7_3	-0.0998257	0.933146	1	1	2.1895	2.28932
ENST00000468889	0.805173	1.74736	1	1	1.13701	0.331838	up	natural antisense	ENST00000360366.8_1	-0.630343	0.646023	1	1	0.10293	0.733273
ENST00000603468	-0.899507	0.53607	1	1	0.623002	1.52251	down	intronic antisense	ENST00000360655.8_3	-1.02041	0.492978	1	1	2.3563	3.37671
ENST00000545509	0.871234	1.82923	1	1	0.871234	0	up	natural antisense	ENST00000361953.7_3	0.407216	1.32612	1	1	1.67169	1.26447
ENST00000479076	1.29259	2.44968	1	1	1.34513	0.0525383	up	intronic antisense	ENST00000368330.6_1	0.774006	1.71001	1	1	2.52764	1.75364
ENST00000497086	-0.86616	0.548605	1	1	1.12114	1.9873	down	natural antisense	ENST00000368690.7_1	0.421983	1.33977	1	1	2.61611	2.19413
ENST00000491825	-0.620973	0.650232	1	1	0.422209	1.04318	down	natural antisense	ENST00000368921.4_1	-0.0419971	0.971309	1	1	2.20077	2.24277
ENST00000528942	-0.636817	0.64313	1	1	0	0.636817	down	natural antisense	ENST00000370280.1_1	0.179177	1.13224	1	1	1.50419	1.32502
ENST00000528942	-0.636817	0.64313	1	1	0	0.636817	down	natural antisense	ENST00000370282.7_1	0.796709	1.73713	1	1	3.16637	2.36966
ENST00000468437	-0.799298	0.574629	1	1	0	0.799298	down	natural antisense	ENST00000370641.3_1	0.0681641	1.04838	1	1	4.54886	4.4807
ENST00000468437	-0.799298	0.574629	1	1	0	0.799298	down	intronic antisense	ENST00000370645.8_1	0.33849	1.26443	1	1	5.45337	5.11488
ENST00000493083	1.1302	2.18889	1	1	1.22561	0.0954127	up	natural antisense	ENST00000372025.4_1	0.549116	1.46319	1	1	3.36858	2.81947
ENST00000497437	0.635336	1.5533	1	1	0.901555	0.266219	up	natural antisense	ENST00000372517.6_3	0.0676345	1.048	1	1	2.41954	2.35191
ENST00000535644	-1.12971	0.457007	1	1	0.298669	1.42838	down	natural antisense	ENST00000376745.8_1	-1.312	0.402763	1	1	3.6646	4.9766
ENST00000467961	-0.593595	0.662689	1	1	0.805785	1.39938	down	natural antisense	ENST00000377526.3_1	1.39733	2.63414	1	1	2.27008	0.872747
ENST00000494188	0.850762	1.80345	1	1	1.58023	0.729468	up	intronic antisense	ENST00000377990.6_2	0.491792	1.40619	1	1	1.53821	1.04641
ENST00000561700	0.651549	1.57085	1	1	0.860831	0.209282	up	natural antisense	ENST00000378799.10_1	0.300631	1.23168	1	1	1.22805	0.927422
ENST00000570555	0.676911	1.59871	1	1	1.63761	0.960699	up	intronic antisense	ENST00000380358.8_2	0.561519	1.47582	1	1	3.6369	3.07538
ENST00000506928	1.29566	2.45488	1	1	1.7075	0.411843	up	natural antisense	ENST00000380494.9_1	0.603568	1.51947	1	1	2.38343	1.77986
ENST00000512512	1.32085	2.49814	1	1	1.35505	0.034196	up	natural antisense	ENST00000381227.5_1	-0.125615	0.916613	1	1	3.29399	3.41961
ENST00000480713	0.86996	1.82761	1	1	1.15103	0.28107	up	intronic antisense	ENST00000391758.5_2	-0.173881	0.886455	1	1	0.604574	0.778455
ENST00000480713	0.86996	1.82761	1	1	1.15103	0.28107	up	intronic antisense	ENST00000391759.5_2	0.357488	1.28119	1	1	3.21167	2.85418
ENST00000467961	-0.593595	0.662689	1	1	0.805785	1.39938	down	natural antisense	ENST00000393937.6_1	-0.29214	0.81669	1	1	1.06766	1.3598
ENST00000492604	0.609448	1.52568	1	1	0.913523	0.304075	up	natural antisense	ENST00000394457.7_2	0.374332	1.29624	1	1	2.21299	1.83866
ENST00000478193	0.994045	1.99176	1	1	1.34098	0.346935	up	natural antisense	ENST00000394919.5_1	-0.173794	0.886508	1	1	1.03071	1.2045
ENST00000388955	-0.949388	0.517852	1	1	0	0.949388	down	natural antisense	ENST00000395270.5_1	-0.0122993	0.991511	1	1	1.90656	1.91886
ENST00000540344	0.928249	1.90297	1	1	1.01376	0.0855117	up	natural antisense	ENST00000399788.6_1	-0.0225046	0.984522	1	1	3.40747	3.42997
ENST00000463300	-1.02789	0.490426	1	1	0.10317	1.13106	down	intronic antisense	ENST00000402285.7_1	0.0984797	1.07064	1	1	7.26605	7.16757
ENST00000464243	0.619752	1.53661	1	1	1.40186	0.78211	up	intronic antisense	ENST00000402285.7_1	0.0984797	1.07064	1	1	7.26605	7.16757
ENST00000497086	-0.86616	0.548605	1	1	1.12114	1.9873	down	natural antisense	ENST00000403433.5_2	-0.559767	0.678412	1	1	2.46511	3.02487
ENST00000455202	0.794067	1.73396	1	1	1.226	0.431932	up	natural antisense	ENST00000405547.7_1	-0.619432	0.650927	1	1	0	0.619432
ENST00000479076	1.29259	2.44968	1	1	1.34513	0.0525383	up	natural antisense	ENST00000405763.7_1	0.110563	1.07965	1	1	1.31948	1.20891
ENST00000466414	1.55365	2.93559	1	1	2.20164	0.64799	up	intronic antisense	ENST00000409170.3_3	0.369034	1.29149	1	1	3.8867	3.51767
ENST00000461601	1.41244	2.66186	1	1	1.41244	0	up	natural antisense	ENST00000409207.5_1	-0.350882	0.784105	1	1	3.81789	4.16878
ENST00000466414	1.55365	2.93559	1	1	2.20164	0.64799	up	intronic antisense	ENST00000409338.5_3	-0.260255	0.83494	1	1	2.76474	3.02499
ENST00000465573	-0.785137	0.580297	1	1	0	0.785137	down	intronic antisense	ENST00000426480.1_1	-0.692595	0.61874	1	1	0.363006	1.0556
ENST00000512512	1.32085	2.49814	1	1	1.35505	0.034196	up	natural antisense	ENST00000431623.6_2	1.26042	2.39565	1	1	2.82492	1.56451
ENST00000494983	-2.19488	0.218412	1	1	0.43527	2.63015	down	intronic antisense	ENST00000432416.5_1	-0.344463	0.787601	1	1	0.26927	0.613733
ENST00000522515	-0.854117	0.553204	1	1	0.815623	1.66974	down	natural antisense	ENST00000432471.6_2	0.544729	1.45875	1	1	1.03811	0.493385
ENST00000478934	0.683709	1.60626	1	1	1.6861	1.00239	up	natural antisense	ENST00000439602.6_1	0.216411	1.16184	1	1	8.00762	7.79121
ENST00000512512	1.32085	2.49814	1	1	1.35505	0.034196	up	natural antisense	ENST00000441246.6_1	-1.21279	0.431433	1	1	0	1.21279
ENST00000461601	1.41244	2.66186	1	1	1.41244	0	up	natural antisense	ENST00000444761.6_1	1.66212	3.16481	1	1	1.66847	0.00635261
ENST00000423084	0.879132	1.83927	1	1	2.34133	1.4622	up	intronic antisense	ENST00000454397.1_4	-0.304224	0.809878	1	1	0.304499	0.608723
ENST00000418663	0.777496	1.71415	1	1	2.52438	1.74689	up	natural antisense	ENST00000454397.1_4	-0.304224	0.809878	1	1	0.304499	0.608723
ENST00000468889	0.805173	1.74736	1	1	1.13701	0.331838	up	natural antisense	ENST00000461783.7_3	-0.496628	0.708761	1	1	0.276985	0.773613
ENST00000466326	-0.834139	0.560918	1	1	0	0.834139	down	natural antisense	ENST00000462787.5_1	-0.219698	0.858745	1	1	3.64836	3.86806
ENST00000437840	0.989181	1.98506	1	1	2.78739	1.79821	up	natural antisense	ENST00000463584.1_1	0.309921	1.23964	1	1	0.837103	0.527181
ENST00000466326	-0.834139	0.560918	1	1	0	0.834139	down	natural antisense	ENST00000465903.5_1	-0.511664	0.701413	1	1	0.605022	1.11669
ENST00000466326	-0.834139	0.560918	1	1	0	0.834139	down	natural antisense	ENST00000469762.5_1	0.0440031	1.03097	1	1	1.50359	1.45958
ENST00000528942	-0.636817	0.64313	1	1	0	0.636817	down	natural antisense	ENST00000479918.5_1	0.243022	1.18347	1	1	1.95144	1.70842
ENST00000466326	-0.834139	0.560918	1	1	0	0.834139	down	natural antisense	ENST00000485867.5_1	-0.0772893	0.947837	1	1	0.567666	0.644955
ENST00000618536	-0.599167	0.660135	1	1	0	0.599167	down	natural antisense	ENST00000495956.2_1	0.462068	1.37751	1	1	3.89731	3.43524
ENST00000487096	-0.760626	0.59024	1	1	0.114884	0.87551	down	intronic antisense	ENST00000497820.1_1	-0.101695	0.931938	1	1	0.615597	0.717292
ENST00000505852	0.735801	1.66532	1	1	1.44622	0.710419	up	intronic antisense	ENST00000505477.5_1	-1.31327	0.402408	1	1	0	1.31327
ENST00000599221	0.721479	1.64887	1	1	0.721479	0	up	intronic antisense	ENST00000512439.6_1	0.0374232	1.02628	1	1	1.67511	1.63769
ENST00000578216	-0.652107	0.63635	1	1	0.611982	1.26409	down	natural antisense	ENST00000528522.5_1	-0.0706626	0.952201	1	1	1.57608	1.64674
ENST00000478193	0.994045	1.99176	1	1	1.34098	0.346935	up	intronic antisense	ENST00000530461.5_1	0.645883	1.5647	1	1	0.813416	0.167533
ENST00000610119	0.643794	1.56243	1	1	0.708687	0.0648925	up	intronic antisense	ENST00000530472.5_2	-0.490061	0.711995	1	1	2.84832	3.33838
ENST00000610119	0.643794	1.56243	1	1	0.708687	0.0648925	up	intronic antisense	ENST00000533259.1_1	0.171405	1.12615	1	1	0.613889	0.442484
ENST00000545509	0.871234	1.82923	1	1	0.871234	0	up	natural antisense	ENST00000535350.1_1	-0.0200017	0.986232	1	1	2.12803	2.14803
ENST00000561700	0.651549	1.57085	1	1	0.860831	0.209282	up	intronic antisense	ENST00000535424.5_1	0.418419	1.33646	1	1	1.69931	1.28089
ENST00000616576	-0.843209	0.557402	1	1	0.100084	0.943293	down	natural antisense	ENST00000538010.5_1	-0.0786943	0.946914	1	1	1.04136	1.12006
ENST00000561700	0.651549	1.57085	1	1	0.860831	0.209282	up	intronic antisense	ENST00000541571.6_1	0.672005	1.59329	1	1	0.672005	0
ENST00000550712	0.985707	1.98028	1	1	0.985707	0	up	intronic antisense	ENST00000547843.1_1	0.02012	1.01404	1	1	1.20465	1.18453
ENST00000551237	0.931606	1.9074	1	1	1.45761	0.526001	up	natural antisense	ENST00000552029.1_1	0.0509586	1.03595	1	1	1.08349	1.03253
ENST00000553974	-0.821551	0.565833	1	1	0	0.821551	down	intronic antisense	ENST00000555925.5_1	0.881726	1.84258	1	1	3.82034	2.93862
ENST00000589101	2.10293	4.2958	1	1	2.95029	0.84736	up	intronic antisense	ENST00000560055.5_1	1.03946	2.05545	1	1	3.16218	2.12273
ENST00000558928	1.4867	2.80248	1	1	2.02231	0.535608	up	natural antisense	ENST00000560985.5_1	0.0868537	1.06205	1	1	2.38098	2.29412
ENST00000439987	-2.25861	0.208973	1	1	0	2.25861	down	intronic antisense	ENST00000566264.1_1	0.242114	1.18272	1	1	3.8345	3.59238
ENST00000570555	0.676911	1.59871	1	1	1.63761	0.960699	up	natural antisense	ENST00000571846.5_2	-0.174071	0.886338	1	1	0.508932	0.683003
ENST00000588100	0.643299	1.5619	1	1	0.643299	0	up	natural antisense	ENST00000587708.6_1	-0.31588	0.803361	1	1	2.73499	3.05087
ENST00000588295	-0.840715	0.558367	1	1	0.727513	1.56823	down	natural antisense	ENST00000592782.5_1	0.0752122	1.05352	1	1	1.17088	1.09567
ENST00000484707	0.736689	1.66635	1	1	2.01129	1.2746	up	intronic antisense	ENST00000597342.5_1	0.809503	1.75261	1	1	0.902527	0.0930246
ENST00000566181	-0.718714	0.607639	1	1	3.33487	4.05358	down	natural antisense	ENST00000609261.5_1	-0.500838	0.706696	1	1	2.93129	3.43213
ENST00000417886	-1.02318	0.492032	1	1	0.718931	1.74211	down	natural antisense	ENST00000613899.4_3	0.168136	1.12361	1	1	1.00958	0.841442
ENST00000610119	0.643794	1.56243	1	1	0.708687	0.0648925	up	intronic antisense	ENST00000613995.4_2	-0.473696	0.720117	1	1	1.00488	1.47858
ENST00000619858	-0.6336	0.644566	1	1	1.25787	1.89147	down	natural antisense	ENST00000616199.4_1	-1.0614	0.479166	1	1	2.77204	3.83345
ENST00000610119	0.643794	1.56243	1	1	0.708687	0.0648925	up	intronic antisense	ENST00000616206.4_1	-0.174071	0.886338	1	1	2.0609	2.23497
ENST00000610119	0.643794	1.56243	1	1	0.708687	0.0648925	up	intronic antisense	ENST00000617454.4_1	-0.231881	0.851524	1	1	0.368183	0.600064
ENST00000610119	0.643794	1.56243	1	1	0.708687	0.0648925	up	intronic antisense	ENST00000618462.4_1	0.0604696	1.04281	1	1	1.77014	1.70967
ENST00000610119	0.643794	1.56243	1	1	0.708687	0.0648925	up	intronic antisense	ENST00000618504.4_1	0.303677	1.23429	1	1	1.79696	1.49328
ENST00000497281	1.13664	2.19868	1	1	1.39635	0.259709	up	intronic antisense	ENST00000618670.4_1	0.305293	1.23567	1	1	1.08599	0.780701
ENST00000587120	1.47474	2.77934	1	1	1.96236	0.487618	up	natural antisense	ENST00000619929.4_1	-0.339855	0.790121	1	1	3.05623	3.39608
ENST00000610119	0.643794	1.56243	1	1	0.708687	0.0648925	up	intronic antisense	ENST00000620605.4_1	0.347822	1.27264	1	1	1.0878	0.739976
ENST00000541977	-0.926217	0.526236	1	1	0.259709	1.18593	down	natural antisense	ENST00000622602.1_2	0.43729	1.35406	1	1	3.18109	2.7438
ENST00000545509	0.871234	1.82923	1	1	0.871234	0	up	natural antisense	ENST00000627656.2_3	-0.357746	0.780383	1	1	2.36937	2.72712
ENST00000512512	1.32085	2.49814	1	1	1.35505	0.034196	up	natural antisense	ENST00000639658.1_1	0.271232	1.20684	1	1	4.12455	3.85332

## Sheet: sample 3 vs. sample 0
#Condition pair: sample 3 vs sample 0 Column A: lncRNA_id, The transcript id of lncRNA. Column B: log2FC, if the comparison is test vs control, log2 of the fold change will be calculated by Test_FPKM - Control_FPKM. Column C: Fold_Change, 2^(log2FC) of lncRNA. Column D: p_value, The p-value of the F-statistic for gene. The p-value will be setted as 1 if any group in the comparison has no repilica…
Differential expression lncRNA (antisense)									Expression information of mRNA
lncRNA_id	log2FC	Fold_Change	p_value	q_value	Z-1_FPKM	K-1_FPKM	Regulation	Relationship	mRNA_id	log2FC	Fold_Change	p_value	q_value	Z-1_FPKM	K-1_FPKM
ENST00000489088	1.11854	2.17128	1	1	1.11854	0	up	intronic antisense	ENST00000239891.3_2	-0.0891076	0.940104	1	1	3.40683	3.49593
ENST00000548806	-0.724989	0.605002	1	1	0	0.724989	down	natural antisense	ENST00000240050.8_1	-0.309431	0.80696	1	1	0.304436	0.613867
ENST00000467837	-0.71016	0.611252	1	1	0.649648	1.35981	down	natural antisense	ENST00000241704.7_1	0.224709	1.16854	1	1	4.17411	3.9494
ENST00000453189	-0.936374	0.522545	1	1	0.967757	1.90413	down	natural antisense	ENST00000242505.10_1	-0.0728211	0.950777	1	1	1.19881	1.27163
ENST00000326237	1.2861	2.43868	1	1	1.2861	0	up	natural antisense	ENST00000245046.6_1	-0.0572489	0.961095	1	1	3.49691	3.55415
ENST00000464156	-1.28167	0.411318	1	1	0.573734	1.85541	down	natural antisense	ENST00000260600.9_2	0.191158	1.14168	1	1	2.03554	1.84438
ENST00000590353	1.10959	2.15784	1	1	1.72693	0.617346	up	intronic antisense	ENST00000262139.9_1	-0.0259416	0.982179	1	1	4.23736	4.26331
ENST00000462909	-2.02226	0.246172	1	1	0	2.02226	down	natural antisense	ENST00000264094.7_1	0.144879	1.10564	1	1	0.736145	0.591266
ENST00000467961	1.76462	3.39784	1	1	3.164	1.39938	up	natural antisense	ENST00000264094.7_1	0.144879	1.10564	1	1	0.736145	0.591266
ENST00000563040	0.765777	1.70029	1	1	1.27356	0.507781	up	natural antisense	ENST00000279392.7_1	0.300904	1.23192	1	1	1.8981	1.5972
ENST00000503892	0.684363	1.60699	1	1	0.848595	0.164231	up	intronic antisense	ENST00000282268.7_1	0.732644	1.66168	1	1	0.762624	0.02998
ENST00000394225	2.09017	4.25797	1	1	3.40772	1.31755	up	intronic antisense	ENST00000296543.9_1	0.232361	1.17476	1	1	2.89716	2.6648
ENST00000511466	-0.867149	0.548229	1	1	0.634827	1.50198	down	natural antisense	ENST00000296577.8_1	0.210932	1.15744	1	1	4.62933	4.4184
ENST00000513539	-0.779968	0.58238	1	1	1.10863	1.8886	down	natural antisense	ENST00000296805.7_1	0.0977678	1.07012	1	1	2.12055	2.02278
ENST00000524482	0.603604	1.51951	1	1	1.84993	1.24633	up	natural antisense	ENST00000307289.10_1	-0.545546	0.685132	1	1	0.351758	0.897304
ENST00000585749	-1.274	0.413512	1	1	0	1.274	down	natural antisense	ENST00000314616.10_1	0.0464506	1.03272	1	1	4.73676	4.69031
ENST00000543153	1.21194	2.31649	1	1	1.80704	0.595104	up	natural antisense	ENST00000315436.7_1	0.19426	1.14414	1	1	5.04058	4.84632
ENST00000478193	0.586156	1.50124	1	1	0.933091	0.346935	up	intronic antisense	ENST00000317168.10_1	0.603669	1.51958	1	1	1.33944	0.735773
ENST00000525626	-0.825893	0.564133	1	1	0.513255	1.33915	down	intronic antisense	ENST00000318562.12_2	-0.258253	0.8361	1	1	1.13739	1.39564
ENST00000552307	0.874126	1.8329	1	1	0.874126	0	up	natural antisense	ENST00000324871.11_1	0.127744	1.09258	1	1	1.64903	1.52128
ENST00000489721	0.587131	1.50226	1	1	0.587131	0	up	natural antisense	ENST00000336984.6_1	0.232731	1.17506	1	1	1.17874	0.946006
ENST00000497112	0.622434	1.53947	1	1	0.673972	0.0515378	up	intronic antisense	ENST00000340934.9_1	-0.665675	0.630393	1	1	3.33774	4.00341
ENST00000474863	-1.83063	0.281142	1	1	1.67926	3.50989	down	natural antisense	ENST00000340934.9_1	-0.665675	0.630393	1	1	3.33774	4.00341
ENST00000513539	-0.779968	0.58238	1	1	1.10863	1.8886	down	natural antisense	ENST00000345239.6_1	-0.308234	0.80763	1	1	1.70379	2.01202
ENST00000496559	-0.852161	0.553954	1	1	0.00778825	0.859949	down	natural antisense	ENST00000354883.10_1	0.112426	1.08104	1	1	0.806938	0.694512
ENST00000618536	-0.599167	0.660135	1	1	0	0.599167	down	natural antisense	ENST00000357447.6_1	0.354146	1.27823	1	1	3.0256	2.67145
ENST00000614899	0.857083	1.81137	1	1	0.935703	0.0786194	up	natural antisense	ENST00000357447.6_1	0.354146	1.27823	1	1	3.0256	2.67145
ENST00000464290	1.82592	3.54534	1	1	1.82592	0	up	natural antisense	ENST00000358994.8_1	-0.240288	0.846576	1	1	4.09922	4.3395
ENST00000486041	2.8249	7.08563	1	1	2.9973	0.172406	up	natural antisense	ENST00000368008.5_1	-0.519858	0.69744	1	1	0.674316	1.19417
ENST00000497086	-0.975438	0.508585	1	1	1.01186	1.9873	down	natural antisense	ENST00000368690.7_1	0.182153	1.13458	1	1	2.37628	2.19413
ENST00000369857	-2.37259	0.193099	1	1	0.544721	2.91731	down	natural antisense	ENST00000369878.8_1	0.171827	1.12648	1	1	0.592197	0.42037
ENST00000468437	-0.799298	0.574629	1	1	0	0.799298	down	natural antisense	ENST00000370641.3_1	0.543167	1.45717	1	1	5.02386	4.4807
ENST00000468437	-0.799298	0.574629	1	1	0	0.799298	down	intronic antisense	ENST00000370645.8_1	-0.432281	0.741089	1	1	4.6826	5.11488
ENST00000489721	0.587131	1.50226	1	1	0.587131	0	up	natural antisense	ENST00000375104.6_1	1.02493	2.03486	1	1	2.66682	1.64189
ENST00000489721	0.587131	1.50226	1	1	0.587131	0	up	natural antisense	ENST00000375107.7_1	-0.2181	0.859697	1	1	4.40799	4.62609
ENST00000535644	-1.2385	0.423812	1	1	0.189876	1.42838	down	natural antisense	ENST00000376745.8_1	-0.182532	0.881155	1	1	4.79407	4.9766
ENST00000524482	0.603604	1.51951	1	1	1.84993	1.24633	up	natural antisense	ENST00000377190.7_2	-0.457998	0.727996	1	1	1.83564	2.29364
ENST00000467961	1.76462	3.39784	1	1	3.164	1.39938	up	natural antisense	ENST00000377526.3_1	0.657169	1.57698	1	1	1.52992	0.872747
ENST00000462909	-2.02226	0.246172	1	1	0	2.02226	down	natural antisense	ENST00000377526.3_1	0.657169	1.57698	1	1	1.52992	0.872747
ENST00000487588	-0.719098	0.607477	1	1	0.210591	0.929689	down	intronic antisense	ENST00000393471.2_1	-0.859986	0.550958	1	1	0.131549	0.991535
ENST00000467961	1.76462	3.39784	1	1	3.164	1.39938	up	natural antisense	ENST00000393937.6_1	0.00693063	1.00482	1	1	1.36673	1.3598
ENST00000462909	-2.02226	0.246172	1	1	0	2.02226	down	natural antisense	ENST00000393937.6_1	0.00693063	1.00482	1	1	1.36673	1.3598
ENST00000472729	-1.09638	0.467688	1	1	0	1.09638	down	natural antisense	ENST00000394440.7_1	-0.0527038	0.964128	1	1	5.63384	5.68655
ENST00000478193	0.586156	1.50124	1	1	0.933091	0.346935	up	natural antisense	ENST00000394919.5_1	-0.177832	0.884031	1	1	1.02667	1.2045
ENST00000489721	0.587131	1.50226	1	1	0.587131	0	up	natural antisense	ENST00000395496.5_1	-0.0991122	0.933607	1	1	1.18725	1.28636
ENST00000489721	0.587131	1.50226	1	1	0.587131	0	up	natural antisense	ENST00000395497.5_1	-0.131136	0.913112	1	1	0.781974	0.91311
ENST00000489721	0.587131	1.50226	1	1	0.587131	0	up	natural antisense	ENST00000395499.5_1	-0.613348	0.653678	1	1	2.03222	2.64557
ENST00000467796	-1.08782	0.470472	1	1	0	1.08782	down	intronic antisense	ENST00000395590.5_1	-0.184218	0.880126	1	1	0.613678	0.797896
ENST00000467796	-1.08782	0.470472	1	1	0	1.08782	down	natural antisense	ENST00000395595.7_1	-0.0600963	0.9592	1	1	1.08539	1.14549
ENST00000503892	0.684363	1.60699	1	1	0.848595	0.164231	up	intronic antisense	ENST00000396027.8_1	0.2501	1.18929	1	1	1.68479	1.43469
ENST00000525626	-0.825893	0.564133	1	1	0.513255	1.33915	down	intronic antisense	ENST00000397510.7_1	-0.569401	0.673897	1	1	0.609515	1.17892
ENST00000525626	-0.825893	0.564133	1	1	0.513255	1.33915	down	intronic antisense	ENST00000397512.7_1	0.189535	1.1404	1	1	1.35944	1.1699
ENST00000394225	2.09017	4.25797	1	1	3.40772	1.31755	up	intronic antisense	ENST00000398947.1_1	0.136164	1.09898	1	1	3.15167	3.0155
ENST00000540344	0.623249	1.54034	1	1	0.708761	0.0855117	up	natural antisense	ENST00000399788.6_1	-0.00351059	0.99757	1	1	3.42646	3.42997
ENST00000463300	-0.987315	0.504416	1	1	0.143747	1.13106	down	intronic antisense	ENST00000402285.7_1	-1.95519	0.257887	1	1	5.21238	7.16757
ENST00000497086	-0.975438	0.508585	1	1	1.01186	1.9873	down	natural antisense	ENST00000403433.5_2	-0.209682	0.864728	1	1	2.81519	3.02487
ENST00000464156	-1.28167	0.411318	1	1	0.573734	1.85541	down	natural antisense	ENST00000405392.5_2	0.598979	1.51464	1	1	2.53263	1.93365
ENST00000479445	-0.795922	0.575975	1	1	1.49541	2.29134	down	intronic antisense	ENST00000409170.3_3	1.88096	3.68319	1	1	5.39862	3.51767
ENST00000461601	1.88917	3.70423	1	1	1.88917	0	up	natural antisense	ENST00000409207.5_1	-1.06685	0.477361	1	1	3.10193	4.16878
ENST00000479445	-0.795922	0.575975	1	1	1.49541	2.29134	down	intronic antisense	ENST00000409338.5_3	-0.744719	0.596784	1	1	2.28028	3.02499
ENST00000487588	-0.719098	0.607477	1	1	0.210591	0.929689	down	intronic antisense	ENST00000410042.1_1	0.295271	1.22712	1	1	0.736096	0.440825
ENST00000460715	1.8234	3.53915	1	1	2.28785	0.464449	up	natural antisense	ENST00000417752.1_1	-0.324299	0.798686	1	1	0.483154	0.807453
ENST00000438961	0.59915	1.51482	1	1	0.669501	0.0703509	up	natural antisense	ENST00000417852.5_2	0.329556	1.25663	1	1	1.39618	1.06663
ENST00000494983	-2.18445	0.219996	1	1	0.445692	2.63015	down	intronic antisense	ENST00000432416.5_1	-0.311208	0.805966	1	1	0.302525	0.613733
ENST00000453189	-0.936374	0.522545	1	1	0.967757	1.90413	down	natural antisense	ENST00000445951.5_1	-0.193683	0.874371	1	1	0.512192	0.705875
ENST00000487588	-0.719098	0.607477	1	1	0.210591	0.929689	down	intronic antisense	ENST00000449211.1_2	-0.888269	0.540262	1	1	0.0145852	0.902855
ENST00000464290	1.82592	3.54534	1	1	1.82592	0	up	natural antisense	ENST00000455292.5_1	0.10991	1.07916	1	1	1.07107	0.961165
ENST00000494983	-2.18445	0.219996	1	1	0.445692	2.63015	down	intronic antisense	ENST00000458426.5_2	0.360782	1.28412	1	1	0.622572	0.261791
ENST00000525626	-0.825893	0.564133	1	1	0.513255	1.33915	down	intronic antisense	ENST00000488769.1_1	0.466021	1.38129	1	1	1.3813	0.915277
ENST00000618536	-0.599167	0.660135	1	1	0	0.599167	down	natural antisense	ENST00000495956.2_1	0.217549	1.16276	1	1	3.65279	3.43524
ENST00000464156	-1.28167	0.411318	1	1	0.573734	1.85541	down	natural antisense	ENST00000498288.1_3	0.0788347	1.05616	1	1	1.10644	1.0276
ENST00000484282	-1.76468	0.294291	1	1	0.214805	1.97949	down	natural antisense	ENST00000509219.1_3	-0.394749	0.760622	1	1	0.829628	1.22438
ENST00000513539	-0.779968	0.58238	1	1	1.10863	1.8886	down	natural antisense	ENST00000509430.5_1	0.791057	1.73034	1	1	0.79779	0.00673319
ENST00000503892	0.684363	1.60699	1	1	0.848595	0.164231	up	intronic antisense	ENST00000511817.1_1	-0.520719	0.697024	1	1	0.746846	1.26757
ENST00000484282	-1.76468	0.294291	1	1	0.214805	1.97949	down	natural antisense	ENST00000512866.5_1	-0.64013	0.641655	1	1	0.856358	1.49649
ENST00000484282	-1.76468	0.294291	1	1	0.214805	1.97949	down	natural antisense	ENST00000513973.5_1	0.899692	1.86567	1	1	3.95203	3.05234
ENST00000524482	0.603604	1.51951	1	1	1.84993	1.24633	up	natural antisense	ENST00000526060.5_3	1.12574	2.18214	1	1	2.54559	1.41985
ENST00000524482	0.603604	1.51951	1	1	1.84993	1.24633	up	natural antisense	ENST00000529639.5_1	0.0742219	1.05279	1	1	5.62132	5.5471
ENST00000525626	-0.825893	0.564133	1	1	0.513255	1.33915	down	natural antisense	ENST00000530636.5_2	0.17277	1.12722	1	1	1.61476	1.44199
ENST00000525626	-0.825893	0.564133	1	1	0.513255	1.33915	down	natural antisense	ENST00000533256.5_2	-0.106091	0.929102	1	1	0.763168	0.869259
ENST00000438961	0.59915	1.51482	1	1	0.669501	0.0703509	up	natural antisense	ENST00000537384.5_1	0.756582	1.68948	1	1	0.899373	0.142791
ENST00000543153	1.21194	2.31649	1	1	1.80704	0.595104	up	natural antisense	ENST00000544233.5_1	0.271209	1.20682	1	1	0.81968	0.54847
ENST00000590353	1.10959	2.15784	1	1	1.72693	0.617346	up	intronic antisense	ENST00000546360.5_2	-0.405268	0.755096	1	1	0.640731	1.046
ENST00000548806	-0.724989	0.605002	1	1	0	0.724989	down	natural antisense	ENST00000552029.1_1	0.0732635	1.05209	1	1	1.1058	1.03253
ENST00000556284	0.963685	1.95029	1	1	2.13631	1.17262	up	natural antisense	ENST00000555220.5_1	0.132937	1.09652	1	1	1.01747	0.884531
ENST00000635274	-0.722275	0.606141	1	1	13.7788	14.501	down	intronic antisense	ENST00000557111.5_1	-0.599418	0.66002	1	1	0.587563	1.18698
ENST00000590353	1.10959	2.15784	1	1	1.72693	0.617346	up	intronic antisense	ENST00000591744.1_1	-0.25767	0.836438	1	1	1.27081	1.52848
ENST00000588295	-0.622872	0.649377	1	1	0.945356	1.56823	down	natural antisense	ENST00000592782.5_1	0.561203	1.4755	1	1	1.65687	1.09567
ENST00000464156	-1.28167	0.411318	1	1	0.573734	1.85541	down	natural antisense	ENST00000606682.5_3	-1.20387	0.434109	1	1	1.52078	2.72465
ENST00000566181	-2.32414	0.199694	1	1	1.72944	4.05358	down	natural antisense	ENST00000609261.5_1	-0.318709	0.801787	1	1	3.11342	3.43213
ENST00000474863	-1.83063	0.281142	1	1	1.67926	3.50989	down	natural antisense	ENST00000612948.4_1	1.4511	2.73416	1	1	3.02334	1.57224
ENST00000497112	0.622434	1.53947	1	1	0.673972	0.0515378	up	intronic antisense	ENST00000612948.4_1	1.4511	2.73416	1	1	3.02334	1.57224
ENST00000525626	-0.825893	0.564133	1	1	0.513255	1.33915	down	intronic antisense	ENST00000614442.4_2	-0.0171648	0.988173	1	1	1.03144	1.04861
ENST00000462880	-0.619195	0.651034	1	1	0.894845	1.51404	down	natural antisense	ENST00000615950.4_1	0.238655	1.17989	1	1	2.25056	2.01191
ENST00000484282	-1.76468	0.294291	1	1	0.214805	1.97949	down	natural antisense	ENST00000616566.4_1	0.288493	1.22136	1	1	0.59796	0.309467
ENST00000541977	-1.18593	0.439542	1	1	0	1.18593	down	natural antisense	ENST00000622602.1_2	0.107192	1.07713	1	1	2.85099	2.7438
ENST00000479759	0.648336	1.56736	1	1	0.740502	0.0921655	up	natural antisense	ENST00000642050.1_1	0.0302168	1.02117	1	1	0.948608	0.918391
ENST00000461993	0.654918	1.57453	1	1	1.1129	0.457986	up	natural antisense	ENST00000642050.1_1	0.0302168	1.02117	1	1	0.948608	0.918391

## Sheet: sample 4 vs. sample 0
#Condition pair: sample 4 vs sample 0 Column A: lncRNA_id, The transcript id of lncRNA. Column B: log2FC, if the comparison is test vs control, log2 of the fold change will be calculated by Test_FPKM - Control_FPKM. Column C: Fold_Change, 2^(log2FC) of lncRNA. Column D: p_value, The p-value of the F-statistic for gene. The p-value will be setted as 1 if any group in the comparison has no repilica…
Differential expression lncRNA (antisense)									Expression information of mRNA
lncRNA_id	log2FC	Fold_Change	p_value	q_value	N-1_FPKM	K-1_FPKM	Regulation	Relationship	mRNA_id	log2FC	Fold_Change	p_value	q_value	N-1_FPKM	K-1_FPKM
ENST00000468303	-0.597154	0.661057	1	1	0.104759	0.701914	down	natural antisense	ENST00000003912.7_2	-0.0886563	0.940398	1	1	4.49529	4.58395
ENST00000479047	-1.06264	0.478755	1	1	0.167484	1.23012	down	natural antisense	ENST00000215057.6_1	0.534612	1.44855	1	1	0.946373	0.411761
ENST00000461972	0.835455	1.78442	1	1	0.859958	0.0245027	up	natural antisense	ENST00000238721.8_1	-0.206747	0.866489	1	1	2.44016	2.64691
ENST00000467837	-0.655105	0.635029	1	1	0.704703	1.35981	down	natural antisense	ENST00000241704.7_1	0.606088	1.52213	1	1	4.55549	3.9494
ENST00000366264	-0.700092	0.615533	1	1	0	0.700092	down	natural antisense	ENST00000245046.6_1	0.0963293	1.06905	1	1	3.65048	3.55415
ENST00000326237	0.788852	1.7277	1	1	0.788852	0	up	natural antisense	ENST00000245046.6_1	0.0963293	1.06905	1	1	3.65048	3.55415
ENST00000638026	-0.810867	0.570039	1	1	0.331852	1.14272	down	natural antisense	ENST00000249636.10_1	0.311664	1.24114	1	1	2.76635	2.45468
ENST00000555290	-0.588056	0.665238	1	1	0.885438	1.47349	down	natural antisense	ENST00000256319.6_1	-0.126676	0.915939	1	1	3.11114	3.23781
ENST00000464156	-0.67984	0.624234	1	1	1.17557	1.85541	down	natural antisense	ENST00000260600.9_2	-0.0822844	0.944561	1	1	1.76209	1.84438
ENST00000467961	1.41087	2.65898	1	1	2.81025	1.39938	up	natural antisense	ENST00000264094.7_1	-0.321514	0.800229	1	1	0.269751	0.591266
ENST00000462909	-2.02226	0.246172	1	1	0	2.02226	down	natural antisense	ENST00000264094.7_1	-0.321514	0.800229	1	1	0.269751	0.591266
ENST00000536687	0.975463	1.96627	1	1	1.15397	0.178506	up	natural antisense	ENST00000278826.10_1	0.15243	1.11144	1	1	1.69949	1.54706
ENST00000460059	0.84569	1.79712	1	1	1.5429	0.697212	up	natural antisense	ENST00000283928.9_1	0.61806	1.53481	1	1	3.28717	2.66911
ENST00000522515	-1.1645	0.44612	1	1	0.505244	1.66974	down	natural antisense	ENST00000287322.4_2	0.082209	1.05864	1	1	3.36021	3.278
ENST00000431419	0.673145	1.59454	1	1	2.94636	2.27322	up	natural antisense	ENST00000292478.8_1	-0.374011	0.771634	1	1	1.56815	1.94216
ENST00000394225	1.62707	3.08884	1	1	2.94462	1.31755	up	intronic antisense	ENST00000296543.9_1	0.463965	1.37933	1	1	3.12876	2.6648
ENST00000511466	-0.945456	0.519265	1	1	0.55652	1.50198	down	natural antisense	ENST00000296577.8_1	0.185225	1.13699	1	1	4.60362	4.4184
ENST00000562828	-0.58994	0.664371	1	1	0.349803	0.939743	down	natural antisense	ENST00000299572.9_1	-0.840462	0.558465	1	1	3.06297	3.90343
ENST00000562828	-0.58994	0.664371	1	1	0.349803	0.939743	down	natural antisense	ENST00000305850.9_1	-0.355479	0.78161	1	1	0.636877	0.992355
ENST00000550712	0.750918	1.68286	1	1	0.750918	0	up	intronic antisense	ENST00000308086.2_1	0.456245	1.37197	1	1	0.914426	0.458181
ENST00000519335	-0.937679	0.522072	1	1	0	0.937679	down	natural antisense	ENST00000308511.8_1	-0.402269	0.756667	1	1	1.95506	2.35733
ENST00000467249	-0.667553	0.629574	1	1	2.4982	3.16575	down	intronic antisense	ENST00000309049.8_1	0.354687	1.27871	1	1	0.996169	0.641482
ENST00000555403	-1.07441	0.474865	1	1	0.947831	2.02224	down	natural antisense	ENST00000311459.11_3	0.0810904	1.05782	1	1	0.670673	0.589582
ENST00000585749	-1.274	0.413512	1	1	0	1.274	down	natural antisense	ENST00000314616.10_1	-0.0509962	0.96527	1	1	4.63931	4.69031
ENST00000592250	0.868387	1.82562	1	1	1.8099	0.941515	up	natural antisense	ENST00000314616.10_1	-0.0509962	0.96527	1	1	4.63931	4.69031
ENST00000478193	1.15717	2.23019	1	1	1.5041	0.346935	up	intronic antisense	ENST00000317168.10_1	-0.160768	0.894549	1	1	0.575005	0.735773
ENST00000525626	0.783675	1.72151	1	1	2.12282	1.33915	up	intronic antisense	ENST00000318562.12_2	-0.956249	0.515395	1	1	0.439392	1.39564
ENST00000526857	0.652461	1.57185	1	1	2.49424	1.84177	up	intronic antisense	ENST00000318562.12_2	-0.956249	0.515395	1	1	0.439392	1.39564
ENST00000571102	-0.595761	0.661695	1	1	0.16756	0.763321	down	intronic antisense	ENST00000318782.8_1	0.00177104	1.00123	1	1	1.14866	1.14689
ENST00000624094	-0.660081	0.632843	1	1	1.94117	2.60125	down	natural antisense	ENST00000320934.7_1	0.364829	1.28773	1	1	3.19045	2.82562
ENST00000461972	0.835455	1.78442	1	1	0.859958	0.0245027	up	natural antisense	ENST00000335934.8_1	0.0516934	1.03648	1	1	3.10104	3.04935
ENST00000468303	-0.597154	0.661057	1	1	0.104759	0.701914	down	natural antisense	ENST00000339255.2_2	-0.171077	0.888179	1	1	2.30551	2.47659
ENST00000465443	0.622742	1.5398	1	1	3.34703	2.72429	up	natural antisense	ENST00000339355.2_1	0.483774	1.3984	1	1	0.640612	0.156838
ENST00000474863	-2.09908	0.233407	1	1	1.41081	3.50989	down	natural antisense	ENST00000340934.9_1	-0.548004	0.683966	1	1	3.45541	4.00341
ENST00000545509	0.617843	1.53458	1	1	0.617843	0	up	natural antisense	ENST00000342628.6_1	-0.642997	0.640381	1	1	1.58791	2.23091
ENST00000622976	-0.732985	0.601658	1	1	0.894601	1.62759	down	intronic antisense	ENST00000354636.7_1	0.565814	1.48022	1	1	1.67015	1.10433
ENST00000496559	-0.81994	0.566465	1	1	0.0400087	0.859949	down	natural antisense	ENST00000354883.10_1	0.166501	1.12233	1	1	0.861013	0.694512
ENST00000614899	0.744178	1.67502	1	1	0.822797	0.0786194	up	natural antisense	ENST00000357447.6_1	0.556439	1.47064	1	1	3.22789	2.67145
ENST00000467249	-0.667553	0.629574	1	1	2.4982	3.16575	down	intronic antisense	ENST00000358769.6_1	0.163782	1.12022	1	1	0.595251	0.431469
ENST00000464290	1.62347	3.08116	1	1	1.62347	0	up	natural antisense	ENST00000358994.8_1	-0.640516	0.641484	1	1	3.69899	4.3395
ENST00000545509	0.617843	1.53458	1	1	0.617843	0	up	natural antisense	ENST00000359843.7_3	0.0122851	1.00855	1	1	2.30161	2.28932
ENST00000479159	-0.772547	0.585383	1	1	0.81094	1.58349	down	natural antisense	ENST00000361951.4_1	-0.429681	0.742426	1	1	3.05758	3.48726
ENST00000545509	0.617843	1.53458	1	1	0.617843	0	up	natural antisense	ENST00000361953.7_3	-0.966729	0.511665	1	1	0.297741	1.26447
ENST00000497086	-1.59403	0.331245	1	1	0.393275	1.9873	down	natural antisense	ENST00000368690.7_1	0.149679	1.10932	1	1	2.34381	2.19413
ENST00000493083	0.866414	1.82313	1	1	0.961827	0.0954127	up	natural antisense	ENST00000372025.4_1	0.070797	1.0503	1	1	2.89026	2.81947
ENST00000566599	0.74935	1.68104	1	1	2.08067	1.33132	up	natural antisense	ENST00000374358.4_1	0.3138	1.24298	1	1	5.93121	5.61741
ENST00000470062	-0.719894	0.607142	1	1	0	0.719894	down	natural antisense	ENST00000376582.7_1	0.128419	1.09309	1	1	3.18192	3.05351
ENST00000535644	-1.24406	0.422182	1	1	0.184318	1.42838	down	natural antisense	ENST00000376745.8_1	-0.128942	0.914502	1	1	4.84766	4.9766
ENST00000467961	1.41087	2.65898	1	1	2.81025	1.39938	up	natural antisense	ENST00000377526.3_1	0.997116	1.99601	1	1	1.86986	0.872747
ENST00000462909	-2.02226	0.246172	1	1	0	2.02226	down	natural antisense	ENST00000377526.3_1	0.997116	1.99601	1	1	1.86986	0.872747
ENST00000466201	0.631086	1.54873	1	1	1.31637	0.685289	up	natural antisense	ENST00000378197.4_1	0.430743	1.34793	1	1	1.07753	0.646783
ENST00000466201	0.631086	1.54873	1	1	1.31637	0.685289	up	natural antisense	ENST00000378202.5_1	0.39558	1.31547	1	1	1.16353	0.767949
ENST00000466201	0.631086	1.54873	1	1	1.31637	0.685289	up	natural antisense	ENST00000378203.5_1	-1.10932	0.463511	1	1	0.376234	1.48556
ENST00000506928	1.85108	3.60771	1	1	2.26292	0.411843	up	natural antisense	ENST00000380494.9_1	0.528691	1.44262	1	1	2.30855	1.77986
ENST00000470606	-0.646141	0.638987	1	1	2.19532	2.84146	down	natural antisense	ENST00000381120.7_1	-0.0128664	0.991121	1	1	1.82847	1.84133
ENST00000461838	0.715687	1.64227	1	1	3.0224	2.30671	up	natural antisense	ENST00000381140.8_3	-1.30247	0.405433	1	1	2.00306	3.30553
ENST00000480713	0.989051	1.98488	1	1	1.27012	0.28107	up	intronic antisense	ENST00000391758.5_2	0.330181	1.25717	1	1	1.10864	0.778455
ENST00000480713	0.989051	1.98488	1	1	1.27012	0.28107	up	intronic antisense	ENST00000391759.5_2	-0.0768327	0.948137	1	1	2.77735	2.85418
ENST00000622976	-0.732985	0.601658	1	1	0.894601	1.62759	down	intronic antisense	ENST00000393577.7_1	0.246454	1.18629	1	1	1.04573	0.799278
ENST00000622976	-0.732985	0.601658	1	1	0.894601	1.62759	down	intronic antisense	ENST00000393578.7_2	0.0200336	1.01398	1	1	2.98218	2.96215
ENST00000462909	-2.02226	0.246172	1	1	0	2.02226	down	natural antisense	ENST00000393937.6_1	-0.0587391	0.960103	1	1	1.30106	1.3598
ENST00000467961	1.41087	2.65898	1	1	2.81025	1.39938	up	natural antisense	ENST00000393937.6_1	-0.0587391	0.960103	1	1	1.30106	1.3598
ENST00000531590	-2.58161	0.167055	1	1	0	2.58161	down	intronic antisense	ENST00000393958.6_1	0.0343532	1.0241	1	1	1.97173	1.93738
ENST00000531590	-2.58161	0.167055	1	1	0	2.58161	down	intronic antisense	ENST00000393960.5_1	-0.534664	0.69032	1	1	0.735462	1.27013
ENST00000472729	-1.09638	0.467688	1	1	0	1.09638	down	natural antisense	ENST00000394440.7_1	-0.263414	0.833114	1	1	5.42313	5.68655
ENST00000478193	1.15717	2.23019	1	1	1.5041	0.346935	up	natural antisense	ENST00000394919.5_1	0.0932219	1.06675	1	1	1.29772	1.2045
ENST00000526857	0.652461	1.57185	1	1	2.49424	1.84177	up	intronic antisense	ENST00000397510.7_1	-0.169636	0.889067	1	1	1.00928	1.17892
ENST00000525626	0.783675	1.72151	1	1	2.12282	1.33915	up	intronic antisense	ENST00000397510.7_1	-0.169636	0.889067	1	1	1.00928	1.17892
ENST00000525626	0.783675	1.72151	1	1	2.12282	1.33915	up	intronic antisense	ENST00000397512.7_1	0.175012	1.12897	1	1	1.34492	1.1699
ENST00000526857	0.652461	1.57185	1	1	2.49424	1.84177	up	intronic antisense	ENST00000397512.7_1	0.175012	1.12897	1	1	1.34492	1.1699
ENST00000394225	1.62707	3.08884	1	1	2.94462	1.31755	up	intronic antisense	ENST00000398947.1_1	-0.103667	0.930664	1	1	2.91183	3.0155
ENST00000540344	0.702505	1.62733	1	1	0.788017	0.0855117	up	natural antisense	ENST00000399788.6_1	0.14644	1.10683	1	1	3.57641	3.42997
ENST00000469733	-0.697188	0.616773	1	1	0.314838	1.01203	down	natural antisense	ENST00000400921.6_1	-0.622976	0.64933	1	1	0.0406007	0.663577
ENST00000463300	-0.965569	0.512077	1	1	0.165494	1.13106	down	intronic antisense	ENST00000402285.7_1	-0.855377	0.552721	1	1	6.3122	7.16757
ENST00000464243	0.656359	1.5761	1	1	1.43847	0.78211	up	intronic antisense	ENST00000402285.7_1	-0.855377	0.552721	1	1	6.3122	7.16757
ENST00000497086	-1.59403	0.331245	1	1	0.393275	1.9873	down	natural antisense	ENST00000403433.5_2	-0.0611028	0.958531	1	1	2.96377	3.02487
ENST00000622976	-0.732985	0.601658	1	1	0.894601	1.62759	down	intronic antisense	ENST00000403681.6_2	1.13629	2.19815	1	1	4.92429	3.788
ENST00000464156	-0.67984	0.624234	1	1	1.17557	1.85541	down	natural antisense	ENST00000405392.5_2	0.49755	1.41181	1	1	2.4312	1.93365
ENST00000461972	0.835455	1.78442	1	1	0.859958	0.0245027	up	natural antisense	ENST00000407482.5_1	0.153	1.11188	1	1	1.29469	1.14169
ENST00000466414	1.7952	3.47063	1	1	2.44319	0.64799	up	intronic antisense	ENST00000409170.3_3	-0.171252	0.888072	1	1	3.34642	3.51767
ENST00000468823	0.82501	1.77155	1	1	1.44354	0.618534	up	intronic antisense	ENST00000409170.3_3	-0.171252	0.888072	1	1	3.34642	3.51767
ENST00000486121	1.03901	2.05482	1	1	1.55451	0.5155	up	intronic antisense	ENST00000409170.3_3	-0.171252	0.888072	1	1	3.34642	3.51767
ENST00000479445	0.585515	1.50057	1	1	2.87685	2.29134	up	intronic antisense	ENST00000409170.3_3	-0.171252	0.888072	1	1	3.34642	3.51767
ENST00000461601	1.2231	2.33447	1	1	1.2231	0	up	natural antisense	ENST00000409207.5_1	0.215004	1.16071	1	1	4.38378	4.16878
ENST00000466414	1.7952	3.47063	1	1	2.44319	0.64799	up	intronic antisense	ENST00000409338.5_3	-0.600744	0.659414	1	1	2.42425	3.02499
ENST00000468823	0.82501	1.77155	1	1	1.44354	0.618534	up	intronic antisense	ENST00000409338.5_3	-0.600744	0.659414	1	1	2.42425	3.02499
ENST00000486121	1.03901	2.05482	1	1	1.55451	0.5155	up	intronic antisense	ENST00000409338.5_3	-0.600744	0.659414	1	1	2.42425	3.02499
ENST00000479445	0.585515	1.50057	1	1	2.87685	2.29134	up	intronic antisense	ENST00000409338.5_3	-0.600744	0.659414	1	1	2.42425	3.02499
ENST00000461972	0.835455	1.78442	1	1	0.859958	0.0245027	up	natural antisense	ENST00000413037.1_1	-0.422977	0.745884	1	1	1.91296	2.33594
ENST00000460715	2.50103	5.6609	1	1	2.96548	0.464449	up	natural antisense	ENST00000417752.1_1	0.22059	1.16521	1	1	1.02804	0.807453
ENST00000498038	0.964859	1.95187	1	1	1.75402	0.789161	up	natural antisense	ENST00000419277.5_1	0.330597	1.25753	1	1	0.853256	0.522658
ENST00000471184	0.970754	1.95986	1	1	0.970754	0	up	natural antisense	ENST00000419277.5_1	0.330597	1.25753	1	1	0.853256	0.522658
ENST00000476723	-0.669784	0.628601	1	1	0.286731	0.956515	down	intronic antisense	ENST00000421999.7_2	-0.0365392	0.974991	1	1	0.942631	0.97917
ENST00000622976	-0.732985	0.601658	1	1	0.894601	1.62759	down	intronic antisense	ENST00000425208.6_1	0.248648	1.18809	1	1	2.98475	2.7361
ENST00000465573	-0.785137	0.580297	1	1	0	0.785137	down	intronic antisense	ENST00000426480.1_1	-0.329269	0.795939	1	1	0.726332	1.0556
ENST00000460059	0.84569	1.79712	1	1	1.5429	0.697212	up	natural antisense	ENST00000427814.5_1	-0.548173	0.683886	1	1	0.362096	0.910269
ENST00000460059	0.84569	1.79712	1	1	1.5429	0.697212	up	natural antisense	ENST00000430432.5_1	-0.51388	0.700337	1	1	0.200558	0.714438
ENST00000494983	-2.12644	0.229022	1	1	0.503704	2.63015	down	intronic antisense	ENST00000432416.5_1	-0.467193	0.723371	1	1	0.146541	0.613733
ENST00000522515	-1.1645	0.44612	1	1	0.505244	1.66974	down	natural antisense	ENST00000432471.6_2	0.426564	1.34403	1	1	0.919949	0.493385
ENST00000464290	1.62347	3.08116	1	1	1.62347	0	up	natural antisense	ENST00000455292.5_1	-0.0957795	0.935766	1	1	0.865385	0.961165
ENST00000491168	0.867757	1.82482	1	1	0.867757	0	up	natural antisense	ENST00000463584.1_1	0.10413	1.07485	1	1	0.631311	0.527181
ENST00000526857	0.652461	1.57185	1	1	2.49424	1.84177	up	intronic antisense	ENST00000488769.1_1	0.233848	1.17597	1	1	1.14913	0.915277
ENST00000525626	0.783675	1.72151	1	1	2.12282	1.33915	up	intronic antisense	ENST00000488769.1_1	0.233848	1.17597	1	1	1.14913	0.915277
ENST00000467249	-0.667553	0.629574	1	1	2.4982	3.16575	down	intronic antisense	ENST00000495025.2_1	-0.133936	0.911342	1	1	0.475911	0.609847
ENST00000464156	-0.67984	0.624234	1	1	1.17557	1.85541	down	natural antisense	ENST00000498288.1_3	-0.238183	0.847812	1	1	0.789418	1.0276
ENST00000505852	1.07013	2.09962	1	1	1.78055	0.710419	up	intronic antisense	ENST00000505477.5_1	-0.619778	0.650771	1	1	0.693489	1.31327
ENST00000506506	1.48048	2.79042	1	1	1.48048	0	up	natural antisense	ENST00000514390.5_1	-0.966904	0.511603	1	1	0.0951696	1.06207
ENST00000525626	0.783675	1.72151	1	1	2.12282	1.33915	up	natural antisense	ENST00000530636.5_2	1.32098	2.49836	1	1	2.76297	1.44199
ENST00000481895	1.44127	2.71559	1	1	2.30384	0.862578	up	intronic antisense	ENST00000530710.5_3	0.238458	1.17973	1	1	0.646051	0.407593
ENST00000525626	0.783675	1.72151	1	1	2.12282	1.33915	up	natural antisense	ENST00000533256.5_2	-0.54396	0.685886	1	1	0.325299	0.869259
ENST00000526857	0.652461	1.57185	1	1	2.49424	1.84177	up	intronic antisense	ENST00000533256.5_2	-0.54396	0.685886	1	1	0.325299	0.869259
ENST00000545509	0.617843	1.53458	1	1	0.617843	0	up	natural antisense	ENST00000535350.1_1	-0.615999	0.652478	1	1	1.53203	2.14803
ENST00000622976	-0.732985	0.601658	1	1	0.894601	1.62759	down	intronic antisense	ENST00000536545.5_1	0.207327	1.15455	1	1	2.42963	2.22231
ENST00000622976	-0.732985	0.601658	1	1	0.894601	1.62759	down	intronic antisense	ENST00000541363.5_1	0.42532	1.34287	1	1	2.81448	2.38916
ENST00000550712	0.750918	1.68286	1	1	0.750918	0	up	intronic antisense	ENST00000547843.1_1	-0.00540796	0.996259	1	1	1.17912	1.18453
ENST00000556284	-0.693612	0.618304	1	1	0.479012	1.17262	down	natural antisense	ENST00000555220.5_1	-0.35414	0.782336	1	1	0.53039	0.884531
ENST00000564399	0.685915	1.60872	1	1	0.980033	0.294118	up	natural antisense	ENST00000562595.5_2	-0.543046	0.68632	1	1	1.59267	2.13572
ENST00000569119	-0.610745	0.654858	1	1	0.214069	0.824814	down	natural antisense	ENST00000568666.5_2	-0.118963	0.920849	1	1	0.814168	0.933131
ENST00000571102	-0.595761	0.661695	1	1	0.16756	0.763321	down	intronic antisense	ENST00000572687.1_1	-2.53003	0.173135	1	1	0	2.53003
ENST00000469733	-0.697188	0.616773	1	1	0.314838	1.01203	down	intronic antisense	ENST00000597060.1	-0.128291	0.914915	1	1	0.549362	0.677653
ENST00000479047	-1.06264	0.478755	1	1	0.167484	1.23012	down	natural antisense	ENST00000599369.5_1	0.0687584	1.04881	1	1	1.35976	1.291
ENST00000464156	-0.67984	0.624234	1	1	1.17557	1.85541	down	natural antisense	ENST00000606682.5_3	-1.72568	0.302355	1	1	0.998968	2.72465
ENST00000566181	-2.05345	0.240907	1	1	2.00013	4.05358	down	natural antisense	ENST00000609261.5_1	-0.576865	0.670419	1	1	2.85526	3.43213
ENST00000474863	-2.09908	0.233407	1	1	1.41081	3.50989	down	natural antisense	ENST00000612948.4_1	0.743477	1.67421	1	1	2.31571	1.57224
ENST00000506506	1.48048	2.79042	1	1	1.48048	0	up	natural antisense	ENST00000613466.4_1	0.336106	1.26235	1	1	0.868737	0.53263
ENST00000526857	0.652461	1.57185	1	1	2.49424	1.84177	up	intronic antisense	ENST00000614442.4_2	-0.634045	0.644367	1	1	0.414562	1.04861
ENST00000525626	0.783675	1.72151	1	1	2.12282	1.33915	up	intronic antisense	ENST00000614442.4_2	-0.634045	0.644367	1	1	0.414562	1.04861
ENST00000466201	0.631086	1.54873	1	1	1.31637	0.685289	up	natural antisense	ENST00000616640.1_1	0.562071	1.47639	1	1	1.09995	0.537881
ENST00000497281	0.70289	1.62776	1	1	0.962599	0.259709	up	intronic antisense	ENST00000618670.4_1	-0.11389	0.924093	1	1	0.66681	0.780701
ENST00000541977	-1.18593	0.439542	1	1	0	1.18593	down	natural antisense	ENST00000622602.1_2	0.087868	1.0628	1	1	2.83166	2.7438
ENST00000545509	0.617843	1.53458	1	1	0.617843	0	up	natural antisense	ENST00000627656.2_3	-0.622497	0.649546	1	1	2.10462	2.72712
ENST00000479759	0.723923	1.65167	1	1	0.816088	0.0921655	up	natural antisense	ENST00000642050.1_1	0.220618	1.16523	1	1	1.13901	0.918391
